# Supplementary material
Source: publisher figshare collection journal article supplement (https://tandf.figshare.com/articles/dataset/_/7930883)

# checkCIF/PLATON report

Structure factors have been supplied for datablock(s) I

THIS REPORT IS FOR GUIDANCE ONLY. IF USED AS PART OF A REVIEW PROCEDURE FOR PUBLICATION, IT SHOULD NOT REPLACE THE EXPERTISE OF AN EXPERIENCED CRYSTALLOGRAPHIC REFEREE.

No syntax errors found.      CIF dictionary      Interpreting this report

## Datablock: I

---

|                                                               |                 |                                 |
|---------------------------------------------------------------|-----------------|---------------------------------|
| Bond precision:                                               | C-C = 0.0145 A  | Wavelength=0.71073              |
| Cell:                                                         | a=25.9703(19)   | b=9.1157(7)      c=11.3951(8)   |
|                                                               | alpha=90        | beta=90      gamma=90           |
| Temperature:                                                  | 293 K           |                                 |
|                                                               | Calculated      | Reported                        |
| Volume                                                        | 2697.7(3)       | 2697.6(3)                       |
| Space group                                                   | P m n 21        | P m n 21                        |
| Hall group                                                    | P 2ac -2        | P 2ac -2                        |
| Moiety formula                                                | C43 H27 Co3 O16 | 0.5(C86 H54 Co6 O32)            |
| Sum formula                                                   | C43 H27 Co3 O16 | C43 H27 Co3 O16                 |
| Mr                                                            | 976.44          | 976.43                          |
| Dx,g cm-3                                                     | 1.202           | 1.202                           |
| Z                                                             | 2               | 2                               |
| Mu (mm-1)                                                     | 0.968           | 0.968                           |
| F000                                                          | 988.0           | 988.0                           |
| F000'                                                         | 990.58          |                                 |
| h,k,lmax                                                      | 31,11,13        | 31,11,13                        |
| Nref                                                          | 5128[ 2703]     | 5113                            |
| Tmin,Tmax                                                     | 0.770,0.800     | 0.773,0.808                     |
| Tmin'                                                         | 0.755           |                                 |
| Correction method= # Reported T Limits: Tmin=0.773 Tmax=0.808 |                 |                                 |
| AbsCorr = MULTI-SCAN                                          |                 |                                 |
| Data completeness=                                            | 1.89/1.00       | Theta(max)= 25.495              |
| R(reflections)=                                               | 0.0674( 4716)   | wR2(reflections)= 0.1780( 5113) |
| S =                                                           | 1.090           | Npar= 293                       |

---

The following ALERTS were generated. Each ALERT has the format

**test-name\_ALERT\_alert-type\_alert-level.**

Click on the hyperlinks for more details of the test.

---

### Alert level A

PLAT602\_ALERT\_2\_A VERY LARGE Solvent Accessible VOID(S) in Structure ! Info

---

### Alert level B

PLAT242\_ALERT\_2\_B Low 'MainMol' Ueq as Compared to Neighbors of Col Check  
PLAT430\_ALERT\_2\_B Short Inter D...A Contact 04 ..04 . 2.77 Ang.  
1-x,y,z = 3\_655 Check

---

### Alert level C

STRVA01\_ALERT\_4\_C Flack test results are ambiguous.  
From the CIF: \_refine\_ls\_abs\_structure\_Flack 0.490  
From the CIF: \_refine\_ls\_abs\_structure\_Flack\_su 0.050  
PLAT213\_ALERT\_2\_C Atom O8 has ADP max/min Ratio .... 3.5 oblate  
PLAT220\_ALERT\_2\_C Non-Solvent Resd 1 O Ueq(max)/Ueq(min) Range 4.7 Ratio  
PLAT222\_ALERT\_3\_C Non-Solv. Resd 1 H Uiso(max)/Uiso(min) Range 5.5 Ratio  
PLAT341\_ALERT\_3\_C Low Bond Precision on C-C Bonds ..... 0.01452 Ang.  
PLAT369\_ALERT\_2\_C Long C(sp2)-C(sp2) Bond C1 - C2 . 1.53 Ang.  
PLAT369\_ALERT\_2\_C Long C(sp2)-C(sp2) Bond C5 - C8 . 1.54 Ang.  
PLAT790\_ALERT\_4\_C Centre of Gravity not Within Unit Cell: Resd. # 1 Note  
C43 H27 Co3 O16  
PLAT918\_ALERT\_3\_C Reflection(s) with I(obs) much Smaller I(calc) . 1 Check  
PLAT934\_ALERT\_3\_C Number of (Iobs-Icalc)/SigmaW > 10 Outliers .... 1 Check  
PLAT975\_ALERT\_2\_C Check Calcd Resid. Dens. 0.65A From OlW 0.72 eA-3  
PLAT975\_ALERT\_2\_C Check Calcd Resid. Dens. 1.01A From O4 0.56 eA-3  
PLAT976\_ALERT\_2\_C Check Calcd Resid. Dens. 0.46A From OlW -0.59 eA-3  
PLAT977\_ALERT\_2\_C Check Negative Difference Density on H22 -0.39 eA-3  
PLAT978\_ALERT\_2\_C Number C-C Bonds with Positive Residual Density. 0 Info

---

### Alert level G

PLAT003\_ALERT\_2\_G Number of Uiso or Uij Restrained non-H Atoms ... 12 Report  
PLAT004\_ALERT\_5\_G Polymeric Structure Found with Maximum Dimension 3 Info  
PLAT007\_ALERT\_5\_G Number of Unrefined Donor-H Atoms ..... 3 Report  
PLAT042\_ALERT\_1\_G Calc. and Reported MoietyFormula Strings Differ Please Check  
PLAT066\_ALERT\_1\_G Predicted and Reported Tmin&Tmax Range Identical ? Check  
PLAT083\_ALERT\_2\_G SHELXL Second Parameter in WGHT Unusually Large 11.45 Why ?  
PLAT115\_ALERT\_5\_G ADDSYM Detects Noncrystallographic Inversion ... 91% Check  
PLAT177\_ALERT\_4\_G The CIF-Embedded .res File Contains DELU Records 1 Report  
PLAT178\_ALERT\_4\_G The CIF-Embedded .res File Contains SIMU Records 1 Report  
PLAT186\_ALERT\_4\_G The CIF-Embedded .res File Contains ISOR Records 1 Report  
PLAT199\_ALERT\_1\_G Reported \_cell\_measurement\_temperature .... (K) 293 Check  
PLAT200\_ALERT\_1\_G Reported \_diffrn\_ambient\_temperature .... (K) 293 Check  
PLAT300\_ALERT\_4\_G Atom Site Occupancy of H2WA Constrained at 0.5 Check  
PLAT300\_ALERT\_4\_G Atom Site Occupancy of H2WB Constrained at 0.5 Check  
PLAT720\_ALERT\_4\_G Number of Unusual/Non-Standard Labels ..... 2 Note  
PLAT764\_ALERT\_4\_G Overcomplete CIF Bond List Detected (Rep/Expd) . 1.10 Ratio  
PLAT794\_ALERT\_5\_G Tentative Bond Valency for Col (II) . 2.16 Info  
PLAT860\_ALERT\_3\_G Number of Least-Squares Restraints ..... 95 Note  
PLAT910\_ALERT\_3\_G Missing # of FCF Reflection(s) Below Theta(Min). 3 Note  
PLAT913\_ALERT\_3\_G Missing # of Very Strong Reflections in FCF .... 1 Note  
PLAT961\_ALERT\_5\_G Dataset Contains no Negative Intensities ..... Please Check

---

- 1 **ALERT level A** = Most likely a serious problem - resolve or explain  
2 **ALERT level B** = A potentially serious problem, consider carefully  
15 **ALERT level C** = Check. Ensure it is not caused by an omission or oversight  
21 **ALERT level G** = General information/check it is not something unexpected

4 ALERT type 1 CIF construction/syntax error, inconsistent or missing data

14 ALERT type 2 Indicator that the structure model may be wrong or deficient  
7 ALERT type 3 Indicator that the structure quality may be low  
9 ALERT type 4 Improvement, methodology, query or suggestion  
5 ALERT type 5 Informative message, check

---

## checkCIF publication errors

---

### Alert level A

PUBL004\_ALERT\_1\_A The contact author's name and address are missing,  
\_publ\_contact\_author\_name and \_publ\_contact\_author\_address.  
PUBL005\_ALERT\_1\_A \_publ\_contact\_author\_email, \_publ\_contact\_author\_fax and  
\_publ\_contact\_author\_phone are all missing.  
At least one of these should be present.  
PUBL006\_ALERT\_1\_A \_publ\_requested\_journal is missing  
e.g. 'Acta Crystallographica Section C'  
PUBL008\_ALERT\_1\_A \_publ\_section\_title is missing. Title of paper.  
PUBL009\_ALERT\_1\_A \_publ\_author\_name is missing. List of author(s) name(s).  
PUBL010\_ALERT\_1\_A \_publ\_author\_address is missing. Author(s) address(es).  
PUBL012\_ALERT\_1\_A \_publ\_section\_abstract is missing.  
Abstract of paper in English.

---

7 **ALERT level A** = Data missing that is essential or data in wrong format  
0 **ALERT level G** = General alerts. Data that may be required is missing

---

### Publication of your CIF

You should attempt to resolve as many as possible of the alerts in all categories. Often the minor alerts point to easily fixed oversights, errors and omissions in your CIF or refinement strategy, so attention to these fine details can be worthwhile. In order to resolve some of the more serious problems it may be necessary to carry out additional measurements or structure refinements. However, the nature of your study may justify the reported deviations from journal submission requirements and the more serious of these should be commented upon in the discussion or experimental section of a paper or in the "special\_details" fields of the CIF. *checkCIF* was carefully designed to identify outliers and unusual parameters, but every test has its limitations and alerts that are not important in a particular case may appear. Conversely, the absence of alerts does not guarantee there are no aspects of the results needing attention. It is up to the individual to critically assess their own results and, if necessary, seek expert advice.

If level A alerts remain, which you believe to be justified deviations, and you intend to submit this CIF for publication in a journal, you should additionally insert an explanation in your CIF using the Validation Reply Form (VRF) below. This will allow your explanation to be considered as part of the review process.

### Validation response form

Please find below a validation response form (VRF) that can be filled in and pasted into your CIF.

```
# start Validation Reply Form
_vrf_PUBL004_GLOBAL
;
PROBLEM: The contact author's name and address are missing,
```

```

RESPONSE: ...
;
_vrf_PUBL005_GLOBAL
;
PROBLEM: _publ_contact_author_email, _publ_contact_author_fax and
RESPONSE: ...
;
_vrf_PUBL006_GLOBAL
;
PROBLEM: _publ_requested_journal is missing
RESPONSE: ...
;
_vrf_PUBL008_GLOBAL
;
PROBLEM: _publ_section_title is missing. Title of paper.
RESPONSE: ...
;
_vrf_PUBL009_GLOBAL
;
PROBLEM: _publ_author_name is missing. List of author(s) name(s).
RESPONSE: ...
;
_vrf_PUBL010_GLOBAL
;
PROBLEM: _publ_author_address is missing. Author(s) address(es).
RESPONSE: ...
;
_vrf_PUBL012_GLOBAL
;
PROBLEM: _publ_section_abstract is missing.
RESPONSE: ...
;
_vrf_PLAT602_I
;
PROBLEM: VERY LARGE Solvent Accessible VOID(S) in Structure      ! Info
RESPONSE: ...
;
# end Validation Reply Form

```

If you wish to submit your CIF for publication in Acta Crystallographica Section C or E, you should upload your CIF via the web. If you wish to submit your CIF for publication in IUCrData you should upload your CIF via the web. If your CIF is to form part of a submission to another IUCr journal, you will be asked, either during electronic submission or by the Co-editor handling your paper, to upload your CIF via our web site.

---

**PLATON version of 13/12/2018; check.def file version of 11/12/2018**

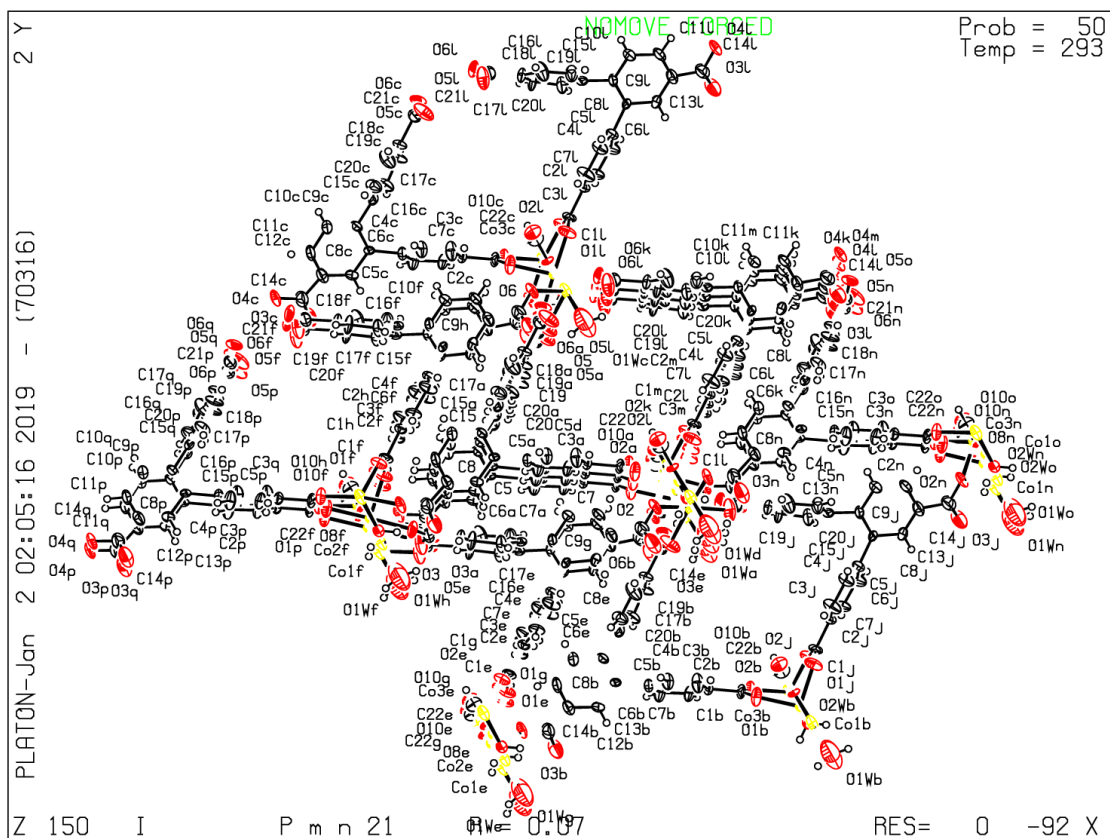

Supplement: Supplementary file 1 [file 1 › checkcif.pdf]
