# Supplementary material
Source: publisher figshare collection journal article supplement (https://tandf.figshare.com/articles/dataset/_/7930883)
Supplement: Supplementary file 1 [file 1 › 1.cif]

data_a
_audit_creation_date               2019-01-02
_audit_creation_method
;
Olex2 1.2-alpha
(compiled 2018.05.29 svn.r3508 for OlexSys, GUI svn.r5532)
;
_shelx_SHELXL_version_number       '2014/7'
_audit_contact_author_address      ?
_audit_contact_author_email        ?
_audit_contact_author_name         ''
_audit_contact_author_phone        ?
_publ_contact_author_id_orcid      ?
_publ_section_references
;
Dolomanov, O.V., Bourhis, L.J., Gildea, R.J, Howard, J.A.K. & Puschmann, H.
 (2009), J. Appl. Cryst. 42, 339-341.

Sheldrick, G.M. (2015). Acta Cryst. A71, 3-8.

Sheldrick, G.M. (2015). Acta Cryst. C71, 3-8.
;
_chemical_name_common              ?
_chemical_name_systematic
;
 ?
;
_chemical_formula_moiety           '0.5(C86 H54 Co6 O32)'
_chemical_formula_sum              'C43 H27 Co3 O16'
_chemical_formula_weight           976.43
_chemical_absolute_configuration   ?
_chemical_melting_point            ?
loop_
  _atom_type_symbol
  _atom_type_description
  _atom_type_scat_dispersion_real
  _atom_type_scat_dispersion_imag
  _atom_type_scat_source
 'C' 'C' 0.0033 0.0016 'International Tables Vol C Tables 4.2.6.8 and 6.1.1.4'
 'H' 'H' 0.0000 0.0000 'International Tables Vol C Tables 4.2.6.8 and 6.1.1.4'
 'Co' 'Co' 0.3494 0.9721 'International Tables Vol C Tables 4.2.6.8 and 6.1.1.4'
 'O' 'O' 0.0106 0.0060 'International Tables Vol C Tables 4.2.6.8 and 6.1.1.4'

_shelx_space_group_comment
;
The symmetry employed for this shelxl refinement is uniquely defined
by the following loop, which should always be used as a source of
symmetry information in preference to the above space-group names.
They are only intended as comments.
;
_space_group_crystal_system        'orthorhombic'
_space_group_IT_number             31
_space_group_name_H-M_alt          'P m n 21'
_space_group_name_Hall             'P 2ac -2'
loop_
  _space_group_symop_operation_xyz
 'x, y, z'
 '-x+1/2, -y, z+1/2'
 '-x, y, z'
 'x+1/2, -y, z+1/2'

_cell_length_a                     25.9703(19)
_cell_length_b                     9.1157(7)
_cell_length_c                     11.3951(8)
_cell_angle_alpha                  90
_cell_angle_beta                   90
_cell_angle_gamma                  90
_cell_volume                       2697.6(3)
_cell_formula_units_Z              2
_cell_measurement_reflns_used      6519
_cell_measurement_temperature      293(2)
_cell_measurement_theta_max        27.726
_cell_measurement_theta_min        2.368
_shelx_estimated_absorpt_T_max     0.808
_shelx_estimated_absorpt_T_min     0.773
_exptl_absorpt_coefficient_mu      0.968
_exptl_absorpt_correction_T_max    0.8080
_exptl_absorpt_correction_T_min    0.7732
_exptl_absorpt_correction_type     multi-scan
_exptl_absorpt_process_details     SADABS
_exptl_absorpt_special_details     ?
_exptl_crystal_colour              red
_exptl_crystal_colour_primary      red
_exptl_crystal_density_diffrn      1.202
_exptl_crystal_density_meas        .
_exptl_crystal_density_method      'not measured'
_exptl_crystal_description         block
_exptl_crystal_F_000               988
_exptl_crystal_size_max            0.28
_exptl_crystal_size_mid            0.26
_exptl_crystal_size_min            0.23
_exptl_special_details
;
 ?
;
_exptl_transmission_factor_max     ?
_exptl_transmission_factor_min     ?
_diffrn_reflns_av_R_equivalents    0.0304
_diffrn_reflns_av_unetI/netI       0.0290
_diffrn_reflns_Laue_measured_fraction_full  0.999
_diffrn_reflns_Laue_measured_fraction_max  0.999
_diffrn_reflns_limit_h_max         30
_diffrn_reflns_limit_h_min         -31
_diffrn_reflns_limit_k_max         11
_diffrn_reflns_limit_k_min         -11
_diffrn_reflns_limit_l_max         13
_diffrn_reflns_limit_l_min         -13
_diffrn_reflns_number              19434
_diffrn_reflns_point_group_measured_fraction_full  0.999
_diffrn_reflns_point_group_measured_fraction_max  0.999
_diffrn_reflns_theta_full          25.242
_diffrn_reflns_theta_max           25.495
_diffrn_reflns_theta_min           2.368
_diffrn_ambient_temperature        293(2)
_diffrn_detector_area_resol_mean   NONE
_diffrn_measured_fraction_theta_full  0.999
_diffrn_measured_fraction_theta_max  0.999
_diffrn_measurement_device_type    'CCD area detector'
_diffrn_measurement_method         'phi and omega scans'
_diffrn_radiation_monochromator    'graphite'
_diffrn_radiation_type             MoK\a
_diffrn_radiation_wavelength       0.71073
_diffrn_source                     ?
_reflns_Friedel_coverage           0.898
_reflns_Friedel_fraction_full      1.000
_reflns_Friedel_fraction_max       1.000
_reflns_number_gt                  4716
_reflns_number_total               5113
_reflns_special_details
;
 Reflections were merged by SHELXL according to the crystal
 class for the calculation of statistics and refinement.
 
 _reflns_Friedel_fraction is defined as the number of unique
 Friedel pairs measured divided by the number that would be
 possible theoretically, ignoring centric projections and
 systematic absences.
;
_reflns_threshold_expression       'I > 2\s(I)'
_computing_cell_refinement         'SAINT v7.34A (Bruker, 200?)'
_computing_data_collection         'Bruker SMART'
_computing_data_reduction          'SAINT v7.34A (Bruker, 200?)'
_computing_molecular_graphics      'Olex2 (Dolomanov et al., 2009)'
_computing_publication_material    'Olex2 (Dolomanov et al., 2009)'
_computing_structure_refinement    'ShelXL (Sheldrick, 2015)'
_computing_structure_solution      'ShelXT (Sheldrick, 2015)'
_refine_diff_density_max           0.983
_refine_diff_density_min           -1.080
_refine_diff_density_rms           0.109
_refine_ls_abs_structure_details
;
 Refined as an inversion twin.
;
_refine_ls_abs_structure_Flack     0.49(5)
_refine_ls_extinction_coef         .
_refine_ls_extinction_method       none
_refine_ls_goodness_of_fit_ref     1.090
_refine_ls_hydrogen_treatment      constr
_refine_ls_matrix_type             full
_refine_ls_number_parameters       293
_refine_ls_number_reflns           5113
_refine_ls_number_restraints       95
_refine_ls_R_factor_all            0.0715
_refine_ls_R_factor_gt             0.0674
_refine_ls_restrained_S_all        1.100
_refine_ls_shift/su_max            0.000
_refine_ls_shift/su_mean           0.000
_refine_ls_structure_factor_coef   Fsqd
_refine_ls_weighting_details      
 'w=1/[\s^2^(Fo^2^)+(0.0709P)^2^+11.4534P] where P=(Fo^2^+2Fc^2^)/3'
_refine_ls_weighting_scheme        calc
_refine_ls_wR_factor_gt            0.1751
_refine_ls_wR_factor_ref           0.1780
_refine_special_details
;
 Refined as a 2-component inversion twin.
;
_olex2_refinement_description
;
1. Twinned data refinement
 Scales: 0.51(5)
 0.49(5)
2. Fixed Uiso
 At 1.2 times of:
  All C(H) groups
 At 1.5 times of:
  All O(H) groups, All O(H,H) groups
3. Rigid bond restraints
 O6, O1W, O8, O2W, O10, C1, C7, C8, C12, O4, C21, C22
 with sigma for 1-2 distances of 0.01 and sigma for 1-3 distances of 0.01
4. Uiso/Uaniso restraints and constraints
O6 \\sim O1W \\sim O8 \\sim O2W \\sim O10 \\sim C1 \\sim C7 \\sim C8 \\sim C12
\\sim O4 \\sim C21 \\sim C22: within 2A with sigma of 0.01 and sigma for
terminal atoms of 0.02
Uanis(O6) \\sim Ueq, Uanis(O1W) \\sim Ueq, Uanis(O8) \\sim Ueq, Uanis(O2W)
\\sim Ueq, Uanis(O10) \\sim Ueq, Uanis(C1) \\sim Ueq, Uanis(C7) \\sim Ueq,
Uanis(C8) \\sim Ueq, Uanis(C12) \\sim Ueq, Uanis(O4) \\sim Ueq, Uanis(C21)
\\sim Ueq, Uanis(C22) \\sim Ueq: with sigma of 0.01 and sigma for terminal
atoms of 0.02
5. Others
 Fixed Sof: H2WA(0.5) H2WB(0.5)
6.a Riding coordinates:
 O1W(H1W), O2W(H2WA,H2WB)
6.b Aromatic/amide H refined with riding coordinates:
 C3(H3), C4(H4), C6(H6), C7(H7), C10(H10), C11(H11), C13(H13), C16(H16),
 C17(H17), C19(H19), C20(H20), C22(H22)
;
_atom_sites_solution_hydrogens     mixed
_atom_sites_solution_primary       dual
_atom_sites_solution_secondary     ?
loop_
  _atom_site_label
  _atom_site_type_symbol
  _atom_site_fract_x
  _atom_site_fract_y
  _atom_site_fract_z
  _atom_site_U_iso_or_equiv
  _atom_site_adp_type
  _atom_site_occupancy
  _atom_site_site_symmetry_order
  _atom_site_calc_flag
  _atom_site_refinement_flags_posn
  _atom_site_refinement_flags_adp
  _atom_site_refinement_flags_occupancy
  _atom_site_disorder_assembly
  _atom_site_disorder_group
 Co1 Co 0.0000 0.63384(19) -0.16217(19) 0.0363(5) Uani 1 2 d S T P . .
 Co2 Co 0.0000 0.2719(2) -0.06798(18) 0.0336(5) Uani 1 2 d S T P . .
 Co3 Co 0.0000 -0.10355(19) 0.01432(17) 0.0350(5) Uani 1 2 d S T P . .
 O1 O 0.0580(3) 0.2345(7) 0.0532(7) 0.0453(19) Uani 1 1 d . . . . .
 O2 O 0.0589(3) -0.0063(7) 0.0984(7) 0.0390(17) Uani 1 1 d . . . . .
 O3 O 0.4097(3) 0.0734(12) 0.2752(9) 0.081(3) Uani 1 1 d . . . . .
 O4 O 0.4467(2) 0.2262(8) 0.4035(7) 0.0439(19) Uani 1 1 d . U . . .
 O5 O 0.0601(3) 0.5388(9) 0.7505(9) 0.065(3) Uani 1 1 d . . . . .
 O6 O 0.0560(3) 0.3036(9) 0.8088(7) 0.0485(19) Uani 1 1 d . U . . .
 O1W O 0.0000 0.800(3) -0.314(2) 0.156(9) Uani 1 2 d S TU P . .
 H1W H -0.0308 0.8259 -0.3284 0.235 Uiso 1 1 d R . . . .
 O8 O 0.0000 0.5050(12) -0.0153(7) 0.033(2) Uani 1 2 d S TU P . .
 O2W O 0.0000 0.0461(12) -0.1351(9) 0.042(2) Uani 1 2 d S TU P . .
 H2WA H 0.0265 0.0317 -0.1774 0.063 Uiso 0.5 1 d R . . . .
 H2WB H -0.0265 0.0317 -0.1774 0.063 Uiso 0.5 1 d R . . . .
 O10 O 0.0000 0.7041(14) 0.1082(10) 0.055(3) Uani 1 2 d S TU P . .
 C1 C 0.0757(4) 0.1216(10) 0.1052(9) 0.033(2) Uani 1 1 d . U . . .
 C2 C 0.1239(4) 0.1484(11) 0.1794(8) 0.032(2) Uani 1 1 d . . . . .
 C3 C 0.1367(5) 0.2838(11) 0.2166(12) 0.048(3) Uani 1 1 d . . . . .
 H3 H 0.1153 0.3624 0.1988 0.058 Uiso 1 1 calc R . . . .
 C4 C 0.1814(4) 0.3085(11) 0.2812(10) 0.039(2) Uani 1 1 d . . . . .
 H4 H 0.1898 0.4026 0.3059 0.047 Uiso 1 1 calc R . . . .
 C5 C 0.2130(3) 0.1909(11) 0.3080(9) 0.033(2) Uani 1 1 d . . . . .
 C6 C 0.2011(4) 0.0515(11) 0.2663(11) 0.046(3) Uani 1 1 d . . . . .
 H6 H 0.2233 -0.0269 0.2800 0.056 Uiso 1 1 calc R . . . .
 C7 C 0.1557(4) 0.0312(10) 0.2039(9) 0.036(2) Uani 1 1 d . U . . .
 H7 H 0.1466 -0.0622 0.1784 0.043 Uiso 1 1 calc R . . . .
 C8 C 0.2612(3) 0.2158(10) 0.3843(8) 0.0272(19) Uani 1 1 d . U . . .
 C9 C 0.2605(3) 0.2894(11) 0.4917(9) 0.035(2) Uani 1 1 d . . . . .
 C10 C 0.3070(4) 0.3357(14) 0.5459(10) 0.046(3) Uani 1 1 d . . . . .
 H10 H 0.3070 0.3919 0.6140 0.055 Uiso 1 1 calc R . . . .
 C11 C 0.3542(4) 0.2910(13) 0.4898(10) 0.043(3) Uani 1 1 d . . . . .
 H11 H 0.3854 0.3195 0.5230 0.051 Uiso 1 1 calc R . . . .
 C12 C 0.3550(4) 0.2084(12) 0.3897(11) 0.039(2) Uani 1 1 d . U . . .
 C13 C 0.3089(3) 0.1733(11) 0.3341(9) 0.036(2) Uani 1 1 d . . . . .
 H13 H 0.3094 0.1217 0.2637 0.043 Uiso 1 1 calc R . . . .
 C14 C 0.4067(4) 0.1678(14) 0.3498(11) 0.052(3) Uani 1 1 d . . . . .
 C15 C 0.2117(4) 0.3236(12) 0.5507(8) 0.035(2) Uani 1 1 d . . . . .
 C16 C 0.2008(4) 0.4603(12) 0.5926(10) 0.047(3) Uani 1 1 d . . . . .
 H16 H 0.2236 0.5364 0.5767 0.056 Uiso 1 1 calc R . . . .
 C17 C 0.1566(4) 0.4904(12) 0.6586(13) 0.053(3) Uani 1 1 d . . . . .
 H17 H 0.1495 0.5859 0.6821 0.063 Uiso 1 1 calc R . . . .
 C18 C 0.1237(4) 0.3783(10) 0.6885(9) 0.032(2) Uani 1 1 d . . . . .
 C19 C 0.1361(4) 0.2363(11) 0.6497(10) 0.042(3) Uani 1 1 d . . . . .
 H19 H 0.1157 0.1573 0.6721 0.051 Uiso 1 1 calc R . . . .
 C20 C 0.1783(4) 0.2128(12) 0.5788(10) 0.045(3) Uani 1 1 d . . . . .
 H20 H 0.1842 0.1192 0.5492 0.054 Uiso 1 1 calc R . . . .
 C21 C 0.0765(4) 0.4054(11) 0.7586(10) 0.037(2) Uani 1 1 d . U . . .
 C22 C 0.0000 0.567(2) 0.0827(14) 0.056(3) Uani 1 2 d S TU P . .
 H22 H 0.0000 0.5037 0.1469 0.067 Uiso 1 2 calc RS T P . .

loop_
  _atom_site_aniso_label
  _atom_site_aniso_U_11
  _atom_site_aniso_U_22
  _atom_site_aniso_U_33
  _atom_site_aniso_U_23
  _atom_site_aniso_U_13
  _atom_site_aniso_U_12
 Co1 0.0177(8) 0.0248(8) 0.0665(14) -0.0053(9) 0.000 0.000
 Co2 0.0175(7) 0.0575(12) 0.0259(7) 0.0140(9) 0.000 0.000
 Co3 0.0198(9) 0.0302(9) 0.0552(12) -0.0027(9) 0.000 0.000
 O1 0.040(4) 0.037(4) 0.059(5) 0.009(3) -0.026(4) 0.001(3)
 O2 0.033(4) 0.037(4) 0.048(4) 0.003(3) -0.020(3) -0.003(3)
 O3 0.037(4) 0.113(8) 0.093(7) -0.074(7) -0.005(4) 0.005(5)
 O4 0.016(3) 0.052(4) 0.063(5) 0.001(4) -0.005(3) -0.010(3)
 O5 0.042(5) 0.049(5) 0.104(8) -0.008(5) 0.030(5) 0.008(4)
 O6 0.038(4) 0.066(4) 0.041(4) -0.011(4) 0.022(3) 0.006(3)
 O1W 0.066(11) 0.190(18) 0.21(2) 0.083(17) 0.000 0.000
 O8 0.034(5) 0.056(5) 0.010(4) -0.016(3) 0.000 0.000
 O2W 0.024(4) 0.068(6) 0.034(5) 0.012(5) 0.000 0.000
 O10 0.063(6) 0.064(6) 0.037(5) 0.008(5) 0.000 0.000
 C1 0.026(4) 0.040(5) 0.034(5) -0.012(4) -0.015(4) -0.004(4)
 C2 0.023(5) 0.044(5) 0.027(5) -0.009(4) -0.007(4) 0.000(4)
 C3 0.038(6) 0.032(5) 0.075(8) -0.019(5) -0.022(6) 0.011(4)
 C4 0.035(5) 0.026(4) 0.055(7) -0.006(4) -0.013(5) 0.006(4)
 C5 0.021(5) 0.046(5) 0.033(5) -0.006(4) -0.008(4) 0.003(4)
 C6 0.043(6) 0.034(5) 0.062(7) -0.005(5) -0.024(6) 0.018(5)
 C7 0.039(5) 0.027(4) 0.041(5) -0.007(4) -0.019(4) 0.002(4)
 C8 0.022(4) 0.043(5) 0.017(4) 0.012(4) 0.005(3) 0.001(3)
 C9 0.018(4) 0.054(6) 0.033(5) -0.019(4) 0.007(4) -0.009(4)
 C10 0.024(5) 0.076(7) 0.037(6) 0.011(5) -0.006(4) -0.005(5)
 C11 0.018(5) 0.062(7) 0.048(6) 0.018(6) -0.009(4) -0.007(4)
 C12 0.022(4) 0.044(5) 0.052(6) 0.015(5) 0.001(4) 0.005(4)
 C13 0.030(5) 0.048(5) 0.029(5) -0.013(4) 0.007(4) 0.009(4)
 C14 0.034(5) 0.067(7) 0.055(7) -0.017(6) -0.005(5) -0.005(5)
 C15 0.025(5) 0.062(6) 0.019(4) 0.016(4) -0.005(4) -0.007(4)
 C16 0.039(6) 0.048(6) 0.053(7) -0.020(5) 0.013(5) -0.009(5)
 C17 0.035(6) 0.034(5) 0.088(10) 0.000(6) 0.008(6) -0.002(5)
 C18 0.027(5) 0.036(5) 0.033(5) -0.004(4) 0.016(4) -0.001(4)
 C19 0.039(6) 0.036(5) 0.052(7) 0.007(4) 0.031(5) -0.007(4)
 C20 0.028(5) 0.050(6) 0.057(7) -0.018(5) 0.016(5) -0.010(5)
 C21 0.026(4) 0.044(5) 0.042(5) -0.013(4) 0.003(4) -0.002(4)
 C22 0.056(7) 0.072(7) 0.039(6) -0.004(6) 0.000 0.000

_geom_special_details
;
 All esds (except the esd in the dihedral angle between two l.s. planes)
 are estimated using the full covariance matrix.  The cell esds are taken
 into account individually in the estimation of esds in distances, angles
 and torsion angles; correlations between esds in cell parameters are only
 used when they are defined by crystal symmetry.  An approximate (isotropic)
 treatment of cell esds is used for estimating esds involving l.s. planes.
;
loop_
  _geom_bond_atom_site_label_1
  _geom_bond_atom_site_label_2
  _geom_bond_distance
  _geom_bond_site_symmetry_2
  _geom_bond_publ_flag
 Co1 O4 2.026(7) 2_564 ?
 Co1 O4 2.026(7) 4_464 ?
 Co1 O5 2.043(8) 1_554 ?
 Co1 O5 2.043(8) 3_554 ?
 Co1 O1W 2.30(2) . ?
 Co1 O8 2.044(10) . ?
 Co2 O1 2.072(7) 3 ?
 Co2 O1 2.072(7) . ?
 Co2 O6 2.043(7) 3_554 ?
 Co2 O6 2.043(7) 1_554 ?
 Co2 O8 2.208(10) . ?
 Co2 O2W 2.196(12) . ?
 Co3 O2 2.012(7) 3 ?
 Co3 O2 2.012(7) . ?
 Co3 O4 2.182(7) 2_554 ?
 Co3 O4 2.182(7) 4_454 ?
 Co3 O2W 2.182(10) . ?
 Co3 O10 2.054(12) 1_545 ?
 O1 C1 1.273(12) . ?
 O2 C1 1.247(11) . ?
 O3 C14 1.212(14) . ?
 O4 Co1 2.026(7) 2_565 ?
 O4 Co3 2.182(7) 2 ?
 O4 C14 1.318(12) . ?
 O5 Co1 2.043(8) 1_556 ?
 O5 C21 1.292(13) . ?
 O6 Co2 2.043(7) 1_556 ?
 O6 C21 1.213(13) . ?
 O1W H1W 0.8501 . ?
 O8 C22 1.251(19) . ?
 O2W H2WA 0.8501 . ?
 O2W H2WB 0.8501 . ?
 O10 Co3 2.054(12) 1_565 ?
 O10 C22 1.29(2) . ?
 C1 C2 1.531(13) . ?
 C2 C3 1.346(14) . ?
 C2 C7 1.378(13) . ?
 C3 H3 0.9300 . ?
 C3 C4 1.392(15) . ?
 C4 H4 0.9300 . ?
 C4 C5 1.385(13) . ?
 C5 C6 1.390(14) . ?
 C5 C8 1.541(13) . ?
 C6 H6 0.9300 . ?
 C6 C7 1.392(14) . ?
 C7 H7 0.9300 . ?
 C8 C9 1.396(12) . ?
 C8 C13 1.419(12) . ?
 C9 C10 1.421(14) . ?
 C9 C15 1.469(13) . ?
 C10 H10 0.9300 . ?
 C10 C11 1.441(15) . ?
 C11 H11 0.9300 . ?
 C11 C12 1.367(14) . ?
 C12 C13 1.391(14) . ?
 C12 C14 1.464(14) . ?
 C13 H13 0.9300 . ?
 C15 C16 1.364(15) . ?
 C15 C20 1.370(14) . ?
 C16 H16 0.9300 . ?
 C16 C17 1.399(15) . ?
 C17 H17 0.9300 . ?
 C17 C18 1.375(14) . ?
 C18 C19 1.406(13) . ?
 C18 C21 1.483(13) . ?
 C19 H19 0.9300 . ?
 C19 C20 1.376(14) . ?
 C20 H20 0.9300 . ?
 C22 H22 0.9300 . ?

loop_
  _geom_angle_atom_site_label_1
  _geom_angle_atom_site_label_2
  _geom_angle_atom_site_label_3
  _geom_angle
  _geom_angle_site_symmetry_1
  _geom_angle_site_symmetry_3
  _geom_angle_publ_flag
 O4 Co1 O4 86.2(4) 2_564 4_464 ?
 O4 Co1 O5 165.6(3) 2_564 3_554 ?
 O4 Co1 O5 85.7(3) 2_564 1_554 ?
 O4 Co1 O5 85.7(3) 4_464 3_554 ?
 O4 Co1 O5 165.6(3) 4_464 1_554 ?
 O4 Co1 O1W 82.0(6) 2_564 . ?
 O4 Co1 O1W 82.0(6) 4_464 . ?
 O4 Co1 O8 93.4(3) 4_464 . ?
 O4 Co1 O8 93.4(3) 2_564 . ?
 O5 Co1 O5 99.5(6) 3_554 1_554 ?
 O5 Co1 O1W 85.1(6) 3_554 . ?
 O5 Co1 O1W 85.1(6) 1_554 . ?
 O5 Co1 O8 98.9(3) 1_554 . ?
 O5 Co1 O8 98.9(3) 3_554 . ?
 O8 Co1 O1W 173.7(8) . . ?
 O1 Co2 O1 93.3(5) . 3 ?
 O1 Co2 O8 88.7(3) . . ?
 O1 Co2 O8 88.7(3) 3 . ?
 O1 Co2 O2W 94.5(3) 3 . ?
 O1 Co2 O2W 94.5(3) . . ?
 O6 Co2 O1 87.9(3) 1_554 . ?
 O6 Co2 O1 87.9(3) 3_554 3 ?
 O6 Co2 O1 178.0(4) 3_554 . ?
 O6 Co2 O1 178.0(4) 1_554 3 ?
 O6 Co2 O6 90.8(5) 3_554 1_554 ?
 O6 Co2 O8 92.9(3) 1_554 . ?
 O6 Co2 O8 92.9(3) 3_554 . ?
 O6 Co2 O2W 83.8(3) 1_554 . ?
 O6 Co2 O2W 83.8(3) 3_554 . ?
 O2W Co2 O8 175.4(4) . . ?
 O2 Co3 O2 99.1(4) . 3 ?
 O2 Co3 O4 169.8(3) 3 2_554 ?
 O2 Co3 O4 91.0(3) . 2_554 ?
 O2 Co3 O4 91.0(3) 3 4_454 ?
 O2 Co3 O4 169.8(3) . 4_454 ?
 O2 Co3 O2W 95.5(3) . . ?
 O2 Co3 O2W 95.5(3) 3 . ?
 O2 Co3 O10 97.4(3) 3 1_545 ?
 O2 Co3 O10 97.4(3) . 1_545 ?
 O4 Co3 O4 78.8(3) 4_454 2_554 ?
 O2W Co3 O4 82.4(3) . 2_554 ?
 O2W Co3 O4 82.4(3) . 4_454 ?
 O10 Co3 O4 82.2(3) 1_545 4_454 ?
 O10 Co3 O4 82.2(3) 1_545 2_554 ?
 O10 Co3 O2W 160.1(5) 1_545 . ?
 C1 O1 Co2 134.9(6) . . ?
 C1 O2 Co3 135.0(6) . . ?
 Co1 O4 Co3 95.9(2) 2_565 2 ?
 C14 O4 Co1 128.4(7) . 2_565 ?
 C14 O4 Co3 124.2(7) . 2 ?
 C21 O5 Co1 128.1(8) . 1_556 ?
 C21 O6 Co2 138.1(7) . 1_556 ?
 Co1 O1W H1W 109.4 . . ?
 Co1 O8 Co2 109.3(4) . . ?
 C22 O8 Co1 118.2(11) . . ?
 C22 O8 Co2 132.5(11) . . ?
 Co2 O2W H2WA 110.0 . . ?
 Co2 O2W H2WB 110.0 . . ?
 Co3 O2W Co2 108.3(5) . . ?
 Co3 O2W H2WA 110.2 . . ?
 Co3 O2W H2WB 110.2 . . ?
 H2WA O2W H2WB 108.0 . . ?
 C22 O10 Co3 135.6(11) . 1_565 ?
 O1 C1 C2 115.1(8) . . ?
 O2 C1 O1 126.9(9) . . ?
 O2 C1 C2 118.0(9) . . ?
 C3 C2 C1 121.5(9) . . ?
 C3 C2 C7 120.0(9) . . ?
 C7 C2 C1 118.5(8) . . ?
 C2 C3 H3 119.3 . . ?
 C2 C3 C4 121.4(10) . . ?
 C4 C3 H3 119.3 . . ?
 C3 C4 H4 120.5 . . ?
 C5 C4 C3 119.1(9) . . ?
 C5 C4 H4 120.5 . . ?
 C4 C5 C6 120.0(9) . . ?
 C4 C5 C8 119.5(9) . . ?
 C6 C5 C8 120.5(8) . . ?
 C5 C6 H6 120.5 . . ?
 C5 C6 C7 119.0(9) . . ?
 C7 C6 H6 120.5 . . ?
 C2 C7 C6 120.5(9) . . ?
 C2 C7 H7 119.7 . . ?
 C6 C7 H7 119.7 . . ?
 C9 C8 C5 123.7(9) . . ?
 C9 C8 C13 119.8(9) . . ?
 C13 C8 C5 116.2(8) . . ?
 C8 C9 C10 120.8(9) . . ?
 C8 C9 C15 121.0(9) . . ?
 C10 C9 C15 118.2(9) . . ?
 C9 C10 H10 121.7 . . ?
 C9 C10 C11 116.6(10) . . ?
 C11 C10 H10 121.7 . . ?
 C10 C11 H11 118.7 . . ?
 C12 C11 C10 122.6(10) . . ?
 C12 C11 H11 118.7 . . ?
 C11 C12 C13 119.6(10) . . ?
 C11 C12 C14 114.4(10) . . ?
 C13 C12 C14 126.0(10) . . ?
 C8 C13 H13 119.8 . . ?
 C12 C13 C8 120.3(9) . . ?
 C12 C13 H13 119.8 . . ?
 O3 C14 O4 124.2(10) . . ?
 O3 C14 C12 117.2(10) . . ?
 O4 C14 C12 118.4(10) . . ?
 C16 C15 C9 122.2(9) . . ?
 C16 C15 C20 117.4(10) . . ?
 C20 C15 C9 119.8(10) . . ?
 C15 C16 H16 118.8 . . ?
 C15 C16 C17 122.5(10) . . ?
 C17 C16 H16 118.8 . . ?
 C16 C17 H17 120.1 . . ?
 C18 C17 C16 119.9(10) . . ?
 C18 C17 H17 120.1 . . ?
 C17 C18 C19 117.6(9) . . ?
 C17 C18 C21 121.6(9) . . ?
 C19 C18 C21 120.9(8) . . ?
 C18 C19 H19 119.6 . . ?
 C20 C19 C18 120.7(9) . . ?
 C20 C19 H19 119.6 . . ?
 C15 C20 C19 121.7(10) . . ?
 C15 C20 H20 119.1 . . ?
 C19 C20 H20 119.1 . . ?
 O5 C21 C18 113.0(9) . . ?
 O6 C21 O5 127.5(10) . . ?
 O6 C21 C18 119.3(9) . . ?
 O8 C22 O10 129.8(17) . . ?
 O8 C22 H22 115.1 . . ?
 O10 C22 H22 115.1 . . ?

loop_
  _geom_hbond_atom_site_label_D
  _geom_hbond_atom_site_label_H
  _geom_hbond_atom_site_label_A
  _geom_hbond_distance_DH
  _geom_hbond_distance_HA
  _geom_hbond_distance_DA
  _geom_hbond_angle_DHA
  _geom_hbond_site_symmetry_A
 O1W H1W O3 0.85 2.15 2.803(19) 133.2 4_464
 O2W H2WA O3 0.85 1.99 2.781(11) 154.5 2_554
 O2W H2WB O3 0.85 1.99 2.781(11) 154.5 4_454

loop_
  _geom_torsion_atom_site_label_1
  _geom_torsion_atom_site_label_2
  _geom_torsion_atom_site_label_3
  _geom_torsion_atom_site_label_4
  _geom_torsion
  _geom_torsion_site_symmetry_1
  _geom_torsion_site_symmetry_2
  _geom_torsion_site_symmetry_3
  _geom_torsion_site_symmetry_4
  _geom_torsion_publ_flag
 Co1 O4 C14 O3 71.6(16) 2_565 . . . ?
 Co1 O4 C14 C12 -114.5(10) 2_565 . . . ?
 Co1 O5 C21 O6 9.8(19) 1_556 . . . ?
 Co1 O5 C21 C18 -175.6(7) 1_556 . . . ?
 Co1 O8 C22 O10 0.000(3) . . . . ?
 Co2 O1 C1 O2 -3.8(19) . . . . ?
 Co2 O1 C1 C2 173.7(7) . . . . ?
 Co2 O6 C21 O5 -17(2) 1_556 . . . ?
 Co2 O6 C21 C18 168.8(8) 1_556 . . . ?
 Co2 O8 C22 O10 180.000(3) . . . . ?
 Co3 O2 C1 O1 -1.3(19) . . . . ?
 Co3 O2 C1 C2 -178.7(7) . . . . ?
 Co3 O4 C14 O3 -62.7(16) 2 . . . ?
 Co3 O4 C14 C12 111.2(10) 2 . . . ?
 Co3 O10 C22 O8 0.000(5) 1_565 . . . ?
 O1 C1 C2 C3 19.9(16) . . . . ?
 O1 C1 C2 C7 -157.3(10) . . . . ?
 O2 C1 C2 C3 -162.4(11) . . . . ?
 O2 C1 C2 C7 20.4(15) . . . . ?
 C1 C2 C3 C4 -178.1(11) . . . . ?
 C1 C2 C7 C6 177.0(10) . . . . ?
 C2 C3 C4 C5 -0.3(19) . . . . ?
 C3 C2 C7 C6 -0.3(17) . . . . ?
 C3 C4 C5 C6 2.7(18) . . . . ?
 C3 C4 C5 C8 -177.1(10) . . . . ?
 C4 C5 C6 C7 -3.8(18) . . . . ?
 C4 C5 C8 C9 50.5(13) . . . . ?
 C4 C5 C8 C13 -122.8(11) . . . . ?
 C5 C6 C7 C2 2.7(17) . . . . ?
 C5 C8 C9 C10 -166.7(10) . . . . ?
 C5 C8 C9 C15 12.1(14) . . . . ?
 C5 C8 C13 C12 171.8(9) . . . . ?
 C6 C5 C8 C9 -129.3(11) . . . . ?
 C6 C5 C8 C13 57.4(13) . . . . ?
 C7 C2 C3 C4 -0.9(19) . . . . ?
 C8 C5 C6 C7 176.0(9) . . . . ?
 C8 C9 C10 C11 -5.5(15) . . . . ?
 C8 C9 C15 C16 -130.8(11) . . . . ?
 C8 C9 C15 C20 57.7(14) . . . . ?
 C9 C8 C13 C12 -1.9(14) . . . . ?
 C9 C10 C11 C12 0.0(16) . . . . ?
 C9 C15 C16 C17 -173.7(11) . . . . ?
 C9 C15 C20 C19 169.8(10) . . . . ?
 C10 C9 C15 C16 48.0(15) . . . . ?
 C10 C9 C15 C20 -123.4(12) . . . . ?
 C10 C11 C12 C13 4.5(14) . . . . ?
 C10 C11 C12 C14 -176.9(11) . . . . ?
 C11 C12 C13 C8 -3.5(14) . . . . ?
 C11 C12 C14 O3 166.7(11) . . . . ?
 C11 C12 C14 O4 -7.6(15) . . . . ?
 C13 C8 C9 C10 6.4(14) . . . . ?
 C13 C8 C9 C15 -174.8(10) . . . . ?
 C13 C12 C14 O3 -14.7(18) . . . . ?
 C13 C12 C14 O4 171.0(11) . . . . ?
 C14 C12 C13 C8 178.0(10) . . . . ?
 C15 C9 C10 C11 175.7(10) . . . . ?
 C15 C16 C17 C18 3.4(19) . . . . ?
 C16 C15 C20 C19 -2.1(17) . . . . ?
 C16 C17 C18 C19 -0.5(18) . . . . ?
 C16 C17 C18 C21 179.8(11) . . . . ?
 C17 C18 C19 C20 -3.6(18) . . . . ?
 C17 C18 C21 O5 24.1(16) . . . . ?
 C17 C18 C21 O6 -160.8(11) . . . . ?
 C18 C19 C20 C15 5.0(19) . . . . ?
 C19 C18 C21 O5 -155.6(11) . . . . ?
 C19 C18 C21 O6 19.5(17) . . . . ?
 C20 C15 C16 C17 -2.1(17) . . . . ?
 C21 C18 C19 C20 176.1(11) . . . . ?

_shelx_res_file
;
    a.res created by SHELXL-2014/7

TITL A in P2(1) New: Pmn21
CELL 0.71073 25.9703 9.1157 11.3951 90 90 90
ZERR 2 0.0019 0.0007 0.0008 0 0 0
LATT -1
SYMM 0.5-X,-Y,0.5+Z
SYMM -X,+Y,+Z
SYMM 0.5+X,-Y,0.5+Z
SFAC C H Co O
UNIT 86 54 6 32
EQIV $1 -0.5+X,1-Y,-0.5+Z
EQIV $2 0.5-X,-Y,-0.5+Z
EQIV $3 -0.5+X,-Y,-0.5+Z
DELU O6 > O10 C1 C7 C8 C12 O4 C21 C22
SIMU 0.01 0.02 2 O6 > O10 C1 C7 C8 C12 O4 C21 C22
ISOR 0.01 0.02 O6 > O10 C1 C7 C8 C12 O4 C21 C22

L.S. 20
PLAN  5
SIZE 0.28 0.26 0.23
HTAB O1W O3_$1
HTAB O2W O3_$2
HTAB O2W O3_$3
BIND O1W Co1
BOND $H
CONF
HTAB
fmap 2
acta
TWIN -1 0 0 0 -1 0 0 0 -1 2
OMIT -3 51
REM <olex2.extras>
REM <HklSrc "%.\\a.hkL">
REM </olex2.extras>

WGHT    0.070900   11.453400
BASF   0.48937
FVAR       4.47450
CO1   3    0.000000    0.633841   -0.162171    10.50000    0.01768    0.02478 =
         0.06654   -0.00529    0.00000    0.00000
CO2   3    0.000000    0.271929   -0.067982    10.50000    0.01752    0.05754 =
         0.02586    0.01397    0.00000    0.00000
CO3   3    0.000000   -0.103553    0.014323    10.50000    0.01975    0.03022 =
         0.05517   -0.00270    0.00000    0.00000
O1    4    0.057990    0.234457    0.053216    11.00000    0.03960    0.03744 =
         0.05896    0.00911   -0.02626    0.00070
O2    4    0.058948   -0.006341    0.098375    11.00000    0.03252    0.03694 =
         0.04751    0.00286   -0.02013   -0.00328
O3    4    0.409662    0.073391    0.275177    11.00000    0.03735    0.11333 =
         0.09346   -0.07376   -0.00539    0.00550
O4    4    0.446676    0.226163    0.403453    11.00000    0.01642    0.05191 =
         0.06322    0.00127   -0.00501   -0.00962
O5    4    0.060066    0.538815    0.750481    11.00000    0.04152    0.04867 =
         0.10427   -0.00809    0.02980    0.00812
O6    4    0.056039    0.303597    0.808758    11.00000    0.03843    0.06630 =
         0.04068   -0.01134    0.02200    0.00606
O1W   4    0.000000    0.800113   -0.313550    10.50000    0.06630    0.18975 =
         0.21331    0.08271    0.00000    0.00000
AFIX   3
H1W   2   -0.030780    0.825863   -0.328380    11.00000   -1.50000
AFIX   0
O8    4    0.000000    0.505037   -0.015312    10.50000    0.03403    0.05626 =
         0.01015   -0.01564    0.00000    0.00000
O2W   4    0.000000    0.046122   -0.135143    10.50000    0.02363    0.06841 =
         0.03362    0.01243    0.00000    0.00000
AFIX   3
H2WA  2    0.026490    0.031662   -0.177413    10.50000   -1.50000
H2WB  2   -0.026490    0.031662   -0.177413    10.50000   -1.50000
AFIX   0
O10   4    0.000000    0.704083    0.108177    10.50000    0.06322    0.06398 =
         0.03735    0.00786    0.00000    0.00000
C1    1    0.075692    0.121624    0.105183    11.00000    0.02610    0.03978 =
         0.03425   -0.01218   -0.01457   -0.00433
C2    1    0.123899    0.148425    0.179420    11.00000    0.02327    0.04437 =
         0.02704   -0.00911   -0.00666    0.00030
C3    1    0.136694    0.283759    0.216586    11.00000    0.03778    0.03184 =
         0.07532   -0.01853   -0.02186    0.01148
AFIX  43
H3    2    0.115252    0.362375    0.198767    11.00000   -1.20000
AFIX   0
C4    1    0.181369    0.308465    0.281154    11.00000    0.03537    0.02643 =
         0.05482   -0.00640   -0.01347    0.00628
AFIX  43
H4    2    0.189839    0.402625    0.305940    11.00000   -1.20000
AFIX   0
C5    1    0.213027    0.190862    0.307967    11.00000    0.02084    0.04611 =
         0.03297   -0.00587   -0.00784    0.00255
C6    1    0.201149    0.051535    0.266323    11.00000    0.04273    0.03446 =
         0.06219   -0.00459   -0.02363    0.01798
AFIX  43
H6    2    0.223264   -0.026865    0.280001    11.00000   -1.20000
AFIX   0
C7    1    0.155651    0.031218    0.203851    11.00000    0.03925    0.02673 =
         0.04070   -0.00728   -0.01913    0.00213
AFIX  43
H7    2    0.146605   -0.062222    0.178387    11.00000   -1.20000
AFIX   0
C8    1    0.261221    0.215768    0.384334    11.00000    0.02157    0.04346 =
         0.01656    0.01210    0.00460    0.00117
C9    1    0.260495    0.289409    0.491746    11.00000    0.01820    0.05424 =
         0.03305   -0.01890    0.00724   -0.00882
C10   1    0.307046    0.335688    0.545861    11.00000    0.02371    0.07615 =
         0.03665    0.01058   -0.00588   -0.00464
AFIX  43
H10   2    0.307049    0.391903    0.613968    11.00000   -1.20000
AFIX   0
C11   1    0.354225    0.291040    0.489787    11.00000    0.01769    0.06245 =
         0.04787    0.01837   -0.00909   -0.00663
AFIX  43
H11   2    0.385369    0.319538    0.522999    11.00000   -1.20000
AFIX   0
C12   1    0.355022    0.208434    0.389684    11.00000    0.02151    0.04409 =
         0.05189    0.01535    0.00102    0.00451
C13   1    0.308942    0.173300    0.334106    11.00000    0.03028    0.04840 =
         0.02873   -0.01258    0.00700    0.00936
AFIX  43
H13   2    0.309421    0.121731    0.263694    11.00000   -1.20000
AFIX   0
C14   1    0.406663    0.167796    0.349751    11.00000    0.03404    0.06681 =
         0.05495   -0.01670   -0.00542   -0.00457
C15   1    0.211663    0.323642    0.550739    11.00000    0.02520    0.06217 =
         0.01890    0.01622   -0.00526   -0.00692
C16   1    0.200767    0.460334    0.592595    11.00000    0.03867    0.04792 =
         0.05295   -0.01982    0.01305   -0.00950
AFIX  43
H16   2    0.223572    0.536434    0.576668    11.00000   -1.20000
AFIX   0
C17   1    0.156593    0.490387    0.658564    11.00000    0.03517    0.03448 =
         0.08841   -0.00042    0.00786   -0.00158
AFIX  43
H17   2    0.149505    0.585948    0.682144    11.00000   -1.20000
AFIX   0
C18   1    0.123666    0.378332    0.688479    11.00000    0.02669    0.03579 =
         0.03302   -0.00352    0.01607   -0.00103
C19   1    0.136149    0.236275    0.649657    11.00000    0.03888    0.03554 =
         0.05228    0.00674    0.03103   -0.00705
AFIX  43
H19   2    0.115717    0.157330    0.672106    11.00000   -1.20000
AFIX   0
C20   1    0.178262    0.212794    0.578823    11.00000    0.02799    0.05046 =
         0.05734   -0.01840    0.01649   -0.00965
AFIX  43
H20   2    0.184198    0.119222    0.549249    11.00000   -1.20000
AFIX   0
C21   1    0.076514    0.405385    0.758578    11.00000    0.02623    0.04377 =
         0.04184   -0.01284    0.00347   -0.00208
C22   1    0.000000    0.566739    0.082723    10.50000    0.05607    0.07235 =
         0.03879   -0.00351    0.00000    0.00000
AFIX  43
H22   2    0.000000    0.503704    0.146896    10.50000   -1.20000
AFIX   0
HKLF 4 1 0 0 1 1 0 0 0 1 0

REM  A in P2(1) New: Pmn21
REM R1 =  0.0674 for    4716 Fo > 4sig(Fo)  and  0.0715 for all    5113 data
REM    293 parameters refined using     95 restraints

END

WGHT      0.0708     11.4578

REM Instructions for potential hydrogen bonds
HTAB O1W O3_$1
HTAB O2W O3_$2
HTAB O2W O3_$3

REM Highest difference peak  0.983,  deepest hole -1.080,  1-sigma level  0.109
Q1    1   0.0000  0.7545  0.1994  10.50000  0.05    0.98
Q2    1   0.0000  0.1184 -0.2368  10.50000  0.05    0.79
Q3    1   0.0000  0.7516 -0.3370  10.50000  0.05    0.75
Q4    1   0.0000  0.3630  0.7498  10.50000  0.05    0.68
Q5    1   0.5000  0.1590  0.3837  10.50000  0.05    0.66
;
_shelx_res_checksum                88315
_shelx_hkl_file
;
   2   0   0  471542   15269                                                      897494  -58.10    0.01  1.0000
  -2   0   0  490446   15491                                                      923506  -58.10   -0.01  1.0000
  -3   0   0   10837     414                                                        7679   -3.68    0.00  1.0000
   3   0   0   12531     443                                                        9115   -3.68    0.00  1.0000
  -4   0   0   70677    1921                                                       84280    5.45    0.00  1.0000
   4   0   0   71984    1842                                                       85708    5.45    0.00  1.0000
  -4   0   0   72798    1573                                                       86595    5.45    0.00  1.0000
  -5   0   0   13798     745                                                       16137   -2.14    0.01  1.0000
   5   0   0   16344     745                                                       18882   -2.14   -0.01  1.0000
  -6   0   0    1633     531                                                        5052    7.11   -0.01  1.0000
   6   0   0    1339     492                                                        4516    7.11    0.01  1.0000
  -7   0   0    1468     414                                                         945    1.69    0.01  1.0000
   7   0   0    1893     429                                                        1292    1.69   -0.01  1.0000
  -8   0   0   17758    1072                                                       16971   -0.67   -0.01  1.0000
   8   0   0   20086    1055                                                       19251   -0.67    0.01  1.0000
  -9   0   0       1     429                                                        -213    0.26    0.01  1.0000
   9   0   0     436     507                                                         486    0.26   -0.01  1.0000
  10   0   0    4670     877                                                        7622    4.23    0.00  1.0000
 -10   0   0    5722     956                                                        8951    4.23    0.00  1.0000
 -11   0   0      12     633                                                         -71    0.77    0.00  1.0000
  11   0   0     478     673                                                         639    0.77    0.00  1.0000
  -1   1   0  748570    2975                                                      163262  -54.48  -88.40  1.0000
   1   1   0  755283    2887                                                      166344   54.52   88.40  1.0000
   1   1   0  759505    2905                                                      168341   54.52   88.40  1.0000
   1   1   0  752028    2944                                                      164809   54.52   88.40  1.0000
   1  -1   0  761259    2911                                                      169558  -54.48   88.40  1.0000
   2   1   0  220617    4507                                                      266013   -9.40    6.70  1.0000
   2   1   0  216956    4534                                                      261987   -9.40    6.70  1.0000
   2   1   0  213648    4628                                                      258346   -9.40    6.70  1.0000
   2  -1   0  218489    4563                                                      263160    9.40    6.70  1.0000
  -2   1   0  219477    4687                                                      264721    9.40   -6.70  1.0000
   3  -1   0   42983    1952                                                       93588   10.11  -20.54  1.0000
   3   1   0   48214    2002                                                      101296  -10.09  -20.53  1.0000
   3   1   0   46453    1840                                                       98720  -10.09  -20.53  1.0000
  -3   1   0   46996    2054                                                       99564   10.11   20.54  1.0000
   3   1   0   45371    1934                                                       97131  -10.09  -20.53  1.0000
   4   1   0   20113     899                                                       31273    7.71    1.23  1.0000
   4   1   0   21404     778                                                       32878    7.71    1.23  1.0000
  -4   1   0   20144     977                                                       31340   -7.73   -1.21  1.0000
   4  -1   0   19762     937                                                       30862   -7.73    1.21  1.0000
   5  -1   0   24651     830                                                       20499    1.74   -2.57  1.0000
  -5   1   0   25485     882                                                       21274    1.74    2.57  1.0000
   5   1   0   24601     807                                                       20489   -1.70   -2.57  1.0000
  -5  -1   0   25543     839                                                       21337   -1.70    2.57  1.0000
  -6   1   0   21071    1039                                                       25411    3.59    0.29  1.0000
   6  -1   0   22166    1026                                                       26823    3.59   -0.29  1.0000
  -6  -1   0   20878    1037                                                       25418   -3.60    0.29  1.0000
   6   1   0   20867     958                                                       25201   -3.60   -0.29  1.0000
   7   1   0   10432     648                                                        8507    2.19    0.28  1.0000
  -7   1   0   10631     727                                                        8700   -2.17   -0.27  1.0000
   7  -1   0    9876     645                                                        8019   -2.17    0.27  1.0000
  -7  -1   0    7616     603                                                        5986    2.19   -0.28  1.0000
  -8  -1   0   23875    1221                                                       23990    0.09   -0.06  1.0000
   8  -1   0   25025    1139                                                       25137   -0.10    0.05  1.0000
   8   1   0   27318    1216                                                       27441    0.09    0.06  1.0000
  -8   1   0   24509    1263                                                       24620   -0.10   -0.05  1.0000
   9  -1   0    3718     611                                                        3507   -0.65    0.34  1.0000
   9   1   0    4670     672                                                        4383    0.66    0.35  1.0000
  -9   1   0    5015     720                                                        4722   -0.65   -0.34  1.0000
  -9  -1   0    4150     697                                                        3924    0.66   -0.35  1.0000
  10  -1   0     965     640                                                        1472   -1.28    3.27  1.0000
 -10  -1   0    1002     638                                                        1523    1.28   -3.28  1.0000
 -10   1   0    1359     681                                                        2201   -1.28   -3.27  1.0000
  10   1   0     474     612                                                         937    1.28    3.28  1.0000
 -11  -1   0    4233     829                                                        3831   -0.38   -0.88  1.0000
 -11   1   0    2014     780                                                        1742    0.39   -0.88  1.0000
  11  -1   0    3113     797                                                        2771    0.39    0.88  1.0000
  11   1   0    3118     760                                                        2777   -0.38    0.88  1.0000
   0   2   0   27257    4298                                                      246797   54.98  -86.23  1.0000
   0   2   0   28046    4372                                                      252700   54.98  -86.23  1.0000
   0  -2   0   28373    4272                                                      249358   54.98   86.23  1.0000
  -1  -2   0    4388     565                                                       23359   19.34   -1.59  1.0000
  -1   2   0    4534     538                                                       23259   19.34    1.58  1.0000
   1   2   0    4400     558                                                       22955   19.34    1.59  1.0000
   1  -2   0    4600     601                                                       23844   19.34   -1.58  1.0000
  -1   2   0    4565     616                                                       23331   19.34    1.58  1.0000
   1   2   0    4571     610                                                       23349   19.34    1.59  1.0000
   2   2   0  354795   10946                                                      646487  -30.27   35.26  1.0000
  -2   2   0  352077   11245                                                      642809  -30.28   35.25  1.0000
   2   2   0  361448   11176                                                      655457  -30.27   35.26  1.0000
   2   2   0  369966   11001                                                      666911  -30.27   35.26  1.0000
   2  -2   0  361219   11001                                                      655146  -30.28  -35.25  1.0000
   3   2   0   12167     832                                                       32276  -12.54   -9.05  1.0000
   3   2   0   11674     867                                                       31470  -12.54   -9.05  1.0000
   3   2   0   12739     853                                                       33203  -12.54   -9.05  1.0000
   3  -2   0   11954     886                                                       31911  -12.55    9.04  1.0000
  -3   2   0   11636     929                                                       31406  -12.55   -9.04  1.0000
   4   2   0   28887     956                                                       31646    2.67   -2.64  1.0000
  -4   2   0   28962    1023                                                       31716    2.67   -2.64  1.0000
   4  -2   0   27723     952                                                       30494    2.67    2.64  1.0000
   4   2   0   29842     927                                                       32649    2.67   -2.64  1.0000
   4   2   0   28520     858                                                       31260    2.67   -2.64  1.0000
   5   2   0   64184    1222                                                       43654    6.87    9.39  1.0000
   5  -2   0   64582    1316                                                       45250    6.87   -9.39  1.0000
  -5   2   0   66443    1365                                                       45521    6.87    9.39  1.0000
   5   2   0   67334    1138                                                       46277    6.87    9.39  1.0000
   5   2   0   69536    1322                                                       48118    6.87    9.39  1.0000
  -6  -2   0   22519     890                                                       18362    2.98    1.28  1.0000
  -6   2   0   21254     913                                                       17272    2.97   -1.30  1.0000
   6   2   0   23212     856                                                       19036    2.98   -1.28  1.0000
   6  -2   0   20690     831                                                       16718    2.97    1.30  1.0000
  -7  -2   0   13393     780                                                       11489   -2.36    1.35  1.0000
   7   2   0   13328     764                                                       11454   -2.36   -1.35  1.0000
  -7   2   0   12505     816                                                       10696   -2.38   -1.34  1.0000
   7  -2   0   13562     797                                                       11653   -2.38    1.34  1.0000
   8   2   0   13044     863                                                       11395   -0.81   -2.52  1.0000
  -8  -2   0   12277     838                                                       10660   -0.81    2.52  1.0000
  -8   2   0   10358     856                                                        8877   -0.81   -2.53  1.0000
   8  -2   0   12483     833                                                       10843   -0.81    2.53  1.0000
  -9   2   0   24942    1345                                                       23834   -1.45    0.38  1.0000
   9   2   0   25201    1210                                                       24088   -1.44    0.37  1.0000
  -9  -2   0   27021    1326                                                       25789   -1.44   -0.37  1.0000
   9  -2   0   23834    1223                                                       22674   -1.45   -0.38  1.0000
  10   2   0    7818     885                                                        8568    1.31   -0.36  1.0000
  10  -2   0    5719     859                                                        6450    1.30    0.36  1.0000
 -10  -2   0    6045     878                                                        6801    1.31    0.36  1.0000
 -10   2   0    7241     970                                                        7958    1.30   -0.36  1.0000
   1   3   0  102883    3881                                                      216762   37.22   -4.82  1.0000
   1   3   0  105022    3924                                                      219940   37.22   -4.82  1.0000
  -1   3   0  105666    3843                                                      220828  -37.20    4.81  1.0000
  -1   3   0  102414    3969                                                      215999  -37.20    4.81  1.0000
   1  -3   0   98672    3864                                                      214700  -37.20   -4.81  1.0000
  -1  -3   0  102862    3840                                                      221057   37.22    4.82  1.0000
  -2   3   0   39262     662                                                       17334    1.58  -16.11  1.0000
   2   3   0   37395     603                                                       16086   -1.63   16.13  1.0000
   2  -3   0   39412     639                                                       17723    1.58   16.11  1.0000
   2   3   0   39591     580                                                       17563   -1.63   16.13  1.0000
  -2   3   0   39647     509                                                       17595    1.58  -16.11  1.0000
   2   3   0   42698     608                                                       19687   -1.63   16.13  1.0000
  -3   3   0   34892     737                                                       19739   13.58   -3.78  1.0000
   3   3   0   37279     688                                                       21617  -13.56    3.78  1.0000
   3   3   0   34972     671                                                       19809  -13.56    3.78  1.0000
   3  -3   0   36658     744                                                       20673   13.58    3.78  1.0000
   3   3   0   35977     702                                                       20594  -13.56    3.78  1.0000
  -4   3   0  209599    5323                                                      277909   -6.24   15.26  1.0000
   4  -3   0  218304    5185                                                      288209   -6.24  -15.26  1.0000
   4   3   0  209064    5067                                                      277216    6.23  -15.25  1.0000
   4   3   0  212039    5179                                                      280644    6.23  -15.25  1.0000
   4   3   0  213595    5092                                                      282436    6.23  -15.25  1.0000
   5   3   0   33437    1040                                                       32638   -0.58   -0.20  1.0000
   5   3   0   33391    1074                                                       32593   -0.58   -0.20  1.0000
  -5   3   0   33971    1189                                                       33146    0.59    0.20  1.0000
   5  -3   0   35180    1112                                                       34362    0.59   -0.20  1.0000
   5   3   0   34905    1018                                                       34089   -0.58   -0.20  1.0000
   6  -3   0  128577    3224                                                      147904   -1.21    6.90  1.0000
   6   3   0  127722    3207                                                      146731    1.19    6.89  1.0000
  -6   3   0  127810    3380                                                      146808   -1.21   -6.90  1.0000
   6   3   0  130915    3151                                                      150156    1.19    6.89  1.0000
   6   3   0  141002    3066                                                      160958    1.19    6.89  1.0000
  -7  -3   0   16765     931                                                       17450    0.22   -1.89  1.0000
   7  -3   0   15877     949                                                       16530   -0.21    1.90  1.0000
  -7   3   0   17951    1040                                                       18513   -0.21   -1.90  1.0000
   7   3   0   17574     921                                                       18143    0.22    1.89  1.0000
  -8  -3   0    4638     644                                                        4948   -0.01    0.91  1.0000
   8   3   0    2855     572                                                        3085   -0.01   -0.91  1.0000
  -8   3   0    3241     624                                                        3491    0.00    0.92  1.0000
   8  -3   0    2896     594                                                        3144    0.00   -0.92  1.0000
   9  -3   0    6990     812                                                        6958   -1.74   -0.76  1.0000
   9   3   0    7130     774                                                        7122    1.75   -0.78  1.0000
  -9  -3   0    6779     769                                                        6742    1.75    0.78  1.0000
  -9   3   0    5931     833                                                        5921   -1.74    0.76  1.0000
 -10   3   0    8854     986                                                        7911   -1.14   -0.78  1.0000
  10  -3   0   10370     978                                                        9329   -1.14    0.78  1.0000
 -10  -3   0    9451     936                                                        8452    1.13   -0.79  1.0000
  10   3   0    7399     827                                                        6533    1.13    0.79  1.0000
   0  -4   0  132017    1628                                                       78407  -12.43   19.65  1.0000
   0   4   0  133761    1697                                                       79750  -12.43  -19.65  1.0000
   0   4   0  134363    1661                                                       80224  -12.43  -19.65  1.0000
   1   4   0    3703     296                                                        3540    1.88    2.24  1.0000
   1   4   0    3701     315                                                        3538    1.88    2.24  1.0000
  -1   4   0    3553     289                                                        3391    1.86    2.22  1.0000
  -1   4   0    3370     343                                                        3208    1.86    2.22  1.0000
  -1  -4   0    3917     296                                                        3526    1.88   -2.24  1.0000
   1  -4   0    3954     317                                                        3565    1.86   -2.22  1.0000
   2   4   0   32111    1072                                                       43219    3.71    8.76  1.0000
   2   4   0   33632    1188                                                       45004    3.71    8.76  1.0000
  -2   4   0   35221    1219                                                       46871    3.72    8.76  1.0000
  -2  -4   0   33830    1084                                                       44498    3.71   -8.76  1.0000
   2  -4   0   35956    1153                                                       46974    3.72   -8.76  1.0000
  -2   4   0   34917    1062                                                       46516    3.72    8.76  1.0000
   3   4   0   30271     980                                                       34545  -10.76    9.69  1.0000
  -3   4   0   30244    1077                                                       34536  -10.75    9.70  1.0000
   3  -4   0   31405    1058                                                       36437  -10.75   -9.70  1.0000
   3   4   0   30804    1056                                                       35153  -10.76    9.69  1.0000
   3   4   0   30244     973                                                       34515  -10.76    9.69  1.0000
  -3   4   0   32653     862                                                       37277  -10.75    9.70  1.0000
   4   4   0   67908    2157                                                       97840   -2.84  -11.29  1.0000
   4  -4   0   68032    2190                                                       97991   -2.85   11.30  1.0000
   4   4   0   67807    2086                                                       97719   -2.84  -11.29  1.0000
   4   4   0   68964    2122                                                       99107   -2.84  -11.29  1.0000
  -4   4   0   65492    2259                                                       94958   -2.85  -11.30  1.0000
   5  -4   0  134289    2501                                                      109876    7.35    3.30  1.0000
   5   4   0  138755    2478                                                      114322    7.34   -3.30  1.0000
  -5   4   0  131727    2618                                                      107935    7.35   -3.30  1.0000
   5   4   0  135527    2398                                                      111392    7.34   -3.30  1.0000
   5   4   0  137688    2441                                                      113353    7.34   -3.30  1.0000
   6   4   0   30868    1171                                                       32107   -1.86   -0.58  1.0000
   6  -4   0   29734    1181                                                       30883   -1.86    0.59  1.0000
   6   4   0   28512    1110                                                       29701   -1.86   -0.58  1.0000
   6   4   0   29134    1073                                                       30336   -1.86   -0.58  1.0000
  -6   4   0   27518    1233                                                       28669   -1.86   -0.59  1.0000
  -7   4   0   18641     884                                                       12550   -3.04    4.54  1.0000
   7  -4   0   19278     884                                                       13075   -3.04   -4.54  1.0000
   7   4   0   18681     818                                                       12591   -3.03    4.54  1.0000
   7   4   0   17900     795                                                       11951   -3.03    4.54  1.0000
   8   4   0    8052     905                                                       13379   -6.07   -0.70  1.0000
   8  -4   0    7916     913                                                       13236   -6.06    0.72  1.0000
  -8  -4   0    7087     884                                                       12154   -6.07    0.70  1.0000
  -8   4   0    8268    1040                                                       13658   -6.06   -0.72  1.0000
  -9  -4   0    6169     726                                                        5327   -0.84    1.29  1.0000
  -9   4   0    7864     881                                                        6911   -0.85   -1.28  1.0000
   9   4   0    6302     725                                                        5447   -0.84   -1.29  1.0000
   9  -4   0    7864     813                                                        6915   -0.85    1.28  1.0000
  10   4   0    4651     835                                                        5452    0.87    1.73  1.0000
  10  -4   0    5492     839                                                        6160    0.86   -1.71  1.0000
 -10   4   0    5513     975                                                        6375    0.86    1.71  1.0000
 -10  -4   0    4849     822                                                        5484    0.87   -1.73  1.0000
   1   5   0   88459    1829                                                       88587   -1.59   -5.58  1.0000
   1  -5   0   84870    1858                                                       85878    1.59   -5.57  1.0000
  -1   5   0   85031    1918                                                       85140    1.59    5.57  1.0000
  -1   5   0   88759    1887                                                       88885    1.59    5.57  1.0000
  -1  -5   0   84199    1819                                                       85205   -1.59    5.58  1.0000
   1   5   0   88132    1958                                                       88258   -1.59   -5.58  1.0000
  -2   5   0   21935     601                                                       15615   -4.86   -1.91  1.0000
   2  -5   0   20736     669                                                       14542   -4.86    1.91  1.0000
  -2  -5   0   20034     610                                                       13973    4.83   -1.94  1.0000
   2   5   0   21334     604                                                       15121    4.83    1.94  1.0000
   2   5   0   21154     678                                                       14970    4.83    1.94  1.0000
  -2   5   0   21794     735                                                       15496   -4.86   -1.91  1.0000
   3  -5   0   31346     814                                                       20235    3.85    7.25  1.0000
  -3   5   0   30009     859                                                       19151    3.85   -7.25  1.0000
   3   5   0   30068     801                                                       19216   -3.84    7.24  1.0000
  -3  -5   0   30439     737                                                       19524   -3.84   -7.24  1.0000
   3   5   0   31336     737                                                       20236   -3.84    7.24  1.0000
  -3   5   0   29016     639                                                       18357    3.85   -7.25  1.0000
   4   5   0   65319    1831                                                       77177   -8.47   -3.21  1.0000
   4   5   0   70489    1844                                                       82834   -8.47   -3.21  1.0000
  -4   5   0   67495    1633                                                       79539    8.43    3.21  1.0000
   4   5   0   69015    1964                                                       81223   -8.47   -3.21  1.0000
   4  -5   0   68133    1951                                                       80070    8.43   -3.21  1.0000
  -4   5   0   66304    2030                                                       78235    8.43    3.21  1.0000
   5   5   0   76915    1608                                                       59135    6.72   -4.14  1.0000
   5  -5   0   68678    1570                                                       51877   -6.72   -4.13  1.0000
  -5   5   0   74653    1729                                                       57159   -6.72    4.13  1.0000
   5   5   0   73747    1513                                                       56360    6.72   -4.14  1.0000
   5   5   0   76171    1562                                                       58483    6.72   -4.14  1.0000
   6   5   0    8372     710                                                       10039    2.16    1.39  1.0000
   6   5   0    8857     734                                                       10571    2.16    1.39  1.0000
   6  -5   0    9100     742                                                       10852   -2.18    1.38  1.0000
   6   5   0    9957     744                                                       11773    2.16    1.39  1.0000
  -6   5   0    9277     855                                                       11033   -2.18   -1.38  1.0000
   7   5   0   19305     983                                                       19919   -0.66    0.23  1.0000
   7   5   0   18409     978                                                       19008   -0.66    0.23  1.0000
   7   5   0   16413     948                                                       16979   -0.66    0.23  1.0000
   7  -5   0   17658    1032                                                       18242    0.66    0.24  1.0000
  -7   5   0   18331    1145                                                       18941    0.66   -0.24  1.0000
  -8  -5   0    1181     474                                                         817   -3.93    0.47  1.0000
  -8   5   0     950     583                                                         604    3.91    0.47  1.0000
   8   5   0     536     471                                                         205   -3.93   -0.47  1.0000
   8  -5   0     878     489                                                         523    3.91   -0.47  1.0000
  -9   5   0     360     560                                                        -563   -0.45    4.21  1.0000
  -9  -5   0     495     488                                                         702    0.45    4.24  1.0000
   9  -5   0     813     593                                                        1185   -0.45   -4.21  1.0000
   9   5   0     770     539                                                         626    0.45   -4.24  1.0000
  10  -5   0    6243     871                                                        5038   -1.43   -1.23  1.0000
 -10   5   0    5216     911                                                        4096   -1.43    1.23  1.0000
 -10  -5   0    4288     705                                                        3304    1.42    1.22  1.0000
  10   5   0    3763     724                                                        2826    1.42   -1.22  1.0000
   0   6   0    6910     634                                                       12708    3.81    5.41  1.0000
   0  -6   0    6707     638                                                       12450    3.81   -5.41  1.0000
   0   6   0    6376     626                                                       11980    3.81    5.41  1.0000
   1   6   0    4656     496                                                        7147    3.15    4.49  1.0000
  -1   6   0    5230     553                                                        7869    3.13    4.48  1.0000
   1   6   0    4544     534                                                        7004    3.15    4.49  1.0000
  -1   6   0    4335     514                                                        6731    3.13    4.48  1.0000
  -1  -6   0    4957     526                                                        7511    3.15   -4.49  1.0000
   1  -6   0    4782     534                                                        7284    3.13   -4.48  1.0000
  -2   6   0    1465     289                                                        1547    3.65    0.65  1.0000
  -2   6   0    1342     419                                                        1407    3.65    0.65  1.0000
  -2  -6   0    1453     299                                                        1350    3.64   -0.65  1.0000
   2   6   0    2037     378                                                        2184    3.64    0.65  1.0000
   2  -6   0    2314     371                                                        2263    3.65   -0.65  1.0000
   2   6   0    1711     315                                                        1822    3.64    0.65  1.0000
  -3   6   0    9462     733                                                        9640    6.85   -2.00  1.0000
  -3  -6   0   10641     594                                                       10890    6.84    2.00  1.0000
   3   6   0    9989     595                                                       10197    6.84   -2.00  1.0000
   3   6   0   10352     687                                                       10583    6.84   -2.00  1.0000
  -3   6   0    9813     539                                                       10014    6.85   -2.00  1.0000
   3  -6   0    9812     664                                                       10013    6.85    2.00  1.0000
  -4   6   0   94116    2209                                                      108698   -2.81   -6.09  1.0000
  -4  -6   0   97282    2398                                                      110774   -2.81    6.08  1.0000
   4   6   0   92619    2539                                                      107094   -2.81   -6.08  1.0000
   4  -6   0   94274    2482                                                      107545   -2.81    6.09  1.0000
  -4   6   0   93066    2618                                                      107567   -2.81   -6.09  1.0000
   4   6   0   94452    2366                                                      109068   -2.81   -6.08  1.0000
   5  -6   0   15533     793                                                       12959   -5.71    7.31  1.0000
   5   6   0   15910     791                                                       13326   -5.72   -7.32  1.0000
   5   6   0   16148     752                                                       13557   -5.72   -7.32  1.0000
   5   6   0   18794     864                                                       16126   -5.72   -7.32  1.0000
  -5   6   0   18299     972                                                       15645   -5.71   -7.31  1.0000
   6   6   0   15157     925                                                       18974    3.78    2.99  1.0000
  -6   6   0   14621    1105                                                       18373    3.79    2.97  1.0000
   6   6   0   16090    1018                                                       20024    3.78    2.99  1.0000
   6  -6   0   13946     968                                                       17505    3.79   -2.97  1.0000
   6   6   0   15382     936                                                       19227    3.78    2.99  1.0000
   7   6   0   12840     876                                                       13262   -2.92    1.94  1.0000
   7   6   0   12556     876                                                       12971   -2.92    1.94  1.0000
  -7   6   0   12927    1048                                                       13359   -2.91    1.93  1.0000
   7  -6   0   13321     911                                                       14160   -2.91   -1.93  1.0000
   7   6   0   11860     860                                                       12256   -2.92    1.94  1.0000
  -8   6   0    5124     801                                                        4873   -2.45    0.84  1.0000
   8   6   0    3927     657                                                        3691   -2.48    0.85  1.0000
   8   6   0    4852     656                                                        4605   -2.48    0.85  1.0000
   8  -6   0    4535     630                                                        4195   -2.45   -0.84  1.0000
  -9   6   0    3857     860                                                        4467   -2.05   -1.01  1.0000
  -9  -6   0    4086     715                                                        4849   -2.06    1.03  1.0000
   9  -6   0    4229     751                                                        5009   -2.05    1.01  1.0000
   1   7   0   93059    2147                                                       87849    1.96    2.46  1.0000
  -1   7   0   94357    2092                                                       89079   -1.97   -2.48  1.0000
  -1   7   0   93194    2079                                                       87948   -1.97   -2.48  1.0000
  -1  -7   0   90533    1979                                                       85444    1.96   -2.46  1.0000
   1  -7   0   92246    2017                                                       87078   -1.97    2.48  1.0000
   1   7   0   92308    1966                                                       87118    1.96    2.46  1.0000
   2   7   0    6108     485                                                        6096   -0.49   -2.63  1.0000
  -2   7   0    6746     517                                                        6745    0.49    2.63  1.0000
   2   7   0    5364     564                                                        5343   -0.49   -2.63  1.0000
  -2   7   0    6222     597                                                        6215    0.49    2.63  1.0000
  -2  -7   0    5770     514                                                        6217   -0.49    2.63  1.0000
   2  -7   0    5483     527                                                        5920    0.49   -2.63  1.0000
   3  -7   0   15485     978                                                       22837    2.56    5.51  1.0000
   3   7   0   15405     884                                                       22714   -2.55    5.49  1.0000
   3   7   0   15721    1019                                                       23098   -2.55    5.49  1.0000
  -3   7   0   16443    1126                                                       23997    2.56   -5.51  1.0000
  -3  -7   0   15386     893                                                       22691   -2.55   -5.49  1.0000
  -3   7   0   16846     895                                                       24484    2.56   -5.51  1.0000
   4   7   0   20224     928                                                       23318    4.67    5.27  1.0000
   4   7   0   18368    1051                                                       21279    4.67    5.27  1.0000
   4  -7   0   19050     978                                                       22113   -4.68    5.27  1.0000
  -4  -7   0   18769     908                                                       21788    4.67   -5.27  1.0000
  -4   7   0   20712    1156                                                       23869   -4.68   -5.27  1.0000
   5   7   0    1801     399                                                        1334   -1.37    0.25  1.0000
   5   7   0    1928     448                                                        1444   -1.37    0.25  1.0000
   5  -7   0    1580     453                                                        1152    1.37    0.27  1.0000
  -5  -7   0    3126     435                                                        2518   -1.37   -0.25  1.0000
  -5   7   0    2092     585                                                        1582    1.37   -0.27  1.0000
   6   7   0   17057     875                                                       13385    5.64    0.50  1.0000
  -6   7   0   16909    1037                                                       13250   -5.64   -0.50  1.0000
  -6  -7   0   16344     850                                                       12985    5.64   -0.50  1.0000
   6  -7   0   17209     929                                                       13766   -5.64    0.50  1.0000
   6   7   0   17112     913                                                       13435    5.64    0.50  1.0000
   7   7   0   15138     950                                                       14188    2.70    0.61  1.0000
  -7   7   0   15803    1139                                                       14846   -2.70   -0.62  1.0000
   7   7   0   12963     888                                                       12075    2.70    0.61  1.0000
   7   7   0   15442     928                                                       14484    2.70    0.61  1.0000
   7  -7   0   15598    1005                                                       14617   -2.70    0.62  1.0000
  -8   7   0    9254    1038                                                        9285   -0.11    0.18  1.0000
   8  -7   0    8176     854                                                        8207   -0.11   -0.18  1.0000
   9  -7   0    1679     605                                                        1950    0.39   -0.75  1.0000
  -9   7   0     880     785                                                        1089    0.39    0.75  1.0000
   0   8   0    4482     453                                                        2427    4.03    1.24  1.0000
   0  -8   0    5844     470                                                        3543    4.03   -1.24  1.0000
   0   8   0    5985     497                                                        3569    4.03    1.24  1.0000
   1   8   0   11432     653                                                       10042   -2.41    1.38  1.0000
   1  -8   0   11002     690                                                        9414   -2.42   -1.38  1.0000
   1   8   0   10717     719                                                        9369   -2.41    1.38  1.0000
  -1   8   0    8965     643                                                        7727   -2.42    1.38  1.0000
  -1   8   0    9779     657                                                        8489   -2.42    1.38  1.0000
  -1  -8   0   11129     699                                                        9532   -2.41   -1.38  1.0000
   2  -8   0   54891    1592                                                       55330    3.79   -4.43  1.0000
  -2   8   0   53553    1569                                                       54673    3.79    4.43  1.0000
   2   8   0   54808    1483                                                       55938    3.78    4.43  1.0000
  -2   8   0   50450    1622                                                       51517    3.79    4.43  1.0000
  -2  -8   0   54934    1535                                                       55364    3.78   -4.43  1.0000
   2   8   0   52535    1697                                                       53627    3.78    4.43  1.0000
   3  -8   0   17983     858                                                       14732    5.04    3.65  1.0000
  -3   8   0   20021    1110                                                       16894    5.04   -3.65  1.0000
  -3  -8   0   18869     802                                                       15551    5.05    3.65  1.0000
   3   8   0   18155     779                                                       15154    5.05   -3.65  1.0000
   3   8   0   16533     892                                                       13645    5.05   -3.65  1.0000
  -3   8   0   16674     779                                                       13775    5.04   -3.65  1.0000
   4   8   0    5919     565                                                        6334   -4.40   -4.16  1.0000
  -4   8   0    5506     760                                                        5875   -4.39   -4.16  1.0000
   4   8   0    6051     689                                                        6479   -4.40   -4.16  1.0000
   4  -8   0    7041     651                                                        7020   -4.39    4.16  1.0000
  -4  -8   0    4475     515                                                        4301   -4.40    4.16  1.0000
  -5  -8   0    8120     672                                                        8902   -2.48   -0.07  1.0000
  -5   8   0    6945     861                                                        7694   -2.48    0.08  1.0000
   5   8   0    7106     756                                                        7868   -2.48    0.07  1.0000
   5  -8   0    7083     693                                                        7803   -2.48   -0.08  1.0000
  -6  -8   0   13635     931                                                       16763   -1.76    2.24  1.0000
  -6   8   0   15297    1254                                                       18601   -1.75   -2.24  1.0000
   6   8   0   15099    1117                                                       18386   -1.76   -2.24  1.0000
   6  -8   0   16202    1108                                                       19594   -1.75    2.24  1.0000
   7   8   0    3510     594                                                        2420    0.33    2.39  1.0000
   7  -8   0    4144     622                                                        2969    0.32   -2.39  1.0000
  -7   8   0    2555     730                                                        1638    0.32    2.39  1.0000
   8  -8   0     578     546                                                         870   -0.03    1.23  1.0000
  -8   8   0     888     756                                                        1243   -0.03   -1.23  1.0000
  -1  -9   0   21179    1017                                                       24440    0.46    2.82  1.0000
  -1   9   0   21310    1095                                                       24583   -0.45    2.80  1.0000
   1   9   0   20634     988                                                       23873    0.46   -2.82  1.0000
   1   9   0   20176    1098                                                       23380    0.46   -2.82  1.0000
  -1   9   0   19392    1056                                                       22518   -0.45    2.80  1.0000
   1  -9   0   21177    1044                                                       24421   -0.45   -2.80  1.0000
   2   9   0   24065    1068                                                       19954   -4.62   -1.03  1.0000
  -2  -9   0   22470     950                                                       18623   -4.62    1.03  1.0000
   2  -9   0   22795    1003                                                       18928    4.62   -1.04  1.0000
  -2   9   0   22293     949                                                       18340    4.62    1.04  1.0000
  -2   9   0   24114    1107                                                       20006    4.62    1.04  1.0000
   3  -9   0   19921    1009                                                       20058    1.45    0.90  1.0000
  -3  -9   0   22003    1004                                                       22136   -1.44   -0.88  1.0000
   3   9   0   19695    1125                                                       19868   -1.44    0.88  1.0000
  -3   9   0   22826    1235                                                       23030    1.45   -0.90  1.0000
  -3   9   0   20554     992                                                       20745    1.45   -0.90  1.0000
  -4  -9   0    3224     533                                                        3361   -0.89    0.35  1.0000
   4  -9   0    2929     547                                                        3059    0.90   -0.35  1.0000
  -4   9   0    2572     758                                                        2691    0.90    0.35  1.0000
   4   9   0    2993     569                                                        3123   -0.89   -0.35  1.0000
   5   9   0   27191    1293                                                       24839    3.53    1.11  1.0000
   5  -9   0   28824    1238                                                       26354   -3.52    1.13  1.0000
  -5   9   0   29450    1418                                                       26988   -3.52   -1.13  1.0000
   6   9   0    5611     867                                                        8107    1.82    3.14  1.0000
   6  -9   0    5637     806                                                        8131   -1.82    3.12  1.0000
  -6   9   0    4415     955                                                        6639   -1.82   -3.12  1.0000
   7   9   0     563     552                                                         681    1.68   -0.09  1.0000
  -7   9   0      57     710                                                        -780   -1.68    0.07  1.0000
   7  -9   0     330     533                                                         431   -1.68   -0.07  1.0000
   8   9   0      26     551                                                         -32   -0.68   -0.92  1.0000
  -8   9   0    1205     862                                                        1506    0.67    0.95  1.0000
   8  -9   0     819     603                                                         919    0.67   -0.95  1.0000
   0  10   0    3969     463                                                         608   -7.12   -4.83  1.0000
   0 -10   0    4570     436                                                         867   -7.12    4.83  1.0000
   1 -10   0    8798     777                                                       10539    1.85   -0.69  1.0000
  -1  10   0    7896     798                                                        9551    1.85    0.69  1.0000
   1  10   0    7628     802                                                        9253    1.85    0.69  1.0000
  -1 -10   0    8114     730                                                        9787    1.85   -0.69  1.0000
   2  10   0    9524     900                                                       11228    0.75   -1.72  1.0000
  -2  10   0    7629     836                                                        9155    0.74   -1.71  1.0000
  -2  10   0    7301     730                                                        8795    0.74   -1.71  1.0000
  -2 -10   0    6428     709                                                        7842    0.75    1.72  1.0000
   2 -10   0    7469     730                                                        8981    0.74    1.71  1.0000
  -3  10   0    4895     742                                                        3829   -0.99   -3.13  1.0000
  -3  10   0    6260     599                                                        5067   -0.99   -3.13  1.0000
   3 -10   0    6215     622                                                        4874   -0.99    3.13  1.0000
   3  10   0    6090     728                                                        4910   -0.99   -3.14  1.0000
   4  10   0    1923     597                                                        2322    0.26   -2.21  1.0000
   4 -10   0    2105     557                                                        2511    0.26    2.20  1.0000
  -4  10   0    1927     728                                                        2327    0.26   -2.20  1.0000
   5  10   0    2559     670                                                        3446    0.02   -1.95  1.0000
  -5  10   0    3847     909                                                        4922   -0.01   -1.94  1.0000
   5 -10   0    3526     675                                                        4537   -0.01    1.94  1.0000
   6 -10   0    2818     598                                                        2156   -0.69   -1.36  1.0000
  -6  10   0      47     786                                                        -425   -0.69    1.36  1.0000
   6  10   0     976     587                                                         605   -0.68    1.35  1.0000
  -7  10   0    2241     957                                                        2847   -0.77    1.63  1.0000
   7  10   0    2020     735                                                        2593   -0.76    1.63  1.0000
   7 -10   0    1795     648                                                        2338   -0.77   -1.63  1.0000
   1  11   0    8229     859                                                        8928   -1.03    1.63  1.0000
  -1  11   0    9336     858                                                       10081    1.03   -1.63  1.0000
   1 -11   0    7869     791                                                        8626    1.03    1.63  1.0000
   2 -11   0     105     469                                                        -227    1.76    1.45  1.0000
  -2  11   0     836     497                                                         878    1.76   -1.45  1.0000
   2  11   0     555     487                                                         571   -1.76    1.47  1.0000
   3 -11   0   13413     979                                                       13080    0.37   -0.42  1.0000
   3  11   0   12545    1008                                                       12160   -0.37   -0.42  1.0000
   4  11   0    1034     605                                                         949   -1.43   -0.71  1.0000
   4 -11   0     717     516                                                         628    1.43   -0.71  1.0000
   5  11   0   11524    1014                                                        9789    1.81    0.51  1.0000
   5 -11   0   12310     915                                                       10508   -1.81    0.52  1.0000
   6 -11   0     923     596                                                         984   -1.97    1.24  1.0000
   6  11   0     110     486                                                        -480    1.97    1.26  1.0000
  -6  11   0    1598     877                                                        1825   -1.97   -1.24  1.0000
   0  12   0   11456    1146                                                       15807    0.07    4.50  1.0000
  -1  12   0    5107     742                                                        4940   -1.32   -1.04  1.0000
   1  12   0    4611     767                                                        4450   -1.33   -1.04  1.0000
   2  12   0    3297     735                                                        3234   -1.57    0.38  1.0000
   2 -12   0    3219     624                                                        3176   -1.58   -0.37  1.0000
  -2  12   0    2730     628                                                        2666   -1.58    0.37  1.0000
   3 -12   0    4093     671                                                        3196    2.45   -0.64  1.0000
   3  12   0    2741     703                                                        2017    2.45    0.64  1.0000
   4  12   0    5064     892                                                        6126    1.33   -1.78  1.0000
   4 -12   0    4369     742                                                        5350    1.33    1.78  1.0000
   5  12   0    1354     720                                                        1251   -2.67    0.92  1.0000
   5 -12   0     713     575                                                         618   -2.68   -0.92  1.0000
   1  13   0    5865     972                                                        7384   -1.93    1.01  1.0000
  -1  13   0    5271     903                                                        6712    1.93   -1.02  1.0000
   2  13   0    1506     748                                                        2113    0.99   -1.26  1.0000
  -2  13   0    1555     680                                                        2175   -0.98    1.27  1.0000
   3  13   0    7534     982                                                        7960   -0.07   -0.74  1.0000
   1   0   1   16137     324                                                       12458    0.01   -3.44  1.0000
   1   0  -1   16205     317                                                       12511    0.03   -3.45  1.0000
   2   0   1   23367     404                                                       11818   -0.01    9.84  1.0000
   2   0   1   23665     418                                                       12030   -0.01    9.84  1.0000
  -2   0   1   23532     413                                                       11930   -0.01   -9.85  1.0000
   2   0  -1   23027     399                                                       11571   -0.01    9.85  1.0000
  -3   0  -1  179185    3190                                                      168375    0.00   -2.89  1.0000
   3   0  -1  176274    3088                                                      165575    0.00    2.89  1.0000
  -3   0   1  183045    3199                                                      172139    0.00   -2.89  1.0000
   3   0   1  175795    3075                                                      165091    0.00    2.89  1.0000
   4   0  -1   12459     544                                                       10642    0.00   -1.89  1.0000
  -4   0  -1   12117     539                                                       10318   -0.01    1.89  1.0000
  -4   0  -1   12539     344                                                       10708   -0.01    1.89  1.0000
   4   0  -1   11945     322                                                       10168    0.00   -1.89  1.0000
  -4   0   1   11552     544                                                        9805    0.00    1.89  1.0000
   4   0   1   11639     524                                                        9877   -0.01   -1.89  1.0000
  -5   0   1   39531    1299                                                       42432    0.01   -1.60  1.0000
   5   0   1   41465    1225                                                       44455    0.00    1.61  1.0000
  -5   0  -1   45236     956                                                       48357    0.00   -1.61  1.0000
  -5   0  -1   39650    1285                                                       42575    0.00   -1.61  1.0000
   5   0  -1   39523    1217                                                       42423    0.01    1.60  1.0000
  -6   0  -1    8266     629                                                        7858   -0.01   -0.51  1.0000
   6   0   1    8814     627                                                        8393   -0.01    0.51  1.0000
  -6   0   1    8370     608                                                        7949    0.00   -0.52  1.0000
   6   0  -1    8615     599                                                        8188    0.00    0.52  1.0000
   7   0  -1    1283     421                                                        1940    0.02    1.87  1.0000
  -7   0  -1    1675     447                                                        2418    0.01   -1.88  1.0000
  -7   0   1    1581     454                                                        2298    0.02   -1.87  1.0000
   7   0   1    1411     405                                                        2102    0.01    1.88  1.0000
   8   0   1   32383    1241                                                       29800   -0.01   -1.64  1.0000
   8   0  -1   27995    1209                                                       25615   -0.01   -1.62  1.0000
  -8   0  -1   29551    1304                                                       27086   -0.01    1.64  1.0000
  -8   0   1   26325    1237                                                       24019   -0.01    1.62  1.0000
  -9   0  -1      19     463                                                        -317    0.00    0.96  1.0000
   9   0   1     587     513                                                         813    0.00   -0.96  1.0000
   9   0  -1     322     469                                                         495    0.01   -0.97  1.0000
  -9   0   1     793     563                                                        1055    0.01    0.97  1.0000
  10   0   1     352     508                                                          89   -0.01   -2.08  1.0000
  10   0  -1    1451     603                                                         832    0.00   -2.06  1.0000
 -10   0  -1    2022     630                                                        1270   -0.01    2.08  1.0000
 -10   0   1      85     522                                                        -435    0.00    2.06  1.0000
  11   0   1    2531     716                                                        1874    0.00    1.59  1.0000
 -11   0   1     476     653                                                         220    0.01   -1.58  1.0000
  11   0  -1      50     639                                                        -218    0.01    1.58  1.0000
 -11   0  -1     567     601                                                         282    0.00   -1.59  1.0000
  -1   1   1  266925    3643                                                      205910   -8.28  -11.33  1.0000
   1   1   1  270521    3616                                                      209087   -8.28  -11.33  1.0000
  -1   1  -1  271477    3627                                                      209891   -8.29  -11.33  1.0000
   1  -1   1  272650    3560                                                      210890   -8.29   11.33  1.0000
   1  -1  -1  261452    3535                                                      201076   -8.28   11.33  1.0000
   1   1  -1  258301    3533                                                      198331   -8.29  -11.33  1.0000
   1   1   1  268379    3552                                                      207204   -8.28  -11.33  1.0000
   1   1  -1  268174    3547                                                      206994   -8.29  -11.33  1.0000
  -2   1   1   75474    1446                                                       69684    6.05    7.08  1.0000
   2  -1  -1   75162    1379                                                       69880    6.05   -7.08  1.0000
   2   1   1   73906    1393                                                       68150    6.07    7.09  1.0000
   2   1  -1   75135    1367                                                       69367    6.06    7.11  1.0000
   2  -1   1   74408    1380                                                       69158    6.06   -7.10  1.0000
  -2   1  -1   72372    1415                                                       66682    6.06    7.10  1.0000
   2   1   1   72757    1328                                                       67034    6.07    7.09  1.0000
   2   1   1   75340    1325                                                       69543    6.07    7.09  1.0000
   2   1  -1   73832    1375                                                       68101    6.06    7.11  1.0000
   2   1  -1   73868    1310                                                       68136    6.06    7.11  1.0000
   3  -1   1   21101     709                                                       22715    0.72   -1.68  1.0000
   3  -1  -1   21065     707                                                       22687    0.72   -1.69  1.0000
  -3   1   1   19124     721                                                       20825    0.72    1.69  1.0000
  -3   1  -1   19985     721                                                       21713    0.72    1.68  1.0000
   3   1   1   20082     586                                                       21833    0.73    1.69  1.0000
   3   1  -1   19278     574                                                       20985    0.72    1.69  1.0000
   3   1  -1   20792     689                                                       22564    0.72    1.69  1.0000
   3   1   1   21167     718                                                       22965    0.73    1.69  1.0000
   3   1   1   19059     634                                                       20765    0.73    1.69  1.0000
   4   1  -1   10494     398                                                       10407    0.62   -0.89  1.0000
   4   1   1   10243     516                                                       10156    0.63   -0.90  1.0000
  -4  -1  -1   10923     410                                                       10766    0.63    0.90  1.0000
  -4  -1   1   10472     542                                                       10320    0.62    0.89  1.0000
   4  -1  -1   10701     558                                                       10536    0.62    0.91  1.0000
   4  -1   1   11559     565                                                       11399    0.63    0.90  1.0000
  -4   1  -1    9948     537                                                        9862    0.63   -0.90  1.0000
   4   1  -1    9832     501                                                        9747    0.62   -0.89  1.0000
  -4   1   1   11103     578                                                       11004    0.62   -0.91  1.0000
   4   1   1   10563     565                                                       10475    0.63   -0.90  1.0000
  -5  -1  -1   28587     798                                                       30653   -0.99    1.15  1.0000
   5   1  -1   29601    1011                                                       31807   -0.99   -1.16  1.0000
  -5   1  -1   26411    1048                                                       28486   -0.99   -1.14  1.0000
   5   1  -1   28611     788                                                       30780   -0.99   -1.16  1.0000
  -5  -1   1   29436    1050                                                       31549   -0.99    1.16  1.0000
  -5   1   1   28478    1071                                                       30625   -0.99   -1.13  1.0000
   5  -1   1   29401    1018                                                       31503   -0.99    1.14  1.0000
  -5  -1  -1   26360    1010                                                       28345   -0.99    1.15  1.0000
   5  -1  -1   27773     990                                                       29812   -0.99    1.13  1.0000
   5   1   1   29843     991                                                       32040   -0.99   -1.15  1.0000
   6   1   1   11709     748                                                       13941   -2.55   -0.40  1.0000
  -6   1  -1   12415     815                                                       14713   -2.55   -0.39  1.0000
   6   1  -1   11638     729                                                       13870   -2.55   -0.39  1.0000
  -6   1   1   11204     799                                                       13394   -2.56   -0.40  1.0000
  -6  -1  -1   12903     550                                                       15052   -2.55    0.40  1.0000
   6  -1  -1   12124     744                                                       14213   -2.56    0.40  1.0000
  -6  -1  -1   12874     818                                                       15021   -2.55    0.40  1.0000
   6  -1   1   11209     755                                                       13217   -2.55    0.39  1.0000
  -6  -1   1   10915     760                                                       12902   -2.55    0.39  1.0000
   7   1  -1   22290    1028                                                       23279   -0.13    0.73  1.0000
   7  -1  -1   19206     990                                                       20133   -0.12   -0.74  1.0000
   7  -1   1   21609    1021                                                       22586   -0.13   -0.73  1.0000
  -7   1  -1   21058    1046                                                       22023   -0.13    0.73  1.0000
  -7  -1   1   22053    1064                                                       23037   -0.13   -0.73  1.0000
   7   1   1   20237     989                                                       21193   -0.12    0.74  1.0000
  -7   1   1   22044    1090                                                       23036   -0.12    0.74  1.0000
  -7  -1  -1   22315    1071                                                       23319   -0.12   -0.74  1.0000
  -8   1   1   19645    1145                                                       19894    0.44    1.03  1.0000
   8  -1   1   19242    1006                                                       19399    0.45   -1.06  1.0000
  -8  -1  -1   19517    1079                                                       19674    0.45   -1.05  1.0000
  -8  -1   1   18149    1043                                                       18294    0.45   -1.05  1.0000
   8   1   1   17643    1015                                                       17889    0.45    1.05  1.0000
  -8   1  -1   19547    1096                                                       19809    0.45    1.06  1.0000
   8   1  -1   19044    1060                                                       19296    0.45    1.05  1.0000
   8  -1  -1   18211    1043                                                       18352    0.44   -1.03  1.0000
  -9  -1  -1    3178     704                                                        4382    3.66    0.33  1.0000
  -9   1   1    5042     816                                                        6589    3.66   -0.34  1.0000
  -9  -1   1    3501     725                                                        4758    3.66    0.35  1.0000
   9  -1   1    3625     703                                                        4911    3.66    0.35  1.0000
   9   1  -1    4079     695                                                        5455    3.66   -0.35  1.0000
  -9   1  -1    2880     714                                                        4028    3.66   -0.35  1.0000
   9  -1  -1    3373     707                                                        4612    3.66    0.34  1.0000
   9   1   1    4299     725                                                        5726    3.66   -0.33  1.0000
 -10  -1   1    2871     721                                                        2621   -1.17   -0.59  1.0000
  10  -1  -1    3972     688                                                        3678   -1.16   -0.57  1.0000
  10   1  -1    3416     697                                                        3163   -1.17    0.59  1.0000
  10  -1   1    3983     721                                                        3693   -1.16   -0.58  1.0000
 -10   1   1    3029     722                                                        2786   -1.16    0.57  1.0000
 -10  -1  -1    4531     738                                                        4224   -1.16   -0.58  1.0000
 -10   1  -1    3081     733                                                        2840   -1.16    0.58  1.0000
  10   1   1    4819     736                                                        4524   -1.16    0.58  1.0000
  11  -1  -1    4211     843                                                        3754   -0.85   -0.29  1.0000
 -11   1  -1    2731     816                                                        2346   -0.84    0.28  1.0000
 -11  -1   1    2899     774                                                        2527   -0.85   -0.27  1.0000
 -11   1   1    1658     750                                                        1357   -0.85    0.29  1.0000
  11  -1   1    2630     758                                                        2276   -0.84   -0.28  1.0000
  11   1   1     451     664                                                         302   -0.84    0.29  1.0000
 -11  -1  -1    2339     760                                                        2003   -0.84   -0.29  1.0000
  11   1  -1    3326     719                                                        2899   -0.85    0.27  1.0000
  -1   2   1  130362    2478                                                      139477    2.45    1.48  1.0000
  -1   2  -1  132467    2571                                                      141657    2.45    1.48  1.0000
   1  -2  -1  129006    2509                                                      138112    2.45   -1.48  1.0000
   1   2   1  133388    2562                                                      142571   -2.44   -1.49  1.0000
   1   2  -1  131428    2556                                                      140530   -2.43   -1.50  1.0000
   1   2   1  131016    2553                                                      140119   -2.44   -1.49  1.0000
   1  -2   1  133669    2552                                                      142938    2.45   -1.48  1.0000
  -1   2  -1  132519    2492                                                      141710    2.45    1.48  1.0000
  -1   2   1  129066    2614                                                      138136    2.45    1.48  1.0000
   1   2  -1  131062    2508                                                      140152   -2.43   -1.50  1.0000
  -1  -2   1  132334    2527                                                      141507   -2.43    1.50  1.0000
  -2   2  -1   12589     525                                                       14137   -2.12    3.41  1.0000
   2   2  -1   12432     483                                                       13965    2.12   -3.40  1.0000
   2   2   1   11328     483                                                       12792    2.11   -3.41  1.0000
   2   2  -1   13138     464                                                       14721    2.12   -3.40  1.0000
   2  -2   1   11915     502                                                       13530   -2.12   -3.41  1.0000
   2   2  -1   12815     470                                                       14375    2.12   -3.40  1.0000
  -2   2   1   12676     535                                                       14214   -2.14    3.40  1.0000
  -2   2  -1   12561     371                                                       14107   -2.12    3.41  1.0000
   2   2   1   12240     493                                                       13772    2.11   -3.41  1.0000
   2   2   1   12453     454                                                       14000    2.11   -3.41  1.0000
   2  -2  -1   11785     509                                                       13375   -2.14   -3.40  1.0000
   3  -2   1   31651     946                                                       34606   -0.25   -2.41  1.0000
   3  -2  -1   31935     937                                                       34915   -0.26   -2.42  1.0000
   3   2  -1   33342     894                                                       36457    0.27   -2.43  1.0000
   3   2  -1   31895     925                                                       34942    0.27   -2.43  1.0000
   3   2   1   32710     884                                                       35797    0.25   -2.42  1.0000
   3   2  -1   33970     930                                                       37114    0.27   -2.43  1.0000
   3   2   1   31720     938                                                       34760    0.25   -2.42  1.0000
   3   2   1   32665     895                                                       35750    0.25   -2.42  1.0000
  -3   2  -1   31814     992                                                       34851   -0.25    2.41  1.0000
  -3   2   1   33224    1018                                                       36340   -0.26    2.42  1.0000
  -4   2   1  103058    2169                                                       97045    2.39   -0.20  1.0000
   4  -2  -1  100718    2056                                                       94800    2.39    0.20  1.0000
   4   2   1  100854    1976                                                       94879   -2.41    0.18  1.0000
   4  -2   1   94117    2020                                                       88396    2.40    0.19  1.0000
   4   2  -1  103759    2054                                                       97701   -2.40    0.20  1.0000
   4   2  -1  100326    2004                                                       94371   -2.40    0.20  1.0000
   4   2  -1  101372    1924                                                       95385   -2.40    0.20  1.0000
   4   2   1  103512    1943                                                       97458   -2.41    0.18  1.0000
  -4   2  -1  100115    2143                                                       94187    2.40   -0.19  1.0000
   4   2   1  104145    2074                                                       98072   -2.41    0.18  1.0000
   5   2  -1   33204     995                                                       37210    1.65    1.82  1.0000
   5   2   1   33098    1099                                                       37103    1.66    1.82  1.0000
   5  -2   1   33535    1170                                                       37431   -1.65    1.83  1.0000
   5   2   1   33151    1166                                                       37159    1.66    1.82  1.0000
  -5   2   1   35680    1269                                                       39812   -1.64   -1.82  1.0000
  -5   2  -1   31646    1208                                                       35560   -1.65   -1.83  1.0000
  -5  -2   1   33262    1169                                                       37145    1.65   -1.82  1.0000
   5  -2  -1   34181    1165                                                       38098   -1.64    1.82  1.0000
   5   2   1   34281    1012                                                       38355    1.66    1.82  1.0000
   5   2  -1   32627    1110                                                       36599    1.65    1.82  1.0000
   6   2   1   51288    1441                                                       51155   -0.78   -3.55  1.0000
  -6  -2   1   52997    1537                                                       52349   -0.77    3.53  1.0000
   6  -2   1   52404    1505                                                       51764    0.78   -3.54  1.0000
   6   2  -1   51455    1267                                                       51311   -0.77   -3.53  1.0000
  -6   2   1   52462    1621                                                       52314    0.77    3.54  1.0000
   6  -2  -1   49758    1495                                                       49116    0.77   -3.54  1.0000
  -6  -2  -1   54179    1281                                                       53536   -0.78    3.55  1.0000
  -6   2  -1   48904    1557                                                       48765    0.78    3.54  1.0000
   6   2  -1   49912    1432                                                       49766   -0.77   -3.53  1.0000
  -7   2  -1    4534     587                                                        4189    1.14   -0.15  1.0000
  -7  -2  -1    3901     533                                                        3569   -1.14   -0.13  1.0000
  -7  -2   1    4841     551                                                        4474   -1.14   -0.13  1.0000
   7  -2  -1    4940     572                                                        4568    1.15    0.13  1.0000
   7   2   1    4404     526                                                        4055   -1.14    0.13  1.0000
   7  -2   1    4293     527                                                        3954    1.14    0.15  1.0000
   7   2  -1    3943     529                                                        3614   -1.14    0.13  1.0000
  -7   2   1    4627     598                                                        4269    1.15   -0.13  1.0000
   8  -2  -1   11404     804                                                       10619    1.23   -2.36  1.0000
  -8  -2   1   10767     824                                                        9992   -1.24    2.36  1.0000
   8   2   1   12561     847                                                       11638   -1.24   -2.38  1.0000
  -8   2   1   12247     938                                                       11342    1.23    2.36  1.0000
  -8   2  -1   13151     942                                                       12210    1.24    2.38  1.0000
   8  -2   1   13152     905                                                       12311    1.24   -2.38  1.0000
   8   2  -1   12389     870                                                       11470   -1.24   -2.36  1.0000
  -8  -2  -1   11868     857                                                       11062   -1.24    2.38  1.0000
  -9   2   1   11875    1020                                                       12207    1.00    0.66  1.0000
   9   2   1   13118     968                                                       13471   -0.99   -0.65  1.0000
   9  -2   1   13861    1021                                                       14202    0.99   -0.63  1.0000
   9  -2  -1   12784     983                                                       13097    1.00   -0.66  1.0000
   9   2  -1   14084     994                                                       14443   -0.98   -0.65  1.0000
  -9  -2   1   13356    1027                                                       13673   -0.98    0.65  1.0000
  -9  -2  -1   12319     960                                                       12629   -0.99    0.65  1.0000
  -9   2  -1   10458     997                                                       10779    0.99    0.63  1.0000
  10   2  -1    3939     762                                                        4433    0.23   -0.82  1.0000
  10  -2  -1    3786     764                                                        4276   -0.23   -0.83  1.0000
 -10   2  -1    2447     752                                                        2847   -0.23    0.84  1.0000
 -10  -2  -1    2813     745                                                        3241    0.22    0.84  1.0000
 -10   2   1    4292     851                                                        4812   -0.23    0.83  1.0000
  10  -2   1    4077     764                                                        4589   -0.23   -0.84  1.0000
  10   2   1    5129     798                                                        5700    0.22   -0.84  1.0000
 -10  -2   1    3748     778                                                        4231    0.23    0.82  1.0000
   0  -3   1   28322    1066                                                       48187  -10.67   -4.19  1.0000
   0   3   1   28142    1083                                                       48033  -10.68    4.18  1.0000
   0   3  -1   28387    1087                                                       48351  -10.67    4.19  1.0000
   0   3  -1   28350    1033                                                       48302  -10.67    4.19  1.0000
   0  -3  -1   29070    1021                                                       49166  -10.68   -4.18  1.0000
   0   3   1   27623    1087                                                       47354  -10.68    4.18  1.0000
  -1   3  -1    2549     247                                                        2182    5.79    2.46  1.0000
   1   3   1    1750     207                                                        1283    5.80    2.47  1.0000
   1   3  -1    2661     200                                                        2305    5.79    2.46  1.0000
  -1   3   1    2388     203                                                        2004    5.81    2.47  1.0000
  -1   3   1    2414     283                                                        2032    5.81    2.47  1.0000
  -1  -3  -1    3128     204                                                        2371    5.80   -2.47  1.0000
   1   3   1    2193     226                                                        1786    5.80    2.47  1.0000
   1   3  -1    2402     236                                                        2017    5.79    2.46  1.0000
  -1  -3   1    2905     222                                                        2141    5.79   -2.46  1.0000
  -1   3  -1    2515     206                                                        2144    5.79    2.46  1.0000
   1  -3  -1    2721     229                                                        1959    5.81   -2.47  1.0000
   1  -3   1    2593     252                                                        1828    5.79   -2.46  1.0000
   2  -3  -1  166311    3299                                                      174989    6.22   -1.70  1.0000
  -2   3  -1  171139    3398                                                      180010    6.22    1.71  1.0000
  -2   3   1  172298    3443                                                      181178    6.22    1.70  1.0000
   2   3  -1  172708    3283                                                      181613    6.22    1.70  1.0000
   2   3   1  171448    3338                                                      180341    6.23    1.71  1.0000
   2   3   1  172123    3353                                                      181035    6.23    1.71  1.0000
   2  -3   1  169062    3334                                                      177839    6.22   -1.71  1.0000
  -2   3  -1  174150    3200                                                      183104    6.22    1.71  1.0000
  -2   3   1  171582    3186                                                      180442    6.22    1.70  1.0000
   2   3   1  173662    3237                                                      182617    6.23    1.71  1.0000
   2   3  -1  173234    3351                                                      182154    6.22    1.70  1.0000
   3   3  -1   60980    1164                                                       48749    5.78   -2.09  1.0000
  -3   3   1   61908     986                                                       49565    5.79   -2.06  1.0000
   3   3  -1   62728    1218                                                       50314    5.78   -2.09  1.0000
   3   3   1   62847    1157                                                       50407    5.79   -2.07  1.0000
   3   3   1   63143    1214                                                       50673    5.79   -2.07  1.0000
   3   3  -1   62251    1194                                                       49887    5.78   -2.09  1.0000
   3  -3   1   61002    1234                                                       48532    5.78    2.08  1.0000
  -3   3  -1   63210    1289                                                       50765    5.78   -2.08  1.0000
  -3   3  -1   62905    1007                                                       50491    5.78   -2.08  1.0000
  -3   3   1   62721    1320                                                       50293    5.79   -2.06  1.0000
   3   3   1   62023    1214                                                       49669    5.79   -2.07  1.0000
   3  -3  -1   63081    1234                                                       50359    5.79    2.06  1.0000
   4   3   1   63103    1557                                                       68411    0.84   -2.19  1.0000
   4   3  -1   61284    1552                                                       66517    0.85   -2.18  1.0000
  -4   3  -1   57848    1644                                                       62928    0.85   -2.18  1.0000
   4  -3  -1   62314    1617                                                       67598    0.85    2.18  1.0000
   4   3   1   59832    1576                                                       65003    0.84   -2.19  1.0000
   4   3  -1   61063    1548                                                       66287    0.85   -2.18  1.0000
   4   3  -1   60350    1524                                                       65544    0.85   -2.18  1.0000
   4   3   1   61316    1513                                                       66550    0.84   -2.19  1.0000
  -4   3   1   60884    1697                                                       66107    0.85   -2.18  1.0000
   4  -3   1   61533    1620                                                       66770    0.85    2.18  1.0000
   5   3  -1   39677    1205                                                       40007   -0.19    0.38  1.0000
   5   3   1   40477    1156                                                       40796   -0.19    0.39  1.0000
   5  -3  -1   41660    1260                                                       42053   -0.18   -0.40  1.0000
   5   3  -1   43292    1171                                                       43637   -0.19    0.38  1.0000
   5   3   1   42849    1264                                                       43177   -0.19    0.39  1.0000
   5   3   1   41772    1195                                                       42096   -0.19    0.39  1.0000
   5  -3   1   40440    1270                                                       40844   -0.19   -0.39  1.0000
   5   3  -1   40919    1222                                                       41254   -0.19    0.38  1.0000
  -5   3  -1   41013    1342                                                       41348   -0.19    0.39  1.0000
  -5   3   1   43441    1373                                                       43766   -0.18    0.40  1.0000
  -6  -3   1   27203    1076                                                       27861   -0.27   -0.57  1.0000
   6   3   1   27846    1096                                                       28454   -0.27    0.58  1.0000
   6  -3   1   27466    1115                                                       28128   -0.26   -0.58  1.0000
   6  -3  -1   24279    1035                                                       24899   -0.27   -0.56  1.0000
  -6   3   1   26245    1165                                                       26822   -0.27    0.56  1.0000
   6   3   1   27669    1028                                                       28275   -0.27    0.58  1.0000
   6   3  -1   25987     939                                                       26563   -0.27    0.57  1.0000
  -6   3  -1   25122    1141                                                       25687   -0.26    0.58  1.0000
   6   3  -1   27512    1052                                                       28104   -0.27    0.57  1.0000
   7  -3  -1     487     445                                                        1099    2.65    0.67  1.0000
  -7  -3   1     724     432                                                        1444    2.64    0.69  1.0000
   7  -3   1     307     399                                                         808    2.64    0.68  1.0000
  -7   3  -1     907     491                                                        1321    2.64   -0.68  1.0000
  -7   3   1     531     468                                                         832    2.65   -0.67  1.0000
   7   3   1     612     396                                                         939    2.64   -0.67  1.0000
  -7  -3  -1     878     452                                                        1661    2.64    0.67  1.0000
   7   3  -1     971     442                                                        1401    2.64   -0.69  1.0000
   8  -3   1    1440     594                                                        2986    2.88   -2.45  1.0000
   8   3   1     966     545                                                        2302    2.89    2.44  1.0000
  -8   3   1    1520     643                                                        3121    2.89    2.43  1.0000
  -8  -3  -1    1617     578                                                        3238    2.89   -2.44  1.0000
   8  -3  -1    1073     583                                                        2440    2.89   -2.43  1.0000
  -8   3  -1     665     607                                                        1823    2.88    2.45  1.0000
   8   3  -1    2151     612                                                        4007    2.90    2.43  1.0000
  -8  -3   1    1522     549                                                        3102    2.90   -2.43  1.0000
   9   3   1   10713     869                                                       10069    1.70   -1.98  1.0000
  -9  -3   1   12462     964                                                       11959    1.71    1.99  1.0000
  -9   3  -1   10690     931                                                       10038    1.70   -1.99  1.0000
   9  -3  -1   11758     944                                                       11280    1.71    1.98  1.0000
   9   3  -1   11661     895                                                       10986    1.71   -1.99  1.0000
   9  -3   1   11727     940                                                       11235    1.70    1.99  1.0000
  -9   3   1   10516     962                                                        9882    1.71   -1.98  1.0000
  -9  -3  -1   11626     959                                                       11144    1.70    1.98  1.0000
  10   3   1    9157     924                                                        9756    1.26   -1.15  1.0000
 -10  -3   1    8161     952                                                        8926    1.27    1.14  1.0000
 -10  -3  -1    6618     905                                                        7301    1.26    1.15  1.0000
  10  -3  -1    6391     840                                                        7062    1.27    1.17  1.0000
  10   3  -1    7773     894                                                        8327    1.27   -1.14  1.0000
 -10   3  -1    7489     947                                                        8030    1.26   -1.14  1.0000
 -10   3   1    8884    1022                                                        9472    1.27   -1.17  1.0000
  10  -3   1    7679     892                                                        8418    1.26    1.14  1.0000
  -1   4  -1   26181     889                                                       33089   -5.61    1.04  1.0000
   1   4   1   26513     945                                                       33469    5.62   -1.06  1.0000
   1   4  -1   27078     831                                                       34098    5.61   -1.05  1.0000
   1  -4   1   26294     933                                                       33908   -5.61   -1.04  1.0000
  -1   4   1   27888     899                                                       35002   -5.61    1.05  1.0000
  -1  -4   1   24446     881                                                       31797    5.61    1.05  1.0000
  -1   4   1   25026     975                                                       31773   -5.61    1.05  1.0000
   1   4  -1   26659     958                                                       33625    5.61   -1.05  1.0000
   1   4   1   26919     891                                                       33927    5.62   -1.06  1.0000
  -1   4  -1   28304     945                                                       35481   -5.61    1.04  1.0000
   1  -4  -1   27160     898                                                       34885   -5.61   -1.05  1.0000
  -1  -4  -1   28153     867                                                       36030    5.62    1.06  1.0000
   2   4   1  108888    2417                                                      116574   -1.94   -2.15  1.0000
   2   4  -1  110300    2282                                                      118008   -1.93   -2.14  1.0000
  -2   4   1  109542    2477                                                      117190    1.90    2.13  1.0000
  -2  -4  -1  113064    2283                                                      120959   -1.94    2.15  1.0000
   2  -4  -1  105386    2329                                                      112951    1.90   -2.13  1.0000
   2   4  -1  108996    2412                                                      116659   -1.93   -2.14  1.0000
  -2  -4   1  114693    2350                                                      122617   -1.93    2.14  1.0000
  -2   4  -1  114287    2278                                                      122165    1.93    2.15  1.0000
   2  -4   1  110594    2383                                                      118410    1.93   -2.15  1.0000
   2   4   1  109277    2336                                                      116977   -1.94   -2.15  1.0000
  -2   4   1  111754    2263                                                      119478    1.90    2.13  1.0000
  -2   4  -1  110603    2424                                                      118355    1.93    2.15  1.0000
   3   4   1   70310    1590                                                       73863   -2.13   -3.22  1.0000
   3  -4   1   66916    1689                                                       70282    2.14   -3.22  1.0000
  -3   4   1   71545    1478                                                       75124    2.14    3.23  1.0000
  -3   4   1   69683    1787                                                       73213    2.14    3.23  1.0000
   3   4   1   68848    1639                                                       72362   -2.13   -3.22  1.0000
  -3   4  -1   72247    1761                                                       75833    2.14    3.22  1.0000
  -3   4  -1   69804    1480                                                       73325    2.14    3.22  1.0000
   3  -4  -1   69852    1686                                                       73308    2.14   -3.23  1.0000
   3   4  -1   69315    1596                                                       72850   -2.14   -3.23  1.0000
   3   4  -1   69285    1708                                                       72819   -2.14   -3.23  1.0000
   3   4  -1   67060    1619                                                       70534   -2.14   -3.23  1.0000
   3   4   1   67866    1706                                                       71353   -2.13   -3.22  1.0000
  -4   4   1   29465    1070                                                       28955   -0.25   -1.17  1.0000
   4   4   1   29267     968                                                       28751    0.25    1.17  1.0000
   4  -4   1   28547     976                                                       27956   -0.24    1.16  1.0000
   4   4   1   29834     948                                                       29314    0.25    1.17  1.0000
   4   4   1   28265     882                                                       27758    0.25    1.17  1.0000
  -4   4  -1   29653     705                                                       29133   -0.24   -1.16  1.0000
  -4   4  -1   30379    1052                                                       29852   -0.24   -1.16  1.0000
   4   4  -1   28537     928                                                       28030    0.25    1.18  1.0000
   4   4  -1   28973     955                                                       28462    0.25    1.18  1.0000
   4  -4  -1   28032     958                                                       27452   -0.25    1.17  1.0000
   4   4  -1   28833     905                                                       28323    0.25    1.18  1.0000
   5  -4  -1   17219     824                                                       16012   -2.87   -0.76  1.0000
   5   4  -1   17804     772                                                       16551    2.89   -0.77  1.0000
   5   4   1   16620     746                                                       15402    2.89   -0.77  1.0000
   5   4  -1   16968     735                                                       15742    2.89   -0.77  1.0000
   5   4   1   16966     784                                                       15737    2.89   -0.77  1.0000
  -5   4   1   19794     930                                                       18482   -2.87    0.76  1.0000
   5   4   1   17771     757                                                       16516    2.89   -0.77  1.0000
   5  -4   1   17178     790                                                       15962   -2.88   -0.75  1.0000
  -5   4  -1   17073     857                                                       15835   -2.88    0.75  1.0000
   5   4  -1   16554     773                                                       15341    2.89   -0.77  1.0000
   6   4  -1   41847    1274                                                       41876   -0.34    0.02  1.0000
   6  -4   1   42169    1400                                                       42182    0.35    0.01  1.0000
   6   4   1   42727    1286                                                       42750   -0.35    0.02  1.0000
  -6   4   1   37739    1420                                                       37766    0.34   -0.02  1.0000
   6   4   1   39936    1316                                                       39958   -0.35    0.02  1.0000
   6   4  -1   40446    1301                                                       40474   -0.34    0.02  1.0000
   6   4  -1   40741    1297                                                       40769   -0.34    0.02  1.0000
   6  -4  -1   42666    1394                                                       42695    0.34    0.02  1.0000
  -6   4  -1   40610    1452                                                       40623    0.35   -0.01  1.0000
   6   4   1   40956    1269                                                       40979   -0.35    0.02  1.0000
   7   4   1    7296     641                                                        6084    1.28   -1.04  1.0000
   7   4  -1    5950     587                                                        4862    1.28   -1.04  1.0000
   7  -4   1    6116     594                                                        5022   -1.28   -1.03  1.0000
  -7   4   1    5768     681                                                        4699   -1.27    1.05  1.0000
  -7  -4   1    6318     573                                                        5197    1.28    1.04  1.0000
   7  -4  -1    4715     561                                                        3754   -1.27   -1.05  1.0000
   7   4   1    4677     515                                                        3718    1.28   -1.04  1.0000
  -7  -4  -1    5934     495                                                        4848    1.28    1.04  1.0000
  -7   4  -1    6478     677                                                        5349   -1.28    1.03  1.0000
   8  -4  -1   12132     922                                                       12477   -0.18    0.30  1.0000
  -8   4  -1   10377     904                                                       10675   -0.17   -0.28  1.0000
   8   4  -1   12145     893                                                       12483    0.17    0.30  1.0000
   8  -4   1   11086     866                                                       11395   -0.17    0.28  1.0000
   8   4   1   11092     849                                                       11410    0.17    0.30  1.0000
  -8  -4  -1   10609     853                                                       10921    0.17   -0.30  1.0000
  -8  -4   1   10151     819                                                       10461    0.17   -0.30  1.0000
  -8   4   1   10645     964                                                       10968   -0.18   -0.30  1.0000
  -9  -4   1    6093     748                                                        5161   -1.53   -0.23  1.0000
   9  -4  -1    5377     737                                                        4499    1.54    0.22  1.0000
   9   4   1    6225     700                                                        5315   -1.53    0.23  1.0000
  -9   4   1    5843     819                                                        4958    1.54   -0.22  1.0000
   9   4  -1    4182     660                                                        3441   -1.53    0.23  1.0000
  -9  -4  -1    5964     726                                                        5042   -1.53   -0.23  1.0000
  -9   4  -1    5115     770                                                        4289    1.54   -0.23  1.0000
   9  -4   1    5110     691                                                        4255    1.54    0.23  1.0000
  10  -4  -1    5033     846                                                        4890   -0.28   -0.59  1.0000
  10   4  -1    5224     802                                                        5120    0.27   -0.59  1.0000
 -10   4  -1    3772     797                                                        3684   -0.27    0.61  1.0000
 -10   4   1    3678     864                                                        3585   -0.28    0.59  1.0000
 -10  -4  -1    4305     777                                                        4177    0.27    0.61  1.0000
 -10  -4   1    4017     745                                                        3893    0.27    0.59  1.0000
  10   4   1    5313     786                                                        5209    0.27   -0.61  1.0000
  10  -4   1    4877     827                                                        4742   -0.27   -0.61  1.0000
   0   5  -1   25605     672                                                       19638   -5.67   -3.31  1.0000
   0  -5  -1   23278     658                                                       17520   -5.69    3.31  1.0000
   0   5  -1   26084     732                                                       20062   -5.67   -3.31  1.0000
   0   5   1   25821     729                                                       19827   -5.69   -3.31  1.0000
   0   5   1   24937     707                                                       19045   -5.69   -3.31  1.0000
   0  -5   1   24715     694                                                       18786   -5.67    3.31  1.0000
  -1  -5   1    5697     389                                                        5107   -1.85    1.92  1.0000
   1  -5   1    5325     395                                                        4753   -1.85    1.91  1.0000
  -1   5  -1    5414     356                                                        4771   -1.85   -1.91  1.0000
   1  -5  -1    5769     390                                                        5179   -1.84    1.90  1.0000
  -1   5  -1    4466     396                                                        3872   -1.85   -1.91  1.0000
   1   5  -1    5698     415                                                        5038   -1.85   -1.92  1.0000
  -1   5   1    5103     364                                                        4477   -1.84   -1.90  1.0000
   1   5  -1    5266     327                                                        4628   -1.85   -1.92  1.0000
   1   5   1    5063     363                                                        4438   -1.84   -1.90  1.0000
  -1   5   1    5054     429                                                        4430   -1.84   -1.90  1.0000
   1   5   1    5104     388                                                        4477   -1.84   -1.90  1.0000
  -1  -5  -1    5486     353                                                        4908   -1.84    1.90  1.0000
   2   5  -1   10844     512                                                       12048    1.54    1.05  1.0000
   2   5   1   10813     609                                                       12001    1.53    1.06  1.0000
  -2   5   1    9208     499                                                       10306    1.53    1.06  1.0000
   2   5   1   11022     581                                                       12222    1.53    1.06  1.0000
  -2   5   1   10287     678                                                       11448    1.53    1.06  1.0000
   2  -5   1   10426     612                                                       11443    1.53   -1.06  1.0000
  -2  -5   1   11041     567                                                       12105    1.54   -1.05  1.0000
   2  -5  -1    9398     578                                                       10367    1.53   -1.06  1.0000
  -2  -5  -1   10812     519                                                       11850    1.53   -1.06  1.0000
  -2   5  -1   10513     542                                                       11683    1.53    1.06  1.0000
  -2   5  -1   10739     668                                                       11922    1.53    1.06  1.0000
   2   5  -1    9139     579                                                       10244    1.54    1.05  1.0000
  -3   5   1    7153     805                                                       15185  -10.81   -1.23  1.0000
  -3   5  -1    7295     754                                                       15417  -10.84   -1.26  1.0000
   3  -5  -1    7778     722                                                       15985  -10.81    1.23  1.0000
   3  -5   1    7846     745                                                       16105  -10.84    1.26  1.0000
  -3  -5   1    8115     681                                                       16498  -10.83    1.26  1.0000
  -3   5   1    6866     580                                                       14745  -10.81   -1.23  1.0000
   3   5   1    6926     652                                                       14845  -10.83   -1.25  1.0000
   3   5  -1    7192     746                                                       15254  -10.83   -1.26  1.0000
  -3   5  -1    7984     607                                                       16454  -10.84   -1.26  1.0000
   3   5   1    7499     750                                                       15717  -10.83   -1.25  1.0000
   3   5  -1    7186     626                                                       15244  -10.83   -1.26  1.0000
  -3  -5  -1    7371     640                                                       15382  -10.83    1.25  1.0000
   4   5  -1   47531    1291                                                       41140    2.70    2.08  1.0000
   4  -5   1   50475    1321                                                       43849    2.70   -2.07  1.0000
  -4   5  -1   47661    1354                                                       41267    2.70    2.07  1.0000
  -4   5   1   47620    1390                                                       41235    2.69    2.08  1.0000
   4   5   1   50571    1324                                                       43984    2.68    2.08  1.0000
   4   5   1   50562    1247                                                       43975    2.68    2.08  1.0000
  -4   5   1   48702    1011                                                       42243    2.69    2.08  1.0000
   4  -5  -1   48817    1295                                                       42314    2.69   -2.08  1.0000
   4   5   1   50521    1209                                                       43937    2.68    2.08  1.0000
  -4   5  -1   50434    1036                                                       43850    2.70    2.07  1.0000
   4   5  -1   51012    1209                                                       44383    2.70    2.08  1.0000
   5   5   1   49103    1461                                                       49820    1.18    2.43  1.0000
   5   5   1   47881    1361                                                       48587    1.18    2.43  1.0000
   5   5   1   46942    1392                                                       47639    1.18    2.43  1.0000
  -5   5   1   48812    1601                                                       49529    1.18    2.44  1.0000
  -5   5  -1   46933    1523                                                       47631    1.16    2.41  1.0000
   5  -5  -1   45859    1456                                                       46619    1.18   -2.44  1.0000
   5  -5   1   46278    1475                                                       47039    1.16   -2.41  1.0000
   5   5  -1   49162    1442                                                       49885    1.17    2.42  1.0000
   5   5  -1   44722    1369                                                       45405    1.17    2.42  1.0000
   5   5  -1   45866    1360                                                       46559    1.17    2.42  1.0000
   6  -5  -1    2626     464                                                        2620    2.94    0.88  1.0000
   6   5   1    3680     491                                                        3740    2.94   -0.87  1.0000
   6   5   1    2700     492                                                        2723    2.94   -0.87  1.0000
   6   5   1    3011     460                                                        3046    2.94   -0.87  1.0000
   6   5  -1    3281     467                                                        3330    2.95   -0.87  1.0000
   6   5  -1    4025     502                                                        4101    2.95   -0.87  1.0000
  -6   5  -1    3399     592                                                        3452    2.95   -0.87  1.0000
   6  -5   1    3256     522                                                        3274    2.95    0.87  1.0000
   6   5  -1    2694     473                                                        2720    2.95   -0.87  1.0000
  -6   5   1    3479     594                                                        3533    2.94   -0.88  1.0000
  -7   5  -1   17004    1072                                                       18059   -0.04   -0.91  1.0000
   7   5  -1   18457    1002                                                       19549   -0.03   -0.91  1.0000
   7   5  -1   17944     982                                                       19021   -0.03   -0.91  1.0000
   7   5   1   18832     967                                                       19929   -0.03   -0.91  1.0000
   7  -5  -1   19122    1075                                                       20202   -0.01    0.90  1.0000
   7  -5   1   19851    1079                                                       20981   -0.04    0.91  1.0000
   7   5   1   19867    1024                                                       20994   -0.03   -0.91  1.0000
  -7   5   1   17002    1142                                                       18030   -0.01   -0.90  1.0000
   7   5  -1   19175    1022                                                       20287   -0.03   -0.91  1.0000
   7   5   1   18777    1055                                                       19873   -0.03   -0.91  1.0000
   8  -5  -1    7201     722                                                        6261    1.87    0.80  1.0000
   8   5  -1    5998     675                                                        5139    1.88   -0.80  1.0000
  -8   5   1    6513     763                                                        5618    1.87   -0.80  1.0000
   8   5   1    7036     691                                                        6111    1.86   -0.80  1.0000
  -8  -5   1    5646     620                                                        4812    1.88    0.80  1.0000
   8   5   1    6714     727                                                        5810    1.86   -0.80  1.0000
   8  -5   1    6074     718                                                        5220    1.87    0.78  1.0000
  -8   5  -1    5384     763                                                        4579    1.87   -0.78  1.0000
  -9  -5   1    1521     526                                                        1166    1.51    1.48  1.0000
   9   5  -1    1181     561                                                         821    1.51   -1.48  1.0000
  -9   5   1     833     635                                                         529    1.52   -1.47  1.0000
  -9  -5  -1     688     503                                                         436    1.51    1.48  1.0000
   9  -5   1    1292     554                                                         961    1.51    1.48  1.0000
   9   5   1     697     509                                                         415    1.51   -1.48  1.0000
  -9   5  -1    1603     662                                                        1188    1.51   -1.48  1.0000
   9  -5  -1    1142     547                                                         832    1.52    1.47  1.0000
  10  -5  -1    2415     697                                                        2893   -0.49    1.81  1.0000
 -10   5   1    1978     833                                                        2308   -0.49   -1.81  1.0000
  10  -5   1    1679     736                                                        2069   -0.49    1.80  1.0000
 -10  -5  -1    1047     629                                                        1350   -0.49    1.81  1.0000
  10   5  -1    1348     681                                                        1610   -0.48   -1.80  1.0000
 -10  -5   1    2541     674                                                        3028   -0.48    1.80  1.0000
 -10   5  -1    1449     761                                                        1721   -0.49   -1.80  1.0000
   1  -6   1   78881    1987                                                       87755    0.88   -4.38  1.0000
  -1   6   1   78796    1999                                                       87353    0.90    4.40  1.0000
  -1   6   1   78904    2048                                                       87467    0.90    4.40  1.0000
  -1   6  -1   80752    2000                                                       89415    0.88    4.38  1.0000
   1   6   1   80414    1953                                                       89085   -0.87   -4.39  1.0000
  -1  -6  -1   78577    1897                                                       87459   -0.87    4.39  1.0000
   1   6  -1   81245    2090                                                       89939   -0.89   -4.39  1.0000
   1  -6  -1   79546    1941                                                       88460    0.90   -4.40  1.0000
   1   6   1   83312    2103                                                       92137   -0.87   -4.39  1.0000
  -1  -6   1   80222    1968                                                       89177   -0.89    4.39  1.0000
   1   6  -1   80324    1886                                                       88969   -0.89   -4.39  1.0000
  -1   6  -1   82055    2019                                                       90788    0.88    4.38  1.0000
   2   6  -1     446     288                                                        1487   -0.26    3.89  1.0000
  -2   6  -1    1045     324                                                        2473    0.25   -3.88  1.0000
  -2   6   1     847     324                                                        2167    0.24   -3.89  1.0000
   2  -6  -1     810     357                                                        2107    0.24    3.89  1.0000
  -2  -6   1     757     326                                                        2021   -0.26   -3.89  1.0000
   2  -6   1    1181     370                                                        2681    0.25    3.88  1.0000
   2   6   1     813     351                                                        2114   -0.26    3.89  1.0000
  -2  -6  -1     774     321                                                        2050   -0.26   -3.89  1.0000
  -2   6  -1    1064     435                                                        2502    0.25   -3.88  1.0000
   2   6   1     846     342                                                        2166   -0.26    3.89  1.0000
  -2   6   1     868     468                                                        2200    0.24   -3.89  1.0000
   2   6  -1     821     356                                                        2126   -0.26    3.89  1.0000
  -3  -6  -1    2461     417                                                        4547   -2.07    3.40  1.0000
  -3   6   1    2320     562                                                        4353    2.08    3.39  1.0000
   3  -6   1    2869     504                                                        5099    2.08   -3.39  1.0000
   3   6   1    2644     489                                                        4792   -2.07   -3.40  1.0000
   3   6  -1    2944     420                                                        5198   -2.08   -3.40  1.0000
   3  -6  -1    2683     470                                                        4849    2.08   -3.39  1.0000
   3   6   1    3130     464                                                        5440   -2.07   -3.40  1.0000
   3   6  -1    2971     519                                                        5234   -2.08   -3.40  1.0000
  -3  -6   1    3407     477                                                        5811   -2.08    3.40  1.0000
  -3   6  -1    2258     388                                                        4270    2.08    3.39  1.0000
  -3   6   1    2440     386                                                        4518    2.08    3.39  1.0000
  -3   6  -1    2438     567                                                        4516    2.08    3.39  1.0000
   4  -6   1   14757    1016                                                       24227    3.61   -7.04  1.0000
  -4   6  -1   14806    1082                                                       24368    3.61    7.04  1.0000
   4   6   1   13197     975                                                       22281   -3.61   -7.04  1.0000
  -4   6  -1   13285     779                                                       22401    3.61    7.04  1.0000
   4   6  -1   14837    1033                                                       24399   -3.60   -7.04  1.0000
  -4  -6   1   14247     923                                                       23563   -3.60    7.04  1.0000
   4   6  -1   13673     884                                                       22897   -3.60   -7.04  1.0000
   4  -6  -1   14340     998                                                       23662    3.59   -7.02  1.0000
  -4   6   1   14465     790                                                       23899    3.59    7.02  1.0000
   4   6   1   13642     926                                                       22859   -3.61   -7.04  1.0000
  -4   6   1   14284    1122                                                       23666    3.59    7.02  1.0000
  -4  -6  -1   13839     874                                                       23037   -3.61    7.04  1.0000
   5  -6  -1    8187     689                                                        8522   -1.11    1.79  1.0000
  -5   6  -1    8585     763                                                        8921   -1.13   -1.79  1.0000
   5   6  -1    8255     665                                                        8575    1.12    1.77  1.0000
  -5   6   1    9776     829                                                       10150   -1.11   -1.79  1.0000
   5   6  -1    8406     653                                                        8729    1.12    1.77  1.0000
   5   6   1    8206     673                                                        8533    1.13    1.79  1.0000
   5   6   1    8921     666                                                        9266    1.13    1.79  1.0000
   5  -6   1    9028     699                                                        9374   -1.13    1.79  1.0000
   5   6   1    7980     618                                                        8301    1.13    1.79  1.0000
   5   6  -1    7993     617                                                        8306    1.12    1.77  1.0000
   6   6  -1    6853     663                                                        7700   -0.93    0.73  1.0000
   6  -6   1    5906     679                                                        6708    0.93    0.72  1.0000
   6   6  -1    7152     636                                                        8017   -0.93    0.73  1.0000
  -6   6   1    6519     756                                                        7344    0.92   -0.75  1.0000
   6  -6  -1    6783     658                                                        7645    0.92    0.75  1.0000
   6   6   1    5932     653                                                        6724   -0.93    0.74  1.0000
   6   6  -1    6600     674                                                        7432   -0.93    0.73  1.0000
   6   6   1    6683     642                                                        7523   -0.93    0.74  1.0000
  -6   6  -1    6473     763                                                        7292    0.93   -0.72  1.0000
   6   6   1    5847     630                                                        6634   -0.93    0.74  1.0000
  -7   6  -1   17209    1169                                                       18436   -0.94   -1.66  1.0000
   7  -6  -1   15376    1042                                                       16549   -0.92    1.65  1.0000
   7   6  -1   18979    1038                                                       20262    0.93    1.65  1.0000
   7   6   1   16201    1011                                                       17386    0.95    1.66  1.0000
  -7   6   1   18241    1210                                                       19508   -0.92   -1.65  1.0000
   7   6   1   16151     955                                                       17335    0.95    1.66  1.0000
   7   6  -1   16561    1046                                                       17757    0.93    1.65  1.0000
   7   6  -1   19451    1050                                                       20750    0.93    1.65  1.0000
   7  -6   1   15590    1040                                                       16768   -0.94    1.66  1.0000
   7   6   1   18631    1058                                                       19905    0.95    1.66  1.0000
   8   6  -1     874     510                                                         787    0.23   -0.47  1.0000
   8  -6  -1     877     511                                                         799   -0.24   -0.46  1.0000
  -8   6   1    1030     660                                                         934   -0.24    0.46  1.0000
  -8   6  -1     852     602                                                         766   -0.23    0.48  1.0000
   8   6   1     970     540                                                         879    0.23   -0.46  1.0000
  -8  -6   1    1390     473                                                        1294    0.23    0.47  1.0000
   8  -6   1    1056     472                                                         973   -0.23   -0.48  1.0000
   8   6   1     944     515                                                         854    0.23   -0.46  1.0000
  -9  -6   1     598     526                                                         574   -0.30   -0.61  1.0000
   9  -6  -1    1815     609                                                        1780    0.30    0.62  1.0000
  -9   6  -1    1670     736                                                        1647    0.30   -0.62  1.0000
  -9   6   1    1081     656                                                        1062    0.30   -0.62  1.0000
   9   6  -1     559     576                                                         543   -0.30    0.61  1.0000
  -9  -6  -1     876     524                                                         847   -0.29   -0.62  1.0000
   9  -6   1    1165     579                                                        1134    0.30    0.62  1.0000
   0   7   1    3775     583                                                        7738   -5.99   -4.54  1.0000
   0   7  -1    3819     582                                                        7795   -5.96   -4.53  1.0000
   0   7   1    3824     585                                                        7811   -5.99   -4.54  1.0000
   0  -7  -1    4038     597                                                        8104   -5.99    4.54  1.0000
   0   7  -1    4296     576                                                        8496   -5.96   -4.53  1.0000
   0  -7   1    4409     612                                                        8637   -5.96    4.53  1.0000
  -1   7  -1    9696     607                                                        7964   -3.41   -2.99  1.0000
  -1   7   1    9480     586                                                        7765   -3.40   -2.98  1.0000
  -1  -7  -1    9455     570                                                        7840   -3.40    2.99  1.0000
   1   7   1   10617     607                                                        8814   -3.40   -2.99  1.0000
   1   7  -1   10419     548                                                        8633   -3.41   -2.99  1.0000
  -1   7   1   10383     650                                                        8600   -3.40   -2.98  1.0000
   1   7   1   10002     609                                                        8244   -3.40   -2.99  1.0000
  -1   7  -1    9512     601                                                        7794   -3.41   -2.99  1.0000
   1  -7  -1    9676     568                                                        8048   -3.40    2.98  1.0000
  -1  -7   1    9363     582                                                        7758   -3.41    2.99  1.0000
   1   7  -1    9614     593                                                        7888   -3.41   -2.99  1.0000
   1  -7   1    8272     556                                                        6747   -3.41    2.99  1.0000
  -2   7   1   27442    1080                                                       25992   -1.00   -0.57  1.0000
   2   7   1   24669     885                                                       23296   -1.00   -0.56  1.0000
   2   7  -1   25980     844                                                       24593   -0.98   -0.56  1.0000
   2   7   1   25769    1009                                                       24366   -1.00   -0.56  1.0000
  -2   7   1   25766     927                                                       24362   -1.00   -0.57  1.0000
  -2  -7  -1   26181     896                                                       24866   -1.00    0.56  1.0000
  -2  -7   1   23702     898                                                       22473   -0.98    0.56  1.0000
   2  -7   1   25536     972                                                       24251   -0.99    0.55  1.0000
  -2   7  -1   25065    1054                                                       23696   -0.99   -0.55  1.0000
   2   7  -1   23030    1001                                                       21725   -0.98   -0.56  1.0000
  -2   7  -1   24849     912                                                       23486   -0.99   -0.55  1.0000
   2  -7  -1   24797     925                                                       23519   -1.00    0.57  1.0000
   3  -7  -1   46798    1305                                                       41264   -3.55   -5.06  1.0000
  -3   7   1   47784    1460                                                       42250   -3.55    5.06  1.0000
  -3   7  -1   48386    1222                                                       42832   -3.56    5.06  1.0000
  -3   7   1   47490    1222                                                       41971   -3.55    5.06  1.0000
  -3  -7  -1   47080    1232                                                       41538   -3.56   -5.06  1.0000
   3   7  -1   48080    1417                                                       42542   -3.57    5.06  1.0000
   3   7   1   48102    1434                                                       42559   -3.56    5.06  1.0000
   3  -7   1   46640    1350                                                       41126   -3.56   -5.06  1.0000
  -3  -7   1   48659    1295                                                       43036   -3.57   -5.06  1.0000
   3   7   1   47002    1253                                                       41517   -3.56    5.06  1.0000
  -3   7  -1   44900    1387                                                       39534   -3.56    5.06  1.0000
   3   7  -1   47428    1193                                                       41925   -3.57    5.06  1.0000
  -4  -7   1   57916    1671                                                       62195   -1.60   -3.77  1.0000
  -4   7  -1   55945    1838                                                       59292   -1.60    3.76  1.0000
   4   7   1   58728    1830                                                       62180   -1.61    3.76  1.0000
   4   7  -1   58671    1822                                                       62119   -1.60    3.77  1.0000
  -4   7  -1   57553    1523                                                       60952   -1.60    3.76  1.0000
   4   7  -1   54816    1550                                                       58141   -1.60    3.77  1.0000
  -4  -7  -1   59091    1626                                                       63415   -1.61   -3.76  1.0000
   4   7   1   59181    1646                                                       62647   -1.61    3.76  1.0000
   4  -7  -1   55958    1710                                                       60176   -1.61   -3.77  1.0000
  -4   7   1   57796    1898                                                       61233   -1.61    3.77  1.0000
   4  -7   1   55305    1732                                                       59467   -1.60   -3.76  1.0000
  -5  -7   1     189     388                                                        1094    5.15    4.40  1.0000
   5   7  -1     444     451                                                        1272    5.15   -4.40  1.0000
  -5   7  -1     324     500                                                         709    5.14   -4.42  1.0000
   5   7   1     321     414                                                         593    5.16   -4.41  1.0000
  -5  -7  -1     160     382                                                         782    5.16    4.41  1.0000
   5   7   1     701     473                                                        1948    5.16   -4.41  1.0000
   5  -7  -1     192     438                                                        1111    5.16    4.40  1.0000
  -5   7   1     323     574                                                         675    5.16   -4.40  1.0000
   5  -7   1     268     473                                                        1453    5.14    4.42  1.0000
   5   7  -1     529     359                                                         103    5.15   -4.40  1.0000
  -6   7   1   15228    1092                                                       14026   -2.49   -0.05  1.0000
   6  -7   1   15542     912                                                       14328   -2.47    0.04  1.0000
  -6  -7   1   16863     887                                                       15602   -2.47    0.04  1.0000
   6  -7  -1   17729     975                                                       16435   -2.49    0.05  1.0000
   6   7   1   15088     861                                                       13890   -2.49   -0.05  1.0000
   6   7  -1   17731     974                                                       16443   -2.47   -0.04  1.0000
   6   7   1   17257     970                                                       15981   -2.49   -0.05  1.0000
   6   7  -1   15075     872                                                       13881   -2.47   -0.04  1.0000
  -6   7  -1   17439    1103                                                       16160   -2.47   -0.04  1.0000
   7  -7   1    4857     701                                                        5511   -0.60    2.17  1.0000
   7  -7  -1    5054     720                                                        5719   -0.60    2.14  1.0000
   7   7  -1    4178     661                                                        4948   -0.60   -2.15  1.0000
   7   7   1    6244     728                                                        7187   -0.59   -2.15  1.0000
   7   7  -1    4466     683                                                        5264   -0.60   -2.15  1.0000
   7   7   1    4874     694                                                        5703   -0.59   -2.15  1.0000
  -7   7  -1    5054     781                                                        5907   -0.60   -2.17  1.0000
  -7   7   1    3342     792                                                        4025   -0.60   -2.14  1.0000
   8  -7   1    1514     550                                                         775   -1.04   -2.47  1.0000
   8  -7  -1    2174     562                                                        1272   -1.05   -2.47  1.0000
  -8   7  -1     448     644                                                          96   -1.04    2.47  1.0000
   8   7   1    1347     573                                                         660   -1.05    2.47  1.0000
  -8   7   1     145     647                                                        -177   -1.05    2.47  1.0000
   9  -7  -1    3991     755                                                        4230    0.76   -0.07  1.0000
   9  -7   1    3123     719                                                        3330    0.76   -0.05  1.0000
  -9   7  -1    1087     792                                                        1198    0.76    0.05  1.0000
  -9   7   1    2978     908                                                        3170    0.76    0.07  1.0000
  -1  -8   1   60397    1798                                                       68726   -0.72    3.62  1.0000
   1  -8   1   63589    1856                                                       72087    0.70   -3.61  1.0000
   1   8   1   64778    1812                                                       73365   -0.69   -3.62  1.0000
  -1  -8  -1   63340    1785                                                       71833   -0.69    3.62  1.0000
  -1   8   1   65917    1933                                                       74612    0.73    3.62  1.0000
   1   8  -1   62707    1715                                                       71189   -0.72   -3.62  1.0000
  -1   8   1   62849    1897                                                       71346    0.73    3.62  1.0000
  -1   8  -1   63220    1845                                                       71695    0.70    3.61  1.0000
   1  -8  -1   60139    1788                                                       68455    0.73   -3.62  1.0000
   1   8  -1   64042    1989                                                       72612   -0.72   -3.62  1.0000
   1   8   1   62904    1967                                                       71369   -0.69   -3.62  1.0000
  -1   8  -1   63894    1920                                                       72413    0.70    3.61  1.0000
   2   8   1   27032    1068                                                       31121    2.59   -0.86  1.0000
  -2   8   1   28324    1286                                                       32523   -2.60    0.87  1.0000
   2   8   1   27210    1266                                                       31312    2.59   -0.86  1.0000
   2   8  -1   26286    1237                                                       30337    2.60   -0.87  1.0000
  -2   8  -1   26319    1233                                                       30369   -2.60    0.88  1.0000
  -2  -8   1   27706    1127                                                       31916    2.60    0.87  1.0000
   2  -8   1   25840    1163                                                       29909   -2.60   -0.88  1.0000
  -2   8  -1   27387    1141                                                       31515   -2.60    0.88  1.0000
   2   8  -1   29433    1056                                                       33711    2.60   -0.87  1.0000
   2  -8  -1   26121    1124                                                       30214   -2.60   -0.87  1.0000
  -2  -8  -1   27951    1108                                                       32161    2.59    0.86  1.0000
  -2   8   1   28390    1159                                                       32594   -2.60    0.87  1.0000
   3   8  -1   17582     753                                                       15350   -3.04   -0.61  1.0000
  -3   8   1   19143    1064                                                       16826    3.04    0.61  1.0000
  -3   8  -1   18547     825                                                       16278    3.03    0.60  1.0000
   3   8   1   18699     836                                                       16411   -3.03   -0.61  1.0000
   3   8   1   19229     973                                                       16910   -3.03   -0.61  1.0000
  -3   8   1   17225     801                                                       15025    3.04    0.61  1.0000
  -3   8  -1   18764    1101                                                       16482    3.03    0.60  1.0000
  -3  -8  -1   16913     767                                                       14673   -3.03    0.61  1.0000
  -3  -8   1   18148     826                                                       15816   -3.04    0.61  1.0000
   3  -8  -1   17693     856                                                       15399    3.04   -0.61  1.0000
   3   8  -1   18970     930                                                       16653   -3.04   -0.61  1.0000
   3  -8   1   18698     914                                                       16354    3.03   -0.60  1.0000
   4  -8   1    6410     577                                                        5052    4.18    1.28  1.0000
  -4   8  -1    6640     724                                                        5254    4.18   -1.28  1.0000
   4  -8  -1    7321     611                                                        5891    4.16    1.27  1.0000
   4   8   1    5962     630                                                        4631   -4.19    1.29  1.0000
   4   8   1    6641     557                                                        5249   -4.19    1.29  1.0000
  -4   8   1    7827     767                                                        6347    4.16   -1.27  1.0000
  -4  -8   1    6462     544                                                        5100   -4.17   -1.28  1.0000
   4   8  -1    5967     626                                                        4642   -4.17    1.28  1.0000
  -4  -8  -1    6408     540                                                        5044   -4.19   -1.29  1.0000
   5   8   1    7682     685                                                        8779   -2.78   -3.41  1.0000
   5   8   1    6836     737                                                        7852   -2.78   -3.41  1.0000
  -5   8   1    7666     901                                                        8758    2.80    3.42  1.0000
  -5  -8   1    5889     628                                                        6801   -2.80    3.43  1.0000
  -5   8  -1    7583     869                                                        8671    2.78    3.41  1.0000
  -5  -8  -1    7616     665                                                        8693   -2.78    3.41  1.0000
   5   8  -1    7125     775                                                        8176   -2.80   -3.43  1.0000
   5  -8  -1    7458     735                                                        8517    2.80   -3.42  1.0000
   5  -8   1    7583     755                                                        8658    2.78   -3.41  1.0000
   6   8  -1   12449     970                                                       12767   -0.76   -0.16  1.0000
   6  -8   1   11865     917                                                       12151    0.77   -0.17  1.0000
   6  -8  -1   12076     931                                                       12371    0.75   -0.15  1.0000
  -6  -8   1   13914     919                                                       14228   -0.76    0.16  1.0000
  -6   8  -1   14011    1105                                                       14345    0.77    0.17  1.0000
   6   8   1   15984     952                                                       16364   -0.77   -0.15  1.0000
  -6   8   1   11761    1065                                                       12073    0.75    0.15  1.0000
   6   8   1   12162     943                                                       12493   -0.77   -0.15  1.0000
   7   8   1      11     466                                                         -99   -0.36   -0.63  1.0000
  -7   8   1    1342     721                                                        1212    0.38    0.63  1.0000
   7   8  -1      11     470                                                        -173   -0.38   -0.63  1.0000
   7  -8   1     581     502                                                         501    0.37   -0.62  1.0000
  -7   8  -1     913     674                                                         807    0.37    0.62  1.0000
   7  -8  -1      11     457                                                         -81    0.38   -0.63  1.0000
   8  -8  -1    1178     587                                                        1301    0.15   -0.52  1.0000
  -8   8  -1    1944     783                                                        2106    0.14    0.54  1.0000
  -8   8   1     663     745                                                         757    0.15    0.52  1.0000
   8  -8   1    1265     588                                                        1394    0.14   -0.54  1.0000
   0   9  -1     430     392                                                         554   -6.88    3.07  1.0000
   0  -9  -1     537     429                                                        1053   -6.90   -3.06  1.0000
   0   9  -1     456     447                                                        1096   -6.88    3.07  1.0000
   0   9   1     464     454                                                        1130   -6.90    3.06  1.0000
   0  -9   1     576     438                                                        1222   -6.88   -3.07  1.0000
   0   9   1     424     394                                                         622   -6.90    3.06  1.0000
   1  -9  -1    9753     708                                                        9426   -0.33   -0.35  1.0000
   1   9   1   10492     724                                                       10184   -0.33    0.35  1.0000
  -1  -9   1   11720     814                                                       11349   -0.35   -0.35  1.0000
  -1   9  -1   10140     747                                                        9823   -0.35    0.35  1.0000
  -1   9   1    8952     713                                                        8664   -0.33    0.35  1.0000
   1   9   1   10313     788                                                       10008   -0.33    0.35  1.0000
  -1   9  -1    9156     703                                                        8855   -0.35    0.35  1.0000
   1   9  -1    9845     772                                                        9531   -0.35    0.35  1.0000
  -1   9   1    8773     748                                                        8488   -0.33    0.35  1.0000
  -1  -9  -1   10094     705                                                        9766   -0.33   -0.35  1.0000
   1  -9   1   11044     784                                                       10686   -0.35   -0.35  1.0000
  -2   9   1   27271    1229                                                       26493    0.34    1.28  1.0000
   2   9   1   29910    1251                                                       29089    0.34    1.30  1.0000
   2  -9   1   28046    1160                                                       27195    0.37   -1.31  1.0000
  -2   9   1   28885    1145                                                       28085    0.34    1.28  1.0000
  -2  -9  -1   29646    1100                                                       28762    0.34   -1.30  1.0000
  -2  -9   1   28950    1145                                                       28083    0.36   -1.31  1.0000
   2   9  -1   28285    1253                                                       27494    0.36    1.31  1.0000
   2  -9  -1   27867    1116                                                       27017    0.34   -1.28  1.0000
  -2   9  -1   28705    1146                                                       27912    0.37    1.31  1.0000
  -2   9  -1   27566    1224                                                       26788    0.37    1.31  1.0000
   2   9   1   27147    1051                                                       26364    0.34    1.30  1.0000
  -3   9   1    7256     828                                                        8457   -0.42    3.19  1.0000
   3  -9   1    6637     707                                                        8178   -0.42   -3.20  1.0000
  -3   9   1    6822     669                                                        7983   -0.42    3.19  1.0000
   3   9   1    5950     744                                                        7022   -0.41    3.20  1.0000
  -3  -9   1    6483     683                                                        8012   -0.43   -3.20  1.0000
  -3   9  -1    7810     852                                                        9061   -0.42    3.20  1.0000
  -3   9  -1    5620     632                                                        6663   -0.42    3.20  1.0000
   3  -9  -1    6410     681                                                        7922   -0.42   -3.19  1.0000
   3   9   1    6379     634                                                        7493   -0.41    3.20  1.0000
  -3  -9  -1    6773     662                                                        8325   -0.41   -3.20  1.0000
   3   9  -1    6827     776                                                        7997   -0.43    3.20  1.0000
   4   9  -1     989     496                                                         959    0.66   -0.64  1.0000
   4  -9   1    1830     498                                                        1784    0.67    0.64  1.0000
  -4   9  -1    1763     669                                                        1730    0.67   -0.64  1.0000
   4  -9  -1     598     426                                                         561    0.65    0.65  1.0000
   4   9   1    1314     489                                                        1278    0.66   -0.65  1.0000
  -4  -9   1    1073     454                                                        1033    0.66    0.64  1.0000
  -4   9   1    1332     655                                                        1295    0.65   -0.65  1.0000
   5  -9  -1    5176     674                                                        5376    3.28    1.92  1.0000
   5   9   1    5257     741                                                        5455    3.28   -1.92  1.0000
   5   9  -1    4205     647                                                        4350    3.26   -1.91  1.0000
  -5  -9   1    4320     614                                                        4478    3.26    1.91  1.0000
  -5   9   1    5779     901                                                        5999    3.28   -1.92  1.0000
   5  -9   1    4559     667                                                        4732    3.27    1.92  1.0000
  -5   9  -1    5478     872                                                        5688    3.27   -1.92  1.0000
   6  -9  -1    6321     771                                                        7196    0.37    1.36  1.0000
   6   9   1    5201     793                                                        5990    0.38   -1.35  1.0000
   6  -9   1    4831     730                                                        5587    0.40    1.35  1.0000
   6   9  -1    6737     850                                                        7628    0.39   -1.35  1.0000
  -6   9   1    4958     935                                                        5734    0.37   -1.36  1.0000
  -6   9  -1    5647     933                                                        6463    0.40   -1.35  1.0000
   7  -9   1     936     605                                                        1736   -2.73   -0.34  1.0000
   7  -9  -1    1360     615                                                        2302   -2.73   -0.36  1.0000
   7   9   1     460     562                                                         992   -2.72    0.35  1.0000
   7   9  -1     894     613                                                        1622   -2.74    0.36  1.0000
  -7   9  -1     275     741                                                         702   -2.73    0.34  1.0000
  -7   9   1    1025     807                                                        1796   -2.73    0.36  1.0000
   8  -9   1     606     575                                                         811    0.23   -0.88  1.0000
   8  -9  -1     505     586                                                         690    0.22   -0.87  1.0000
  -8  -9  -1     383     536                                                         548    0.22   -0.88  1.0000
  -8   9  -1      17     760                                                        -244    0.23    0.88  1.0000
  -8   9   1      16     745                                                        -838    0.22    0.87  1.0000
   1  10  -1    2056     680                                                        5058    2.46   -6.47  1.0000
  -1  10  -1    3258     695                                                        6931   -2.47    6.46  1.0000
   1 -10   1    2778     656                                                        6166   -2.47   -6.46  1.0000
  -1  10   1    2266     649                                                        5396   -2.46    6.47  1.0000
  -1  10   1    2398     669                                                        5607   -2.46    6.47  1.0000
   1 -10  -1    2628     640                                                        5936   -2.46   -6.47  1.0000
   1  10   1    2375     663                                                        5571    2.47   -6.47  1.0000
  -1 -10   1    2600     646                                                        5895    2.46    6.47  1.0000
  -1 -10  -1    3223     648                                                        6848    2.47    6.47  1.0000
  -2  10   1    2911     483                                                        2024    1.27   -1.64  1.0000
   2 -10  -1    2516     464                                                        1697    1.27    1.64  1.0000
   2 -10   1    2294     493                                                        1513    1.28    1.64  1.0000
  -2  10   1    3284     627                                                        2337    1.27   -1.64  1.0000
   2  10   1    1900     491                                                        1193   -1.28    1.65  1.0000
  -2  10  -1    1527     433                                                         903    1.28   -1.64  1.0000
  -2 -10   1      87     443                                                         -85   -1.27   -1.65  1.0000
   2  10  -1    1430     494                                                         828   -1.27    1.65  1.0000
   3 -10   1   15637     998                                                       16471   -1.06   -0.52  1.0000
  -3  10   1   16687     981                                                       17427   -1.05    0.55  1.0000
   3 -10  -1   15591     958                                                       16409   -1.05   -0.55  1.0000
  -3  10  -1   17380    1141                                                       18154   -1.06    0.52  1.0000
  -3  10  -1   17329     971                                                       18101   -1.06    0.52  1.0000
   3  10   1   18874    1176                                                       19668    1.06   -0.55  1.0000
  -3 -10   1   16117     959                                                       16949    1.05    0.54  1.0000
  -3  10   1   16706    1142                                                       17447   -1.05    0.55  1.0000
   3  10  -1   17268    1099                                                       18022    1.05   -0.54  1.0000
  -4  10   1     209     669                                                         395    0.82    0.92  1.0000
   4 -10   1    2104     576                                                        2636    0.83   -0.91  1.0000
   4 -10  -1    1661     538                                                        2138    0.82   -0.92  1.0000
  -4  10  -1    1402     677                                                        1839    0.83    0.91  1.0000
   4  10  -1    1612     614                                                        2075   -0.82   -0.91  1.0000
   4  10   1    1624     617                                                        2092   -0.85   -0.90  1.0000
  -5  10  -1   18030    1317                                                       17779    0.22   -0.51  1.0000
   5 -10  -1   15462    1023                                                       15297    0.24    0.49  1.0000
   5  10  -1   16963    1159                                                       16737   -0.23    0.50  1.0000
  -5  10   1   18888    1382                                                       18657    0.24   -0.49  1.0000
   5  10   1   16127    1146                                                       15906   -0.23    0.49  1.0000
   5 -10   1   15086    1044                                                       14901    0.22    0.51  1.0000
   6  10  -1    1528     698                                                        2608    2.97   -0.32  1.0000
  -6  10  -1    2228     925                                                        3506   -2.96    0.32  1.0000
   6  10   1    1203     638                                                        2169    2.95   -0.31  1.0000
   6 -10  -1    1004     608                                                        1978   -2.97   -0.32  1.0000
   6 -10   1    2169     673                                                        3526   -2.96   -0.32  1.0000
  -6  10   1    3106     926                                                        4600   -2.97    0.32  1.0000
   7  10  -1     793     636                                                        1121    0.51    1.17  1.0000
   7 -10  -1    1051     598                                                        1423   -0.51    1.17  1.0000
  -7  10   1     964     861                                                        1321   -0.51   -1.17  1.0000
  -7  10  -1    1094     889                                                        1480   -0.52   -1.19  1.0000
   7 -10   1     961     636                                                        1325   -0.52    1.19  1.0000
   7  10   1     965     651                                                        1325    0.51    1.17  1.0000
   0 -11   1   33677    1442                                                       37451   -0.44   -2.57  1.0000
   0  11   1   31896    1545                                                       35542   -0.45    2.56  1.0000
   0  11  -1   33998    1567                                                       37776   -0.44    2.57  1.0000
   1  11   1    2354     653                                                        3490    0.34    2.91  1.0000
   1 -11  -1    2848     618                                                        4057    0.33   -2.91  1.0000
  -1  11   1    1667     596                                                        2629    0.33    2.91  1.0000
  -1  11  -1    2532     650                                                        3703    0.32    2.91  1.0000
  -1 -11   1    2287     608                                                        3370    0.32   -2.91  1.0000
   1  11  -1    2893     648                                                        4140    0.32    2.91  1.0000
   1 -11   1    1982     594                                                        2994    0.32   -2.91  1.0000
   2 -11   1    2390     533                                                        1786    2.84   -0.90  1.0000
  -2  11   1    2110     538                                                        1535    2.82    0.89  1.0000
   2 -11  -1    1019     482                                                         598    2.82   -0.89  1.0000
   2  11  -1    2895     607                                                        2235    2.84    0.89  1.0000
  -2  11  -1    2217     550                                                        1626    2.84    0.90  1.0000
   2  11   1    2119     579                                                        1541    2.82    0.89  1.0000
  -3  11  -1    2690     617                                                        3198   -3.40    0.23  1.0000
   3 -11   1    2560     613                                                        3068   -3.40   -0.23  1.0000
   3  11   1    1914     667                                                        2308   -3.38    0.23  1.0000
   3 -11  -1    2195     567                                                        2647   -3.39   -0.23  1.0000
   3  11  -1    2103     676                                                        2530   -3.41    0.23  1.0000
   4  11   1    1714     620                                                        1678    0.10    0.14  1.0000
   4  11  -1     348     571                                                         332    0.11    0.14  1.0000
  -4  11   1       1     642                                                        -121    0.10    0.14  1.0000
   4 -11   1     578     518                                                         557    0.11   -0.15  1.0000
   4 -11  -1     921     503                                                         897    0.10   -0.14  1.0000
   5  11   1    3203     762                                                        3733    1.17   -2.08  1.0000
   5 -11  -1    1725     599                                                        2046    1.17    2.07  1.0000
  -5  11   1    2421     869                                                        2868    1.17   -2.07  1.0000
   5  11  -1    3505     800                                                        4060    1.15   -2.06  1.0000
   5 -11   1    2967     675                                                        3419    1.16    2.07  1.0000
   6  11  -1     825     643                                                         628   -0.96    0.29  1.0000
   6  11   1      20     525                                                        -217   -0.96    0.29  1.0000
   6 -11  -1     938     553                                                         715   -0.97   -0.28  1.0000
  -6  11   1     311     900                                                         193   -0.97    0.28  1.0000
   6 -11   1    1447     605                                                        1167   -0.96   -0.30  1.0000
  -1  12  -1    2300     699                                                        3883    2.55    1.96  1.0000
   1  12  -1    1938     722                                                        3412   -2.56   -1.96  1.0000
  -1  12   1    1530     670                                                        2858    2.55    1.95  1.0000
   1 -12   1    2216     662                                                        3782    2.55   -1.96  1.0000
   1  12   1    2128     697                                                        3658   -2.55   -1.96  1.0000
   2 -12   1     319     501                                                         328   -0.05    0.10  1.0000
  -2  12  -1     160     492                                                         168   -0.05   -0.10  1.0000
   2  12  -1     377     567                                                         392    0.06    0.10  1.0000
   2  12   1     244     569                                                         253    0.04    0.10  1.0000
  -2  12   1       0     475                                                         -69   -0.06   -0.09  1.0000
   3  12   1    2672     729                                                        2310   -0.54    0.66  1.0000
   3 -12   1    1782     565                                                        1477    0.53    0.67  1.0000
   3 -12  -1    3594     629                                                        3154    0.54    0.66  1.0000
   3  12  -1    1990     682                                                        1675   -0.54    0.67  1.0000
   4 -12   1     951     567                                                         916    1.13    0.27  1.0000
   4  12  -1    2421     720                                                        2372   -1.11    0.28  1.0000
   4  12   1    1157     681                                                        1113   -1.13    0.29  1.0000
   4 -12  -1    1941     620                                                        1900    1.11    0.27  1.0000
   5  12   1      37     573                                                         -60   -1.33    0.28  1.0000
   5 -12  -1    1194     614                                                        1545    1.33    0.29  1.0000
   5  12  -1    2002     792                                                        2474   -1.33    0.30  1.0000
   5 -12   1    1306     627                                                        1675    1.33    0.30  1.0000
   0  13   1    1894     628                                                        1462   -1.96    0.59  1.0000
   0  13  -1    1909     678                                                        1477   -1.96    0.59  1.0000
  -1  13   1    3030     686                                                        1975    1.80   -1.82  1.0000
   1  13   1    2596     721                                                        1626    1.81   -1.82  1.0000
  -1  13  -1    2943     691                                                        1904    1.79   -1.83  1.0000
   1  13  -1    5304     810                                                        3877    1.79   -1.83  1.0000
  -2  13   1     787     637                                                        1069   -0.07   -1.61  1.0000
  -2  13  -1     646     619                                                         900   -0.06   -1.62  1.0000
   2  13  -1     382     658                                                         574   -0.06   -1.62  1.0000
   2  13   1    1205     709                                                        1557   -0.08   -1.61  1.0000
   3  13   1      43     572                                                        -416   -1.10    0.96  1.0000
   3  13  -1     420     673                                                         563   -1.13    0.96  1.0000
   1   0  -2    4735     138                                                        2274   -4.71    0.00  1.0000
   1   0   2    5089     146                                                        2519   -4.71    0.01  1.0000
  -1   0   2    5412     156                                                        2750   -4.71    0.00  1.0000
   2   0   2    7785    1402                                                       67892   38.45   -0.01  1.0000
  -2   0   2    8042    1408                                                       68648   38.45    0.02  1.0000
  -2   0  -2    8662    1286                                                       70438   38.45    0.01  1.0000
   2   0   2    8506    1356                                                       69993   38.45   -0.01  1.0000
   2   0  -2    8199    1376                                                       69109   38.45   -0.02  1.0000
  -3   0   2   18199     566                                                       14197   -3.52    0.01  1.0000
  -3   0  -2   17932     406                                                       13954   -3.52   -0.01  1.0000
   3   0   2   18778     565                                                       14703   -3.52    0.01  1.0000
   3   0  -2   19324     567                                                       15192   -3.52   -0.01  1.0000
   3   0  -2   17426     372                                                       13514   -3.52   -0.01  1.0000
   3   0   2   18641     520                                                       14582   -3.52    0.01  1.0000
   4   0  -2    6113     492                                                        9188   -3.95    0.01  1.0000
   4   0   2    5980     496                                                        9021   -3.95    0.00  1.0000
  -4   0  -2    6270     343                                                        9377   -3.95    0.00  1.0000
  -4   0   2    6241     528                                                        9345   -3.95   -0.01  1.0000
  -4   0  -2    6315     517                                                        9432   -3.95    0.00  1.0000
   4   0  -2    6052     305                                                        9113   -3.95    0.01  1.0000
  -5   0  -2   15841     449                                                       13277    2.37   -0.01  1.0000
   5   0  -2   15371     647                                                       12847    2.37    0.00  1.0000
   5   0  -2   15470     394                                                       12938    2.37    0.00  1.0000
  -5   0  -2   15214     702                                                       12704    2.37   -0.01  1.0000
  -5   0   2   15239     661                                                       12726    2.37    0.00  1.0000
   5   0   2   17402     649                                                       14708    2.37    0.01  1.0000
   6   0   2   37342    1236                                                       40119   -1.57   -0.01  1.0000
  -6   0  -2   35458    1294                                                       38164   -1.57    0.01  1.0000
   6   0  -2   34933    1220                                                       37619   -1.57    0.00  1.0000
  -6   0   2   35602    1305                                                       38314   -1.57    0.00  1.0000
   7   0  -2      48     361                                                        -207   -1.54    0.00  1.0000
   7   0   2      48     335                                                        -133   -1.55    0.01  1.0000
  -7   0  -2       1     319                                                          48   -1.55   -0.01  1.0000
  -7   0   2     203     380                                                         444   -1.54    0.00  1.0000
   8   0  -2   53238    1781                                                       55454    1.06    0.00  1.0000
  -8   0  -2   56116    1941                                                       58386    1.06    0.00  1.0000
   8   0   2   51785    1737                                                       53966    1.06    0.00  1.0000
  -8   0   2   56854    1932                                                       59143    1.06    0.00  1.0000
  -9   0  -2     919     507                                                         273   -3.07   -0.01  1.0000
   9   0  -2     437     498                                                          51   -3.07    0.00  1.0000
   9   0   2     190     452                                                        -148   -3.07    0.01  1.0000
  -9   0   2     189     476                                                        -150   -3.07    0.00  1.0000
  10   0   2     320     557                                                         294   -0.17    0.00  1.0000
 -10   0  -2     616     590                                                         580   -0.17    0.00  1.0000
  10   0  -2     137     521                                                         121   -0.16    0.00  1.0000
 -10   0   2       5     577                                                           2   -0.16    0.00  1.0000
  11   0  -2    4277     842                                                        3871   -0.71    0.00  1.0000
 -11   0   2    4975     873                                                        4537   -0.71    0.00  1.0000
 -11   0  -2    5475     907                                                        5013   -0.71   -0.01  1.0000
  11   0   2    4942     860                                                        4505   -0.71    0.01  1.0000
   1   1  -2  324182    1805                                                      100825  -24.84  -53.42  1.0000
  -1  -1  -2  317610    1799                                                       97132  -24.84   53.41  1.0000
   1  -1   2  320553    1810                                                       98760   24.79  -53.42  1.0000
  -1   1  -2  321524    1821                                                       99301   24.79   53.42  1.0000
   1   1  -2  321004    1806                                                       99024  -24.84  -53.42  1.0000
  -1   1   2  325946    1876                                                      101799   24.78   53.42  1.0000
   1  -1  -2  312235    1770                                                       94073   24.78  -53.42  1.0000
   1   1   2  326891    1843                                                      102382  -24.84  -53.41  1.0000
   2  -1   2   47381    1684                                                       86282  -11.93  -12.10  1.0000
  -2  -1   2   45935    1677                                                       84308   11.94   12.09  1.0000
   2  -1  -2   47651    1675                                                       86625  -11.94  -12.09  1.0000
   2   1  -2   49546    1634                                                       89281   11.94  -12.09  1.0000
  -2   1  -2   45131    1718                                                       83335  -11.93   12.10  1.0000
  -2   1   2   49114    1760                                                       88698  -11.94   12.09  1.0000
   2   1   2   47728    1620                                                       86869   11.94  -12.11  1.0000
   2   1   2   48104    1722                                                       87375   11.94  -12.11  1.0000
   2   1  -2   46823    1680                                                       85613   11.94  -12.09  1.0000
  -2  -1  -2   49792    1642                                                       89543   11.94   12.11  1.0000
   3   1   2  259201    3722                                                      207170    7.15   10.31  1.0000
  -3   1  -2  261849    3903                                                      209530   -7.15  -10.32  1.0000
  -3   1   2  261354    3923                                                      209084   -7.14  -10.32  1.0000
   3   1  -2  262011    3654                                                      209704    7.14   10.31  1.0000
   3  -1   2  256420    3776                                                      204450   -7.15   10.32  1.0000
   3   1  -2  260955    3780                                                      208759    7.14   10.31  1.0000
   3   1   2  260183    3862                                                      208048    7.15   10.31  1.0000
  -3  -1  -2  266522    3683                                                      213494    7.15  -10.31  1.0000
  -3  -1   2  259974    3850                                                      207655    7.14  -10.31  1.0000
   3  -1  -2  261023    3792                                                      208562   -7.14   10.32  1.0000
   4   1  -2   25659     699                                                       18477   -5.17    2.18  1.0000
   4  -1   2   24812     674                                                       17767    5.17    2.17  1.0000
  -4  -1   2   26375     708                                                       19089   -5.17   -2.18  1.0000
  -4   1   2   24817     715                                                       17775    5.16   -2.19  1.0000
  -4   1  -2   25838     722                                                       18635    5.17   -2.17  1.0000
  -4  -1  -2   25940     563                                                       18721   -5.17   -2.16  1.0000
   4  -1  -2   24151     677                                                       17214    5.16    2.19  1.0000
   4   1  -2   24797     536                                                       17746   -5.17    2.18  1.0000
   4   1   2   25079     657                                                       17987   -5.17    2.16  1.0000
   4   1   2   25553     701                                                       18389   -5.17    2.16  1.0000
  -5  -1  -2   40699     985                                                       41938   -0.87   -1.42  1.0000
  -5  -1   2   38830    1204                                                       40028   -0.87   -1.41  1.0000
  -5   1  -2   37060    1216                                                       38326    0.84   -1.42  1.0000
   5  -1   2   38965    1186                                                       40203    0.84    1.42  1.0000
   5  -1  -2   36568    1151                                                       37752    0.84    1.41  1.0000
  -5   1   2   39677    1255                                                       40973    0.84   -1.41  1.0000
   5   1  -2   38562     940                                                       39816   -0.87    1.41  1.0000
   5   1   2   38442    1210                                                       39706   -0.87    1.42  1.0000
   5   1   2   38328    1128                                                       39590   -0.87    1.42  1.0000
   5   1  -2   36682    1164                                                       37904   -0.87    1.41  1.0000
   6  -1   2    9707     603                                                        7863   -2.15    0.81  1.0000
   6   1  -2    8577     556                                                        6906    2.16    0.83  1.0000
  -6   1  -2    9513     649                                                        7760   -2.15   -0.81  1.0000
  -6   1   2    9487     637                                                        7727   -2.15   -0.83  1.0000
  -6  -1   2    9636     614                                                        7789    2.16   -0.83  1.0000
  -6  -1  -2    9436     426                                                        7615    2.16   -0.81  1.0000
   6  -1  -2    9486     611                                                        7656   -2.15    0.83  1.0000
   6   1   2    9730     575                                                        7953    2.16    0.81  1.0000
  -6  -1  -2   10649     674                                                        8709    2.16   -0.81  1.0000
   7  -1   2   18818     837                                                       15669   -0.08   -3.35  1.0000
  -7  -1  -2   18650     893                                                       15514    0.07    3.34  1.0000
   7  -1  -2   19563     889                                                       16349   -0.09   -3.36  1.0000
   7   1  -2   18899     879                                                       15763    0.06   -3.35  1.0000
  -7   1  -2   16561     845                                                       13642   -0.08    3.35  1.0000
   7   1   2   19333     859                                                       16173    0.07   -3.34  1.0000
  -7   1   2   18008     906                                                       14960   -0.09    3.36  1.0000
  -7  -1   2   17813     883                                                       14738    0.06    3.35  1.0000
  -8   1  -2   19529    1154                                                       20355   -0.05   -0.99  1.0000
  -8   1   2   19015    1167                                                       19843   -0.05   -0.99  1.0000
  -8  -1   2   21960    1169                                                       22777    0.05   -0.99  1.0000
   8   1   2   22914    1114                                                       23807    0.06    0.97  1.0000
  -8  -1  -2   20255    1149                                                       21031    0.06   -0.97  1.0000
   8   1  -2   21358    1129                                                       22230    0.05    0.99  1.0000
   8  -1   2   19878    1043                                                       20647   -0.05    0.99  1.0000
   8  -1  -2   21458    1120                                                       22270   -0.05    0.99  1.0000
   9   1   2   12550     884                                                       10793    1.59    2.16  1.0000
  -9  -1   2   12332     942                                                       10757    1.59   -2.15  1.0000
   9   1  -2   14122     923                                                       12266    1.59    2.15  1.0000
  -9  -1  -2   12756     948                                                       11149    1.59   -2.16  1.0000
   9  -1   2   12889     897                                                       11276   -1.59    2.15  1.0000
  -9   1  -2   10415     903                                                        8816   -1.59   -2.15  1.0000
  -9   1   2   13293     977                                                       11489   -1.59   -2.15  1.0000
   9  -1  -2   12248     915                                                       10675   -1.59    2.15  1.0000
 -10   1  -2    1927     661                                                        2404   -0.98   -1.86  1.0000
  10  -1   2    1603     590                                                        1951   -0.98    1.86  1.0000
  10   1   2    1423     625                                                        1827    0.98    1.85  1.0000
 -10  -1  -2    2404     703                                                        2843    0.98   -1.85  1.0000
  10  -1  -2    1781     670                                                        2153   -0.98    1.88  1.0000
 -10   1   2    1392     686                                                        1794   -0.98   -1.88  1.0000
 -10  -1   2     875     609                                                        1118    0.98   -1.87  1.0000
  10   1  -2    1157     645                                                        1519    0.98    1.87  1.0000
   0   2   2  192323    2111                                                      116948  -10.38   18.87  1.0000
   0  -2   2  188044    2110                                                      113663  -10.38  -18.88  1.0000
   0   2   2  185705    2151                                                      111800  -10.38   18.87  1.0000
   0   2  -2  193105    2124                                                      117551  -10.38   18.88  1.0000
  -1   2  -2  377486    5082                                                      295313   -9.68  -12.94  1.0000
  -1   2   2  382051    5179                                                      299394   -9.68  -12.93  1.0000
   1   2   2  371309    5106                                                      289913   -9.68  -12.92  1.0000
   1  -2  -2  368308    4969                                                      287745   -9.68   12.93  1.0000
   1  -2   2  366228    5027                                                      285868   -9.68   12.94  1.0000
   1   2  -2  373122    5036                                                      291443   -9.68  -12.94  1.0000
   1   2   2  367489    5031                                                      286538   -9.68  -12.92  1.0000
  -1   2  -2  375447    4989                                                      293509   -9.68  -12.94  1.0000
  -1  -2   2  372348    5021                                                      291269   -9.68   12.94  1.0000
  -2   2  -2     885     394                                                        8849    2.58  -22.31  1.0000
   2  -2  -2     880     426                                                        9557    2.58   22.31  1.0000
   2   2  -2     902     438                                                       10250    2.57  -22.32  1.0000
   2   2   2     902     398                                                        8326    2.56  -22.34  1.0000
   2  -2  -2     878     285                                                        9364    2.58   22.31  1.0000
   2   2  -2     900     362                                                        8413    2.57  -22.32  1.0000
   2   2   2     875     349                                                        9363    2.56  -22.34  1.0000
   2   2  -2     892     393                                                        8582    2.57  -22.32  1.0000
   2   2   2     904     397                                                        8276    2.56  -22.34  1.0000
   2  -2   2     878     457                                                        9179    2.58   22.31  1.0000
  -2   2   2     915     476                                                        8179    2.58  -22.31  1.0000
  -2   2  -2     885     314                                                        8840    2.58  -22.31  1.0000
   3  -2  -2   88047    1302                                                       57183    9.91   -8.46  1.0000
   3   2  -2   82972    1254                                                       53137    9.89    8.46  1.0000
   3   2   2   85937    1204                                                       55501    9.90    8.46  1.0000
  -3   2  -2   86729    1342                                                       56162    9.90    8.44  1.0000
   3   2  -2   86859    1257                                                       56259    9.89    8.46  1.0000
   3   2  -2   86009    1220                                                       55575    9.89    8.46  1.0000
  -3   2   2   82758    1344                                                       52947    9.91    8.46  1.0000
   3   2   2   84888    1297                                                       54658    9.90    8.46  1.0000
   3   2   2   86608    1245                                                       56041    9.90    8.46  1.0000
   3  -2   2   84057    1300                                                       54001    9.90   -8.44  1.0000
   4  -2   2   16889     647                                                       14951   -2.88   -5.96  1.0000
  -4  -2   2   15890     610                                                       13979   -2.89   -5.96  1.0000
  -4   2  -2   16035     672                                                       14204   -2.88    5.96  1.0000
   4   2   2   17441     616                                                       15555   -2.89    5.96  1.0000
  -4   2   2   15301     663                                                       13485   -2.89    5.95  1.0000
   4   2  -2   16363     618                                                       14513   -2.89    5.96  1.0000
   4   2   2   15814     655                                                       13980   -2.89    5.96  1.0000
  -4  -2  -2   17100     562                                                       15145   -2.89   -5.96  1.0000
   4  -2  -2   15726     624                                                       13819   -2.89   -5.95  1.0000
   4   2  -2   16722     555                                                       14861   -2.89    5.96  1.0000
  -5   2   2   15805     896                                                       20098   -5.42   -4.21  1.0000
   5   2   2   16942     835                                                       21404   -5.43   -4.22  1.0000
   5  -2  -2   17415     828                                                       20753   -5.42    4.21  1.0000
   5   2  -2   15201     682                                                       19403   -5.43   -4.23  1.0000
   5   2   2   15829     784                                                       20128   -5.43   -4.22  1.0000
  -5  -2   2   16659     828                                                       19906   -5.43    4.23  1.0000
  -5  -2  -2   17279     704                                                       20602   -5.43    4.22  1.0000
   5  -2   2   16893     851                                                       20163   -5.43    4.24  1.0000
   5   2  -2   16192     826                                                       20543   -5.43   -4.23  1.0000
  -5   2  -2   15630     882                                                       19894   -5.43   -4.24  1.0000
   6   2   2   18784     906                                                       22485   -2.61    1.45  1.0000
   6   2  -2   17848     751                                                       21461   -2.61    1.47  1.0000
  -6  -2  -2   17799     760                                                       21508   -2.61   -1.45  1.0000
   6  -2   2   17733     960                                                       21433   -2.60   -1.47  1.0000
   6   2   2   18507     974                                                       22181   -2.61    1.45  1.0000
   6  -2  -2   17450     949                                                       21124   -2.61   -1.46  1.0000
  -6   2  -2   16774     979                                                       20275   -2.60    1.47  1.0000
  -6   2   2   17997    1014                                                       21621   -2.61    1.46  1.0000
  -6  -2   2   16157     908                                                       19702   -2.61   -1.47  1.0000
   6   2  -2   17224     919                                                       20776   -2.61    1.47  1.0000
  -7   2  -2    5702     647                                                        5512   -0.78   -0.18  1.0000
   7  -2  -2    8049     648                                                        7834   -0.78    0.16  1.0000
  -7   2   2    6815     664                                                        6624   -0.78   -0.16  1.0000
   7   2   2    7763     629                                                        7561   -0.78   -0.15  1.0000
  -7  -2  -2    7103     671                                                        6901   -0.78    0.15  1.0000
   7  -2   2    7404     652                                                        7180   -0.78    0.18  1.0000
   7   2  -2    7895     656                                                        7681   -0.79   -0.17  1.0000
  -7  -2   2    7792     663                                                        7571   -0.79    0.17  1.0000
   8   2   2    7547     766                                                        9588   -1.14   -3.81  1.0000
  -8  -2   2    6721     781                                                        8611   -1.14    3.79  1.0000
   8   2  -2    7024     776                                                        8981   -1.14   -3.79  1.0000
  -8   2  -2    5541     793                                                        7272   -1.13   -3.79  1.0000
   8  -2   2    6262     761                                                        8085   -1.13    3.79  1.0000
   8  -2  -2    5167     715                                                        6817   -1.13    3.79  1.0000
  -8   2   2    5472     805                                                        7195   -1.13   -3.79  1.0000
  -8  -2  -2    7067     810                                                        9016   -1.14    3.81  1.0000
   9  -2  -2    7938     797                                                        8133   -2.76   -0.72  1.0000
   9   2   2    7844     791                                                        8045   -2.77    0.72  1.0000
   9  -2   2    6873     752                                                        7031   -2.77   -0.70  1.0000
  -9  -2   2    8096     837                                                        8291   -2.78   -0.71  1.0000
   9   2  -2    8150     777                                                        8351   -2.78    0.71  1.0000
  -9   2  -2    6579     848                                                        6735   -2.77    0.70  1.0000
  -9  -2  -2    8617     889                                                        8831   -2.77   -0.72  1.0000
  -9   2   2    7504     888                                                        7694   -2.76    0.72  1.0000
 -10  -2   2    6486     835                                                        5598   -1.35    0.43  1.0000
  10  -2   2    6104     757                                                        5248   -1.34    0.42  1.0000
 -10  -2  -2    6708     846                                                        5801   -1.35    0.43  1.0000
  10   2  -2    5511     793                                                        4717   -1.35   -0.43  1.0000
  10   2   2    4861     736                                                        4114   -1.35   -0.43  1.0000
 -10   2  -2    6246     858                                                        5404   -1.34   -0.42  1.0000
 -10   2   2    5865     858                                                        5047   -1.34   -0.43  1.0000
  10  -2  -2    5425     785                                                        4617   -1.34    0.43  1.0000
   1   3   2    9697     685                                                       23199  -14.10   -2.02  1.0000
   1   3  -2   10015     700                                                       23709  -14.10   -2.04  1.0000
   1  -3   2    8887     694                                                       23416   14.09   -2.02  1.0000
   1   3  -2    9811     571                                                       23382  -14.10   -2.04  1.0000
   1  -3  -2    9096     642                                                       23763   14.09   -2.03  1.0000
  -1   3   2    9088     629                                                       22201   14.09    2.03  1.0000
  -1   3  -2   10252     657                                                       24079   14.09    2.02  1.0000
  -1  -3  -2    9214     583                                                       23968  -14.10    2.02  1.0000
  -1  -3   2    9217     680                                                       23976  -14.10    2.04  1.0000
  -1   3   2   10572     786                                                       24585   14.09    2.03  1.0000
  -1   3  -2    9805     649                                                       23364   14.09    2.02  1.0000
   1   3   2    9651     692                                                       23126  -14.10   -2.02  1.0000
   2   3  -2  280812    6149                                                      353107    4.66  -13.68  1.0000
   2   3   2  285458    6004                                                      358317    4.64  -13.68  1.0000
   2   3   2  282619    6220                                                      355136    4.64  -13.68  1.0000
   2   3   2  273605    6148                                                      345021    4.64  -13.68  1.0000
  -2   3  -2  282909    6013                                                      355417   -4.63   13.68  1.0000
  -2   3   2  279370    6320                                                      351399   -4.64   13.67  1.0000
   2   3  -2  271259    6091                                                      342383    4.66  -13.68  1.0000
   2  -3   2  276812    6139                                                      348615   -4.63  -13.68  1.0000
   2  -3  -2  278224    6091                                                      350150   -4.64  -13.67  1.0000
  -2   3   2  280842    5990                                                      353050   -4.64   13.67  1.0000
   2   3  -2  278137    6105                                                      350106    4.66  -13.68  1.0000
  -2   3  -2  276902    6228                                                      348680   -4.63   13.68  1.0000
  -3   3  -2   23184     459                                                       15680   -9.00   -4.57  1.0000
  -3   3  -2   22871     643                                                       15414   -9.00   -4.57  1.0000
   3  -3  -2   22155     420                                                       14778   -8.99    4.57  1.0000
   3  -3   2   23042     655                                                       15527   -9.00    4.57  1.0000
   3   3   2   22228     543                                                       14873    9.00    4.57  1.0000
   3  -3  -2   22642     628                                                       15191   -8.99    4.57  1.0000
   3   3  -2   23227     608                                                       15727    8.99    4.57  1.0000
   3   3  -2   23053     562                                                       15579    8.99    4.57  1.0000
  -3   3   2   23436     703                                                       15899   -8.99   -4.57  1.0000
   3   3   2   20503     594                                                       13415    9.00    4.57  1.0000
   3   3   2   21642     600                                                       14376    9.00    4.57  1.0000
   3   3  -2   22246     610                                                       14893    8.99    4.57  1.0000
   4   3  -2   14162     836                                                       26217   -2.79   13.33  1.0000
  -4   3   2   13651     982                                                       25500    2.80  -13.34  1.0000
   4   3  -2   14251     875                                                       26344   -2.79   13.33  1.0000
   4   3  -2   14296     847                                                       26408   -2.79   13.33  1.0000
  -4   3  -2   13866     920                                                       25792    2.81  -13.33  1.0000
   4  -3   2   15928     930                                                       28337    2.81   13.33  1.0000
   4   3   2   14880     833                                                       27232   -2.80   13.33  1.0000
   4   3   2   14633     901                                                       26881   -2.80   13.33  1.0000
   4   3   2   14300     860                                                       26406   -2.80   13.33  1.0000
   4  -3  -2   16314     941                                                       28894    2.80   13.34  1.0000
   5   3  -2   15544     648                                                       10805   -4.73    0.83  1.0000
   5  -3  -2   15788     685                                                       11102    4.72    0.83  1.0000
  -5   3  -2   15646     703                                                       10893    4.72   -0.85  1.0000
   5   3  -2   16198     639                                                       11352   -4.73    0.83  1.0000
  -5   3   2   15748     696                                                       10982    4.72   -0.83  1.0000
   5   3   2   16328     610                                                       11457   -4.73    0.83  1.0000
   5   3  -2   15622     586                                                       10870   -4.73    0.83  1.0000
   5   3   2   15582     671                                                       10833   -4.73    0.83  1.0000
   5   3   2   15751     582                                                       10974   -4.73    0.83  1.0000
   5  -3   2   15493     693                                                       10850    4.72    0.85  1.0000
  -6   3  -2   25424    1073                                                       23572   -1.25    0.61  1.0000
  -6  -3  -2   26703     875                                                       24812    1.26    0.61  1.0000
   6   3  -2   25945     990                                                       24073    1.27   -0.60  1.0000
   6   3   2   23206     896                                                       21432    1.26   -0.61  1.0000
   6   3   2   24919     970                                                       23080    1.26   -0.61  1.0000
  -6  -3   2   24692     989                                                       22880    1.27    0.60  1.0000
   6  -3  -2   26712    1031                                                       24845   -1.25   -0.60  1.0000
   6   3  -2   26412     873                                                       24523    1.27   -0.60  1.0000
   6  -3   2   24629    1014                                                       22820   -1.25   -0.61  1.0000
  -6   3   2   24786    1094                                                       22975   -1.25    0.60  1.0000
   7   3  -2    1713     437                                                        1938   -0.58    0.43  1.0000
   7  -3  -2    2200     465                                                        2468    0.58    0.43  1.0000
  -7   3  -2    2322     514                                                        2581    0.58   -0.44  1.0000
   7   3   2    1928     496                                                        2165   -0.58    0.44  1.0000
   7   3   2    1662     436                                                        1882   -0.58    0.44  1.0000
  -7   3   2    2265     550                                                        2520    0.58   -0.43  1.0000
  -7  -3   2    2199     466                                                        2469   -0.58   -0.43  1.0000
   7  -3   2    1808     516                                                        2052    0.58    0.44  1.0000
   8   3   2    4502     671                                                        6365    1.29    2.64  1.0000
   8  -3  -2    4080     664                                                        5828   -1.29    2.65  1.0000
   8   3  -2    5098     716                                                        7079    1.30    2.64  1.0000
  -8   3   2    4285     766                                                        6112   -1.29   -2.65  1.0000
  -8   3  -2    4762     783                                                        6673   -1.29   -2.64  1.0000
  -8  -3   2    5262     730                                                        7231    1.30   -2.64  1.0000
   8  -3   2    4972     724                                                        6880   -1.29    2.64  1.0000
  -8  -3  -2    4000     660                                                        5727    1.29   -2.64  1.0000
  -9  -3  -2    7249     838                                                        7846    1.02   -0.63  1.0000
   9  -3   2    6428     810                                                        6990   -1.03    0.63  1.0000
   9   3  -2    6605     789                                                        7176    1.02    0.63  1.0000
  -9   3   2    6863     890                                                        7442   -1.02   -0.62  1.0000
  -9   3  -2    5654     797                                                        6185   -1.03   -0.63  1.0000
   9   3   2    6933     776                                                        7522    1.02    0.63  1.0000
  -9  -3   2    7114     801                                                        7702    1.02   -0.63  1.0000
   9  -3  -2    7372     840                                                        7967   -1.02    0.62  1.0000
 -10   3  -2    3915     833                                                        3645    0.57   -0.97  1.0000
 -10  -3   2    1976     666                                                        1806   -0.56   -0.97  1.0000
  10   3   2    3321     704                                                        3072   -0.57    0.97  1.0000
  10   3  -2    2582     683                                                        2357   -0.56    0.97  1.0000
  10  -3   2    3107     726                                                        2901    0.57    0.97  1.0000
 -10   3   2    3161     779                                                        2908    0.56   -0.99  1.0000
 -10  -3  -2    4042     760                                                        3811   -0.57   -0.97  1.0000
  10  -3  -2    4715     813                                                        4455    0.56    0.99  1.0000
   0  -4  -2    6760     382                                                        6825    4.00    5.60  1.0000
   0   4   2    6652     399                                                        6623    4.00   -5.60  1.0000
   0   4  -2    6359     395                                                        6303    4.00   -5.59  1.0000
   0   4  -2    6651     403                                                        6617    4.00   -5.59  1.0000
   0  -4   2    7068     454                                                        7152    4.00    5.59  1.0000
   0   4   2    7113     515                                                        7118    4.00   -5.60  1.0000
  -1   4   2   12411     707                                                       23514  -10.14    4.86  1.0000
  -1   4  -2   12771     730                                                       24022  -10.15    4.85  1.0000
   1  -4   2   11237     744                                                       22563  -10.15   -4.85  1.0000
   1   4  -2   12985     634                                                       24316  -10.16    4.84  1.0000
  -1  -4   2   12144     738                                                       23860  -10.16   -4.84  1.0000
   1   4   2   11450     728                                                       22152  -10.14    4.86  1.0000
  -1   4   2   11298     813                                                       21934  -10.14    4.86  1.0000
  -1  -4  -2   12655     663                                                       24588  -10.14   -4.86  1.0000
   1   4  -2   12323     762                                                       23386  -10.16    4.84  1.0000
  -1   4  -2   11294     706                                                       21931  -10.15    4.85  1.0000
   1  -4  -2   11732     701                                                       23271  -10.14   -4.86  1.0000
   1   4   2   12780     765                                                       24033  -10.14    4.86  1.0000
   2   4   2   86460    1613                                                       69284   -6.06   -4.17  1.0000
  -2  -4  -2   87974    1449                                                       70484   -6.06    4.17  1.0000
  -2   4  -2   87489    1582                                                       70247   -6.05   -4.16  1.0000
   2   4   2   84346    1536                                                       67391   -6.06   -4.17  1.0000
  -2   4   2   85669    1672                                                       68601   -6.05   -4.16  1.0000
   2   4  -2   85099    1599                                                       68100   -6.05   -4.16  1.0000
   2   4  -2   87951    1437                                                       70656   -6.05   -4.16  1.0000
   2  -4   2   87460    1593                                                       70064   -6.05    4.16  1.0000
  -2  -4   2   84684    1538                                                       67575   -6.05    4.16  1.0000
  -2   4  -2   86021    1474                                                       68931   -6.05   -4.16  1.0000
  -2   4   2   87561    1464                                                       70297   -6.05   -4.16  1.0000
   2  -4  -2   87742    1530                                                       70302   -6.05    4.16  1.0000
   3   4   2  190054    2733                                                      141612   15.73    4.07  1.0000
   3   4   2  192610    2909                                                      143831   15.73    4.07  1.0000
   3   4   2  195509    2885                                                      146351   15.73    4.07  1.0000
   3   4  -2  196659    2911                                                      147385   15.72    4.06  1.0000
  -3   4   2  189408    3017                                                      141053   15.73    4.07  1.0000
   3   4  -2  187908    2763                                                      139783   15.72    4.06  1.0000
   3  -4  -2  193538    2869                                                      145469   15.73   -4.07  1.0000
   3  -4   2  192076    2906                                                      144209   15.72   -4.05  1.0000
  -3   4  -2  194913    2956                                                      145851   15.72    4.05  1.0000
  -3   4  -2  197358    2686                                                      147978   15.72    4.05  1.0000
  -3   4   2  197857    2658                                                      148396   15.73    4.07  1.0000
   4   4  -2   38513    1089                                                       35785    1.36    1.26  1.0000
  -4   4   2   38800    1206                                                       36058    1.35    1.27  1.0000
   4   4  -2   39738    1110                                                       36966    1.36    1.26  1.0000
   4  -4  -2   39149    1123                                                       36362    1.35   -1.27  1.0000
   4  -4  -2   41239     826                                                       38377    1.35   -1.27  1.0000
   4  -4   2   37467    1133                                                       34720    1.36   -1.28  1.0000
   4   4   2   40271    1029                                                       37481    1.36    1.26  1.0000
  -4   4  -2   41080    1191                                                       38235    1.36    1.28  1.0000
   4   4  -2   39573    1034                                                       36807    1.36    1.26  1.0000
   4   4   2   35844    1077                                                       33213    1.36    1.26  1.0000
  -4   4  -2   41285     861                                                       38433    1.36    1.28  1.0000
   4   4   2   40603    1129                                                       37801    1.36    1.26  1.0000
   5   4  -2   10069     773                                                       17566   -6.87    2.11  1.0000
   5   4   2    8896     786                                                       15999   -6.86    2.12  1.0000
   5  -4  -2   11161     870                                                       18912   -6.86   -2.12  1.0000
   5  -4   2   10196     865                                                       17654   -6.87   -2.11  1.0000
   5   4   2   10043     830                                                       17526   -6.86    2.12  1.0000
   5   4  -2   11136     834                                                       18967   -6.87    2.11  1.0000
  -5   4   2    9609     882                                                       16951   -6.86    2.12  1.0000
   5   4  -2   10557     778                                                       18210   -6.87    2.11  1.0000
   5   4   2    9904     740                                                       17342   -6.86    2.12  1.0000
  -5   4  -2   10459     892                                                       18082   -6.87    2.11  1.0000
   6   4   2    7331     728                                                        9414   -2.66   -4.44  1.0000
   6   4  -2    6985     637                                                        9014   -2.66   -4.42  1.0000
  -6  -4  -2    6965     590                                                        8751   -2.66    4.44  1.0000
   6  -4   2    7010     697                                                        8808   -2.66    4.41  1.0000
   6   4  -2    7375     704                                                        9467   -2.66   -4.42  1.0000
   6   4   2    7106     668                                                        9153   -2.66   -4.44  1.0000
   6  -4  -2    6443     665                                                        8158   -2.67    4.43  1.0000
  -6   4  -2    7499     750                                                        9613   -2.66   -4.41  1.0000
  -6   4   2    6995     758                                                        9033   -2.67   -4.43  1.0000
  -7  -4   2    4460     582                                                        4554    0.66    0.51  1.0000
   7   4  -2    5732     625                                                        5814    0.66   -0.51  1.0000
  -7   4  -2    4959     664                                                        5032    0.67   -0.51  1.0000
   7  -4  -2    5190     590                                                        5284    0.67    0.50  1.0000
   7  -4   2    6299     685                                                        6411    0.67    0.51  1.0000
  -7   4   2    5310     710                                                        5380    0.67   -0.50  1.0000
   7   4   2    5629     638                                                        5703    0.68   -0.51  1.0000
   7   4   2    4957     562                                                        5025    0.68   -0.51  1.0000
  -7  -4  -2    4708     484                                                        4799    0.68    0.51  1.0000
  -8   4  -2    6968     845                                                        7763   -1.77    0.57  1.0000
   8  -4  -2    8065     796                                                        8910   -1.77   -0.56  1.0000
  -8   4   2    7868     897                                                        8708   -1.77    0.56  1.0000
  -8  -4   2    8080     775                                                        8927   -1.76   -0.56  1.0000
   8  -4   2    7911     781                                                        8754   -1.77   -0.57  1.0000
   8   4  -2    7708     777                                                        8540   -1.76    0.56  1.0000
   8   4   2    7972     730                                                        8816   -1.77    0.56  1.0000
   9  -4   2    5230     735                                                        4639   -2.39   -1.83  1.0000
  -9  -4   2    4922     696                                                        4344   -2.40   -1.84  1.0000
  -9   4  -2    5527     808                                                        5053   -2.39    1.83  1.0000
   9   4   2    6618     750                                                        6122   -2.39    1.84  1.0000
  -9   4   2    5568     776                                                        5101   -2.39    1.84  1.0000
   9  -4  -2    6162     765                                                        5541   -2.39   -1.84  1.0000
  -9  -4  -2    5932     731                                                        5318   -2.39   -1.84  1.0000
   9   4  -2    6429     750                                                        5932   -2.40    1.84  1.0000
 -10   4   2    4261     914                                                        4457   -0.14    1.86  1.0000
  10   4   2    3634     730                                                        3806   -0.15    1.85  1.0000
  10  -4  -2    3873     789                                                        3884   -0.14   -1.86  1.0000
 -10  -4   2    4155     762                                                        4167   -0.15   -1.86  1.0000
 -10  -4  -2    4601     803                                                        4615   -0.15   -1.85  1.0000
  10  -4   2    4025     812                                                        4042   -0.14   -1.87  1.0000
  10   4  -2    4355     794                                                        4552   -0.15    1.86  1.0000
 -10   4  -2    3350     839                                                        3521   -0.14    1.87  1.0000
  -1   5  -2   10040     557                                                        9596    0.48   -0.55  1.0000
   1   5  -2    9653     522                                                        9212   -0.49    0.54  1.0000
   1   5   2    9616     545                                                        9183   -0.48    0.55  1.0000
   1   5   2    9513     525                                                        9082   -0.48    0.55  1.0000
   1  -5   2   10113     532                                                        9590    0.48    0.55  1.0000
  -1   5  -2   10535     497                                                       10080    0.48   -0.55  1.0000
  -1   5   2   11304     526                                                       10828    0.49   -0.54  1.0000
  -1  -5  -2   10102     462                                                        9581   -0.48   -0.55  1.0000
  -1  -5   2    9864     531                                                        9345   -0.49   -0.54  1.0000
   1   5  -2   10409     443                                                        9951   -0.49    0.54  1.0000
   1  -5  -2    9829     492                                                        9311    0.49    0.54  1.0000
  -1   5   2    9622     609                                                        9183    0.49   -0.54  1.0000
   2   5   2   41281    1470                                                       56834   -2.27   -7.85  1.0000
   2  -5   2   40517    1441                                                       55767    2.30   -7.84  1.0000
   2   5   2   41604    1388                                                       57213   -2.27   -7.85  1.0000
  -2   5   2   38791    1313                                                       53897    2.28    7.84  1.0000
  -2  -5   2   41455    1392                                                       56833   -2.25    7.85  1.0000
  -2   5   2   40427    1515                                                       55825    2.28    7.84  1.0000
  -2  -5  -2   40797    1285                                                       56086   -2.27    7.85  1.0000
  -2   5  -2   41508    1432                                                       57108    2.30    7.84  1.0000
   2   5  -2   41905    1270                                                       57542   -2.25   -7.85  1.0000
   2  -5  -2   40488    1363                                                       55719    2.28   -7.84  1.0000
   2   5  -2   40076    1453                                                       55393   -2.25   -7.85  1.0000
  -2   5  -2   43535    1356                                                       59484    2.30    7.84  1.0000
   3   5   2   33505    1085                                                       32615    2.00    1.22  1.0000
  -3   5  -2   35547    1124                                                       34643   -1.99   -1.21  1.0000
   3   5   2   35754    1039                                                       34838    2.00    1.22  1.0000
  -3   5   2   35102    1192                                                       34221   -1.99   -1.20  1.0000
  -3   5  -2   35508     931                                                       34604   -1.99   -1.21  1.0000
   3  -5   2   33673    1071                                                       32796   -1.99    1.21  1.0000
  -3   5   2   35194     918                                                       34312   -1.99   -1.20  1.0000
   3   5  -2   36056     948                                                       35146    1.99    1.21  1.0000
  -3  -5  -2   36145     963                                                       35230    2.00   -1.22  1.0000
   3   5  -2   35897    1116                                                       34989    1.99    1.21  1.0000
   3  -5  -2   35336    1056                                                       34458   -1.99    1.20  1.0000
  -3  -5   2   35566    1047                                                       34667    1.99   -1.21  1.0000
   4   5   2   18058     926                                                       23663    4.60    5.52  1.0000
  -4   5   2   17220    1050                                                       22686   -4.60   -5.53  1.0000
   4  -5   2   19874     988                                                       25312   -4.59    5.51  1.0000
   4   5   2   16517     949                                                       21865    4.60    5.52  1.0000
   4   5  -2   18074     842                                                       23704    4.61    5.51  1.0000
   4   5  -2   19531     927                                                       25395    4.61    5.51  1.0000
   4   5   2   18751     858                                                       24468    4.60    5.52  1.0000
   4  -5  -2   18966     949                                                       24274   -4.60    5.53  1.0000
   4  -5  -2   18554     687                                                       23800   -4.60    5.53  1.0000
   4   5  -2   19338     953                                                       25171    4.61    5.51  1.0000
  -4   5  -2   17298     982                                                       22771   -4.59   -5.51  1.0000
  -4   5  -2   19005     737                                                       24756   -4.59   -5.51  1.0000
   5   5   2    5648     621                                                        8369   -5.55    2.93  1.0000
   5   5  -2    5125     607                                                        7705   -5.55    2.92  1.0000
   5  -5   2    3920     606                                                        6340    5.55    2.92  1.0000
   5   5  -2    5444     597                                                        8112   -5.55    2.92  1.0000
   5   5   2    4629     527                                                        7065   -5.55    2.93  1.0000
   5  -5  -2    5121     629                                                        7927    5.56    2.91  1.0000
   5   5   2    4851     592                                                        7351   -5.55    2.93  1.0000
  -5   5   2    4636     713                                                        7081    5.56   -2.91  1.0000
  -5   5  -2    5156     667                                                        7741    5.55   -2.92  1.0000
   5   5  -2    5318     570                                                        7952   -5.55    2.92  1.0000
   6  -5   2     746     452                                                        1397    5.32   -1.64  1.0000
   6   5  -2     557     417                                                        1228   -5.31   -1.63  1.0000
   6   5   2    1010     401                                                        2072   -5.32   -1.64  1.0000
   6   5  -2     623     385                                                        1364   -5.31   -1.63  1.0000
   6   5  -2     663     433                                                        1442   -5.31   -1.63  1.0000
   6   5   2     707     429                                                        1533   -5.32   -1.64  1.0000
   6   5   2     663     416                                                        1450   -5.32   -1.64  1.0000
   6  -5  -2     475     415                                                         839    5.32   -1.63  1.0000
  -6   5   2     369     464                                                         776    5.32    1.63  1.0000
  -6   5  -2     660     502                                                        1441    5.32    1.64  1.0000
   7   5  -2   29955    1145                                                       28857   -0.82   -2.12  1.0000
  -7   5  -2   30845    1351                                                       29740    0.81    2.10  1.0000
  -7   5   2   30618    1391                                                       29508    0.82    2.12  1.0000
   7  -5   2   28430    1205                                                       27262    0.81   -2.10  1.0000
   7   5  -2   28522    1182                                                       27449   -0.82   -2.12  1.0000
   7   5   2   27173    1088                                                       26126   -0.81   -2.11  1.0000
  -7  -5   2   26786    1142                                                       25641   -0.82    2.12  1.0000
   7   5   2   29902    1195                                                       28807   -0.81   -2.11  1.0000
   7  -5  -2   25745    1155                                                       24620    0.82   -2.12  1.0000
  -7  -5  -2   31482    1163                                                       30250   -0.81    2.11  1.0000
   8   5   2   11911     881                                                       13449    0.73    1.34  1.0000
  -8  -5   2    9100     815                                                       10455    0.75   -1.33  1.0000
   8   5  -2   10347     909                                                       11789    0.75    1.33  1.0000
  -8   5   2   10015    1008                                                       11435   -0.73   -1.34  1.0000
   8  -5  -2   10087     869                                                       11512   -0.73    1.34  1.0000
   8   5   2   10896     921                                                       12370    0.73    1.34  1.0000
  -8   5  -2   11456    1024                                                       12962   -0.72   -1.34  1.0000
   8  -5   2    8570     885                                                        9879   -0.72    1.34  1.0000
   9   5  -2    4403     748                                                        4264    0.41    0.69  1.0000
   9  -5   2    3993     726                                                        3830   -0.41    0.68  1.0000
  -9  -5  -2    4582     703                                                        4402    0.41   -0.69  1.0000
   9  -5  -2    4523     713                                                        4351   -0.41    0.68  1.0000
  -9   5   2    3397     807                                                        3277   -0.41   -0.68  1.0000
  -9   5  -2    4037     790                                                        3906   -0.41   -0.68  1.0000
  -9  -5   2    4429     678                                                        4254    0.41   -0.69  1.0000
 -10  -5  -2    2828     705                                                        2890   -0.12   -0.04  1.0000
 -10  -5   2    1928     682                                                        1975   -0.11   -0.05  1.0000
  10  -5  -2    1587     663                                                        1634    0.12    0.06  1.0000
  10   5  -2    2650     731                                                        2704   -0.11    0.05  1.0000
 -10   5  -2     965     753                                                        1001    0.12   -0.04  1.0000
  10  -5   2    1148     699                                                        1188    0.12    0.04  1.0000
 -10   5   2     823     771                                                         856    0.12   -0.06  1.0000
   0  -6  -2    6982     412                                                        5550    4.25   -3.67  1.0000
   0   6  -2    7121     475                                                        5897    4.26    3.68  1.0000
   0   6   2    5692     419                                                        4544    4.25    3.67  1.0000
   0   6   2    6436     465                                                        5249    4.25    3.67  1.0000
   0   6  -2    6524     412                                                        5329    4.26    3.68  1.0000
   0  -6   2    7746     467                                                        6260    4.26   -3.68  1.0000
   1   6  -2    8057     658                                                       11242    1.46    4.80  1.0000
   1   6   2    8691     620                                                       11995    1.48    4.81  1.0000
  -1  -6   2    8872     639                                                       12165    1.46   -4.80  1.0000
   1  -6  -2    8192     586                                                       11353    1.49   -4.81  1.0000
  -1   6  -2    7529     621                                                       10609    1.47    4.81  1.0000
  -1   6  -2    9660     627                                                       13146    1.47    4.81  1.0000
  -1  -6  -2    8754     561                                                       12023    1.48   -4.81  1.0000
  -1   6   2    8344     619                                                       11581    1.49    4.81  1.0000
   1   6  -2    8260     534                                                       11485    1.46    4.80  1.0000
   1   6   2    8882     656                                                       12222    1.48    4.81  1.0000
   1  -6   2    9172     674                                                       12522    1.47   -4.81  1.0000
  -1   6   2    8751     718                                                       12065    1.49    4.81  1.0000
   2   6  -2   29495    1150                                                       34659    3.84   -1.38  1.0000
   2   6   2   29489    1054                                                       34650    3.84   -1.39  1.0000
   2  -6   2   27022    1070                                                       32297    3.84    1.38  1.0000
  -2   6   2   28172    1009                                                       33210    3.84   -1.40  1.0000
   2   6  -2   29033     927                                                       34157    3.84   -1.38  1.0000
  -2  -6  -2   27638     964                                                       32973    3.84    1.39  1.0000
  -2  -6   2   29099    1072                                                       34571    3.84    1.38  1.0000
  -2   6  -2   29211    1112                                                       34348    3.84   -1.38  1.0000
  -2   6  -2   28982    1024                                                       34099    3.84   -1.38  1.0000
   2  -6  -2   27874    1025                                                       33224    3.84    1.40  1.0000
  -2   6   2   28866    1200                                                       33965    3.84   -1.40  1.0000
   2   6   2   27680    1117                                                       32683    3.84   -1.39  1.0000
   3   6   2   14693    1017                                                       25372    5.89   -7.65  1.0000
  -3   6  -2   15739     862                                                       26747    5.86   -7.65  1.0000
   3   6  -2   14939    1012                                                       25705    5.87   -7.65  1.0000
  -3  -6   2   13608     907                                                       23931    5.87    7.65  1.0000
   3   6  -2   13849     802                                                       24253    5.87   -7.65  1.0000
  -3   6   2   14313    1083                                                       24870    5.89   -7.65  1.0000
  -3   6   2   13537     822                                                       23832    5.89   -7.65  1.0000
  -3   6  -2   14240     998                                                       24760    5.86   -7.65  1.0000
   3   6   2   14489     910                                                       25101    5.89   -7.65  1.0000
  -3  -6  -2   13992     839                                                       24439    5.89    7.65  1.0000
   3  -6  -2   13568     916                                                       23875    5.89    7.65  1.0000
   3  -6   2   14591     995                                                       25229    5.86    7.65  1.0000
  -4   6   2   62746    1684                                                       51138    5.02    2.09  1.0000
  -4  -6  -2   63474    1373                                                       51798    5.02   -2.08  1.0000
   4  -6  -2   62231    1499                                                       50682    5.02   -2.09  1.0000
  -4  -6   2   63203    1469                                                       51547    5.02   -2.09  1.0000
  -4   6  -2   65467    1305                                                       53578    5.02    2.11  1.0000
   4   6   2   64650    1576                                                       52854    5.02    2.08  1.0000
   4   6  -2   66676    1384                                                       54680    5.02    2.09  1.0000
   4   6  -2   65992    1591                                                       54061    5.02    2.09  1.0000
   4  -6   2   64508    1558                                                       52724    5.02   -2.11  1.0000
   4   6   2   64723    1463                                                       52920    5.02    2.08  1.0000
  -4   6  -2   65458    1613                                                       53570    5.02    2.11  1.0000
   5   6  -2    5521     665                                                        8737   -1.28    4.18  1.0000
   5   6   2    5306     669                                                        8458   -1.26    4.18  1.0000
  -5   6   2    4815     769                                                        7840   -1.28    4.18  1.0000
   5  -6  -2    4300     611                                                        7170   -1.28   -4.18  1.0000
   5   6  -2    4943     576                                                        8005   -1.28    4.18  1.0000
   5  -6   2    3170     585                                                        5682   -1.28   -4.17  1.0000
   5   6   2    4570     604                                                        7521   -1.26    4.18  1.0000
   5   6  -2    4028     594                                                        6826   -1.28    4.18  1.0000
   5   6   2    3979     543                                                        6755   -1.26    4.18  1.0000
  -5   6  -2    4157     697                                                        6991   -1.28    4.17  1.0000
   6   6   2    3541     481                                                        2334   -0.28    2.97  1.0000
  -6   6  -2    4189     588                                                        2867   -0.28    2.98  1.0000
   6  -6  -2    3573     473                                                        2336   -0.29   -2.96  1.0000
   6  -6   2    4142     505                                                        2804   -0.28   -2.98  1.0000
   6   6   2    4097     484                                                        2793   -0.28    2.97  1.0000
   6   6  -2    3575     495                                                        2361   -0.28    2.97  1.0000
   6   6   2    4297     509                                                        2960   -0.28    2.97  1.0000
   6   6  -2    3861     483                                                        2596   -0.28    2.97  1.0000
  -6   6   2    4426     662                                                        3065   -0.29    2.96  1.0000
   6   6  -2    4286     526                                                        2950   -0.28    2.97  1.0000
   7   6  -2   26084    1173                                                       25848    0.70   -1.26  1.0000
  -7   6  -2   25057    1302                                                       24819    0.71   -1.26  1.0000
   7   6  -2   25680    1153                                                       25445    0.70   -1.26  1.0000
  -7  -6  -2   23839    1110                                                       23397    0.71    1.26  1.0000
   7   6   2   25273    1151                                                       25026    0.71   -1.26  1.0000
   7  -6   2   26672    1236                                                       26216    0.71    1.26  1.0000
   7   6  -2   26528    1138                                                       26290    0.70   -1.26  1.0000
   7  -6  -2   22628    1123                                                       22195    0.71    1.25  1.0000
  -7   6   2   23290    1341                                                       23047    0.71   -1.25  1.0000
   7   6   2   25218    1108                                                       24971    0.71   -1.26  1.0000
   8  -6  -2    1104     561                                                        1852    2.14    0.91  1.0000
  -8   6  -2    1670     683                                                        2501    2.15   -0.87  1.0000
   8   6  -2    1839     609                                                        2712    2.16   -0.89  1.0000
  -8   6   2    1733     748                                                        2575    2.14   -0.91  1.0000
  -8  -6   2    1472     527                                                        2329    2.16    0.89  1.0000
   8   6   2    2057     650                                                        2974    2.15   -0.89  1.0000
   8  -6   2    1473     606                                                        2326    2.15    0.87  1.0000
  -9   6   2    1002     761                                                        1217   -0.61    2.10  1.0000
   9  -6  -2    1892     600                                                        2046   -0.61   -2.10  1.0000
   9   6  -2    1749     686                                                        2054   -0.61    2.10  1.0000
  -9   6  -2     713     668                                                         878   -0.62    2.10  1.0000
   9  -6   2    2344     685                                                        2520   -0.62   -2.10  1.0000
   1   7   2   65705    1594                                                       62559   -0.29    1.39  1.0000
  -1   7   2   65818    1680                                                       62699    0.30   -1.38  1.0000
   1   7  -2   63054    1677                                                       59980   -0.30    1.39  1.0000
  -1   7   2   63586    1624                                                       60521    0.30   -1.38  1.0000
  -1  -7  -2   64288    1494                                                       61177   -0.29   -1.39  1.0000
  -1  -7   2   62437    1589                                                       59379   -0.30   -1.39  1.0000
   1   7  -2   66971    1455                                                       63802   -0.30    1.39  1.0000
   1  -7   2   62181    1613                                                       59124    0.29    1.39  1.0000
  -1   7  -2   63544    1632                                                       60453    0.29   -1.39  1.0000
  -1   7  -2   66179    1590                                                       63023    0.29   -1.39  1.0000
   1  -7  -2   63991    1543                                                       60917    0.30    1.38  1.0000
   1   7   2   63154    1694                                                       60070   -0.29    1.39  1.0000
  -2   7  -2   31350    1083                                                       32807   -1.07    0.07  1.0000
   2   7  -2   31589    1187                                                       33092    1.10   -0.06  1.0000
   2  -7   2   31277    1154                                                       32792   -1.07   -0.07  1.0000
  -2   7  -2   29496    1163                                                       30910   -1.07    0.07  1.0000
   2   7   2   31671    1090                                                       33154    1.08   -0.06  1.0000
   2   7   2   32600    1208                                                       34104    1.08   -0.06  1.0000
  -2   7   2   30244    1230                                                       31695   -1.09    0.07  1.0000
  -2   7   2   31944    1102                                                       33435   -1.09    0.07  1.0000
  -2  -7  -2   29798    1007                                                       31295    1.08    0.06  1.0000
   2  -7  -2   31203    1073                                                       32737   -1.09   -0.07  1.0000
   2   7  -2   30966     968                                                       32454    1.10   -0.06  1.0000
  -2  -7   2   30425    1090                                                       31959    1.10    0.06  1.0000
   3   7   2    1358     596                                                        6224    9.02    2.55  1.0000
   3  -7  -2    1271     569                                                        6033   -9.02    2.53  1.0000
   3  -7   2    1044     586                                                        5530   -9.03    2.54  1.0000
  -3  -7   2    1528     557                                                        6576    9.01   -2.55  1.0000
   3   7  -2    1210     470                                                        5895    9.01    2.55  1.0000
  -3   7  -2    1279     661                                                        6054   -9.03   -2.54  1.0000
   3   7   2    1747     550                                                        7028    9.02    2.55  1.0000
  -3  -7  -2    1512     505                                                        6548    9.02   -2.55  1.0000
  -3   7   2    1176     688                                                        5822   -9.02   -2.53  1.0000
   3   7  -2    1433     625                                                        6376    9.01    2.55  1.0000
  -3   7  -2    1608     506                                                        6749   -9.03   -2.54  1.0000
  -3   7   2    1260     500                                                        6009   -9.02   -2.53  1.0000
  -4   7  -2    9999     897                                                       11620   -6.18    1.85  1.0000
   4   7   2   10502     754                                                       12174    6.20   -1.83  1.0000
  -4  -7   2   10390     764                                                       12069    6.22    1.84  1.0000
   4   7  -2    9434     789                                                       10985    6.22   -1.84  1.0000
   4  -7   2    8738     752                                                       10217   -6.18   -1.85  1.0000
  -4   7  -2    9214     629                                                       10741   -6.18    1.85  1.0000
   4  -7  -2   10845     796                                                       12573   -6.21   -1.84  1.0000
   4   7   2    9950     790                                                       11558    6.20   -1.83  1.0000
  -4  -7  -2    9970     684                                                       11593    6.20    1.83  1.0000
   4   7  -2   10019     689                                                       11641    6.22   -1.84  1.0000
  -4   7   2   10718     947                                                       12419   -6.21    1.84  1.0000
   5  -7  -2    1555     496                                                        2602   -0.29    2.89  1.0000
   5   7  -2     574     405                                                        1288    0.28    2.91  1.0000
   5  -7   2    1724     499                                                        2824   -0.29    2.90  1.0000
   5   7   2     808     435                                                        1636    0.30    2.91  1.0000
   5   7   2     963     442                                                        1856    0.30    2.91  1.0000
  -5   7   2     973     616                                                        1865   -0.29   -2.89  1.0000
   5   7  -2     944     442                                                        1826    0.28    2.91  1.0000
  -5   7  -2     391     519                                                         999   -0.29   -2.90  1.0000
  -5  -7   2     814     464                                                        1600    0.28   -2.91  1.0000
  -5  -7  -2     515     384                                                        1161    0.30   -2.91  1.0000
   6  -7  -2   20131    1052                                                       21473    1.23   -0.32  1.0000
  -6  -7   2   21034    1051                                                       22406   -1.24    0.32  1.0000
   6   7  -2   19809    1098                                                       21226   -1.24   -0.32  1.0000
  -6   7   2   20516    1288                                                       21956    1.23    0.32  1.0000
   6   7   2   20678    1127                                                       22140   -1.25   -0.31  1.0000
   6   7   2   21464    1054                                                       22954   -1.25   -0.31  1.0000
   6  -7   2   20632    1136                                                       22006    1.25   -0.33  1.0000
  -6   7  -2   19113    1197                                                       20521    1.25    0.33  1.0000
  -7   7  -2    5283     790                                                        4898    1.78    1.06  1.0000
   7  -7   2    4943     634                                                        4582    1.78   -1.06  1.0000
   7   7  -2    5532     687                                                        5144   -1.80   -1.06  1.0000
   7   7   2    5528     662                                                        5140   -1.79   -1.06  1.0000
  -7   7   2    5662     842                                                        5263    1.80    1.07  1.0000
   7   7  -2    5823     696                                                        5427   -1.80   -1.06  1.0000
   7   7   2    5223     648                                                        4844   -1.79   -1.06  1.0000
   7  -7  -2    4787     668                                                        4429    1.80   -1.07  1.0000
  -8   7   2    1068     756                                                        1578   -0.45   -1.52  1.0000
   8  -7  -2     996     568                                                        1489   -0.45    1.52  1.0000
  -8   7  -2     424     671                                                         763   -0.45   -1.51  1.0000
   8   7   2     239     537                                                         504    0.44    1.51  1.0000
   8  -7   2    2298     639                                                        3020   -0.45    1.51  1.0000
   9   7   2    2109     634                                                        1688    0.91    0.67  1.0000
   9  -7   2    2211     634                                                        1815   -0.90    0.66  1.0000
   9  -7  -2    2305     649                                                        1900   -0.91    0.64  1.0000
  -9   7  -2    1841     792                                                        1451   -0.90   -0.66  1.0000
  -9   7   2     877     800                                                         615   -0.91   -0.64  1.0000
   0  -8  -2    1837     389                                                        2044    5.02   -5.79  1.0000
   0   8   2    2995     494                                                        2459    5.02    5.79  1.0000
   0   8   2    2891     439                                                        2339    5.02    5.79  1.0000
   0   8  -2    2952     449                                                        2416    5.03    5.81  1.0000
   0   8  -2    3035     431                                                        2512    5.03    5.81  1.0000
   0  -8   2    2479     469                                                        2983    5.03   -5.81  1.0000
  -1  -8   2    9787     694                                                        8966    1.77    3.57  1.0000
  -1   8  -2   11176     709                                                       10155    1.76   -3.56  1.0000
   1   8  -2   10516     706                                                        9520    1.77   -3.57  1.0000
  -1   8   2   10525     699                                                        9541    1.78   -3.56  1.0000
  -1   8   2   11167     781                                                       10162    1.78   -3.56  1.0000
  -1   8  -2   11280     725                                                       10255    1.76   -3.56  1.0000
   1   8   2   10317     710                                                        9340    1.78   -3.56  1.0000
  -1  -8  -2   11561     675                                                       10707    1.78    3.56  1.0000
   1  -8   2   12238     767                                                       11350    1.76    3.56  1.0000
   1  -8  -2   10886     713                                                       10049    1.78    3.56  1.0000
   1   8   2   10831     714                                                        9837    1.78   -3.56  1.0000
   1   8  -2   11349     623                                                       10325    1.77   -3.57  1.0000
   2  -8   2   52087    1595                                                       53435   -0.51    4.82  1.0000
  -2   8   2   51283    1683                                                       51909   -0.52   -4.84  1.0000
   2   8  -2   51313    1666                                                       51951   -0.51   -4.82  1.0000
  -2   8  -2   50708    1573                                                       51343   -0.51   -4.82  1.0000
  -2   8   2   51926    1536                                                       52559   -0.52   -4.84  1.0000
  -2   8  -2   51179    1532                                                       51819   -0.51   -4.82  1.0000
   2   8   2   50112    1653                                                       50733   -0.51   -4.83  1.0000
   2   8   2   51173    1487                                                       51805   -0.51   -4.83  1.0000
  -2  -8  -2   52656    1442                                                       54006   -0.51    4.83  1.0000
   2  -8  -2   52156    1514                                                       53492   -0.52    4.84  1.0000
  -2  -8   2   48726    1505                                                       50011   -0.51    4.82  1.0000
   3   8  -2   27130    1150                                                       24766    0.68    1.52  1.0000
   3  -8   2   30441    1151                                                       27954    0.68   -1.53  1.0000
  -3   8   2   29757    1026                                                       27264    0.70    1.52  1.0000
   3  -8  -2   28447    1050                                                       26036    0.70   -1.52  1.0000
  -3  -8   2   27932    1047                                                       25560    0.68   -1.52  1.0000
  -3   8   2   28504    1262                                                       26065    0.70    1.52  1.0000
  -3  -8  -2   28191     979                                                       25785    0.70   -1.52  1.0000
   3   8   2   28783    1013                                                       26325    0.70    1.52  1.0000
  -3   8  -2   27935    1002                                                       25528    0.68    1.53  1.0000
   3   8   2   27070    1137                                                       24688    0.70    1.52  1.0000
  -3   8  -2   26452    1190                                                       24112    0.68    1.53  1.0000
   4   8   2   17574     941                                                       20204   -1.51    2.21  1.0000
   4   8   2   17061    1069                                                       19653   -1.51    2.21  1.0000
  -4   8   2   16322    1144                                                       18855   -1.51    2.21  1.0000
   4   8  -2   17355    1036                                                       19955   -1.50    2.22  1.0000
   4  -8   2   16738    1016                                                       19434   -1.51   -2.22  1.0000
   4  -8  -2   15383     947                                                       17967   -1.51   -2.21  1.0000
  -4   8  -2   17524    1111                                                       20149   -1.51    2.22  1.0000
  -4  -8  -2   16344     875                                                       19010   -1.51   -2.21  1.0000
  -4  -8   2   15527     946                                                       18114   -1.50   -2.22  1.0000
   5   8   2    2070     473                                                         711   -2.05    4.26  1.0000
  -5  -8   2    1577     421                                                         433   -2.07   -4.27  1.0000
  -5   8  -2     451     512                                                         -16   -2.06    4.26  1.0000
   5   8   2    3035     457                                                        1338   -2.05    4.26  1.0000
  -5   8   2     449     598                                                        -123   -2.05    4.26  1.0000
   5  -8   2    1899     459                                                         621   -2.06   -4.26  1.0000
   5  -8  -2    2078     433                                                         729   -2.05   -4.26  1.0000
   5   8  -2    3230     508                                                        1473   -2.07    4.27  1.0000
   6  -8   2   12090     893                                                       11270    2.00   -1.98  1.0000
  -6   8   2   15694    1145                                                       14825    2.00    1.97  1.0000
   6  -8  -2   14275     881                                                       13399    2.00   -1.97  1.0000
   6   8   2   15390     939                                                       14524    2.01    1.98  1.0000
  -6   8  -2   13363    1043                                                       12547    2.00    1.98  1.0000
   6   8   2   13351     955                                                       12535    2.01    1.98  1.0000
  -6  -8   2   14276     904                                                       13404    2.01   -1.98  1.0000
   6   8  -2   13232     932                                                       12426    2.01    1.98  1.0000
   7   8  -2    3023     561                                                        1722    4.72    0.51  1.0000
   7   8   2    1232     482                                                         379    4.73    0.51  1.0000
   7  -8  -2    3225     571                                                        1932    4.74   -0.52  1.0000
  -7  -8   2    2376     510                                                        1248    4.72   -0.51  1.0000
  -7   8  -2    1706     684                                                         708    4.72    0.51  1.0000
   7  -8   2    2972     592                                                        1725    4.72   -0.51  1.0000
  -7   8   2    3215     783                                                        1876    4.74    0.52  1.0000
   7   8   2    1059     510                                                         269    4.73    0.51  1.0000
   8  -8   2     685     554                                                        1369    0.87    2.59  1.0000
   8  -8  -2     115     547                                                         437    0.85    2.60  1.0000
  -8   8   2     312     797                                                         804    0.85   -2.60  1.0000
  -8   8  -2     130     719                                                         469    0.87   -2.59  1.0000
  -8  -8  -2    1047     580                                                        1871    0.86    2.59  1.0000
   1   9   2   14979     906                                                       17409   -5.49    4.15  1.0000
  -1   9  -2   15062     956                                                       17496    5.48   -4.15  1.0000
   1  -9   2   14829     960                                                       17847    5.48    4.15  1.0000
   1   9   2   15426    1008                                                       17903   -5.49    4.15  1.0000
  -1  -9  -2   14337     856                                                       17298   -5.49   -4.15  1.0000
  -1  -9   2   15612     939                                                       18745   -5.50   -4.16  1.0000
  -1   9   2   15277     958                                                       17745    5.49   -4.15  1.0000
   1  -9  -2   14398     899                                                       17373    5.49    4.15  1.0000
   1   9  -2   14503     951                                                       16892   -5.50    4.16  1.0000
  -1   9   2   13386     933                                                       15645    5.49   -4.15  1.0000
   2   9  -2   12742     967                                                       16643    4.85    1.11  1.0000
  -2   9   2   13848    1066                                                       17921   -4.86   -1.11  1.0000
   2  -9   2   13714     985                                                       17566   -4.83    1.10  1.0000
  -2   9   2   14703     961                                                       18900   -4.86   -1.11  1.0000
   2   9   2   15389     936                                                       19665    4.84    1.10  1.0000
   2  -9  -2   13899     905                                                       17796   -4.86    1.11  1.0000
   2   9   2   14723    1063                                                       18906    4.84    1.10  1.0000
  -2  -9   2   12944     922                                                       16696    4.85   -1.11  1.0000
  -2   9  -2   13521    1024                                                       17526   -4.83   -1.10  1.0000
  -2  -9  -2   14234     870                                                       18162    4.84   -1.10  1.0000
  -2   9  -2   14721     954                                                       18899   -4.83   -1.10  1.0000
  -3   9   2   15799     896                                                       16329   -2.27    3.36  1.0000
   3  -9   2   15301     972                                                       16303   -2.27   -3.34  1.0000
  -3  -9   2   16312     931                                                       17336    2.26    3.35  1.0000
   3  -9  -2   17610     971                                                       18696   -2.27   -3.36  1.0000
  -3   9  -2   17342    1120                                                       17925   -2.27    3.34  1.0000
  -3   9   2   17436    1127                                                       18009   -2.27    3.36  1.0000
  -3   9  -2   16751     925                                                       17319   -2.27    3.34  1.0000
   3   9   2   15781    1004                                                       16311    2.27   -3.35  1.0000
   3   9   2   16859     866                                                       17418    2.27   -3.35  1.0000
   3   9  -2   16032    1033                                                       16560    2.26   -3.35  1.0000
  -4  -9   2    2579     506                                                        1862   -0.02   -1.80  1.0000
   4   9   2    1977     496                                                        1361   -0.04    1.79  1.0000
   4  -9   2    2269     533                                                        1602    0.04    1.80  1.0000
  -4   9  -2    1789     625                                                        1205    0.04   -1.80  1.0000
   4   9   2    3362     498                                                        2544   -0.04    1.79  1.0000
   4   9  -2    1342     487                                                         841   -0.02    1.80  1.0000
   4  -9  -2    2459     469                                                        1760    0.02    1.80  1.0000
  -4   9   2    3771     729                                                        2897    0.02   -1.80  1.0000
   5   9  -2    4548     725                                                        5418    1.22   -1.38  1.0000
  -5   9   2    4100     865                                                        4935   -1.24    1.40  1.0000
  -5   9  -2    3412     781                                                        4168   -1.24    1.38  1.0000
   5   9   2    4006     716                                                        4827    1.24   -1.39  1.0000
   5  -9  -2    3702     612                                                        4500   -1.24   -1.40  1.0000
  -5  -9   2    4154     619                                                        4991    1.22    1.38  1.0000
   5  -9   2    4830     705                                                        5733   -1.24   -1.38  1.0000
  -6   9  -2    5743     906                                                        5017    2.45    1.83  1.0000
  -6   9   2    6574     931                                                        5802    2.42    1.83  1.0000
   6   9  -2    5662     747                                                        4932   -2.44   -1.84  1.0000
   6   9   2    4251     691                                                        3602   -2.44   -1.84  1.0000
   6  -9  -2    6847     726                                                        6086    2.42   -1.83  1.0000
   6  -9   2    5759     728                                                        5054    2.45   -1.83  1.0000
  -7   9   2      22     747                                                         -38   -0.03   -1.04  1.0000
   7   9   2      22     472                                                        -113    0.04    1.05  1.0000
  -7   9  -2      22     691                                                        -242   -0.04   -1.05  1.0000
   7   9  -2     699     572                                                         860    0.03    1.05  1.0000
   7  -9   2      75     527                                                         113   -0.04    1.05  1.0000
   7  -9  -2     754     511                                                         901   -0.03    1.04  1.0000
  -8  -9  -2    1062     564                                                         703    0.60   -2.01  1.0000
  -8   9   2    1153     868                                                         732   -0.61   -2.01  1.0000
  -8   9  -2    2014     845                                                        1460   -0.61   -1.99  1.0000
   8  -9  -2    2296     635                                                        1774   -0.61    2.01  1.0000
   8  -9   2    1248     586                                                         860   -0.61    1.99  1.0000
   0 -10   2   23680    1032                                                       19556    4.59    2.92  1.0000
   0  10   2   24140    1102                                                       19983    4.57   -2.93  1.0000
   0  10   2   24159    1011                                                       20000    4.57   -2.93  1.0000
   0  10  -2   23594    1082                                                       19488    4.59   -2.92  1.0000
   0 -10  -2   25622     995                                                       21335    4.57    2.93  1.0000
   1  10   2    4163     622                                                        5413    1.24   -3.06  1.0000
   1 -10   2    4829     670                                                        6374    1.23    3.06  1.0000
  -1  10  -2    3546     621                                                        4690    1.23   -3.06  1.0000
  -1 -10   2    3962     643                                                        5364    1.24    3.06  1.0000
   1 -10  -2    4526     630                                                        6030    1.24    3.07  1.0000
   1  10  -2    4753     682                                                        6089    1.24   -3.06  1.0000
  -1  10   2    3027     672                                                        4085    1.24   -3.07  1.0000
  -1  10   2    2900     579                                                        3935    1.24   -3.07  1.0000
   1  10   2    3721     670                                                        4899    1.24   -3.06  1.0000
   2 -10   2   13676     955                                                       14957   -3.08    2.69  1.0000
  -2  10  -2   12904     910                                                       14027   -3.08   -2.69  1.0000
   2 -10  -2   14950     905                                                       16297   -3.11    2.70  1.0000
  -2  10   2   13732    1011                                                       14895   -3.11   -2.70  1.0000
   2  10   2   14886    1014                                                       16101   -3.10   -2.69  1.0000
  -2  10   2   14579     927                                                       15786   -3.11   -2.70  1.0000
  -2 -10   2   13965     923                                                       15254   -3.09    2.69  1.0000
   2  10  -2   13452    1018                                                       14597   -3.09   -2.69  1.0000
   3  10   2    5324     732                                                        5642    2.37    0.19  1.0000
   3  10  -2    3987     700                                                        4246    2.36    0.19  1.0000
   3 -10   2    5038     680                                                        5310    2.37   -0.19  1.0000
  -3  10   2    4922     775                                                        5223    2.38    0.19  1.0000
  -3  10  -2    3966     575                                                        4222    2.37    0.19  1.0000
   3 -10  -2    4907     637                                                        5177    2.38   -0.19  1.0000
  -3  10   2    6097     648                                                        6444    2.38    0.19  1.0000
  -3 -10   2    5874     654                                                        6179    2.36   -0.19  1.0000
   4 -10  -2    1301     480                                                        1359   -0.28    0.11  1.0000
  -4  10   2     392     669                                                         424   -0.28   -0.11  1.0000
  -4 -10   2    1673     530                                                        1736   -0.26    0.10  1.0000
   4 -10   2     564     508                                                         601   -0.27    0.10  1.0000
   4  10   2     935     523                                                         987   -0.28   -0.10  1.0000
   4  10  -2     829     510                                                         875   -0.26   -0.10  1.0000
  -5  10   2    8506    1074                                                        8975   -4.00    4.15  1.0000
   5 -10  -2    8370     798                                                        9142   -4.00   -4.15  1.0000
  -5  10  -2    8795    1067                                                        9291   -4.01    4.15  1.0000
   5  10   2    7982     899                                                        8421   -4.01    4.15  1.0000
   5 -10   2    6413     806                                                        7013   -4.01   -4.15  1.0000
   5  10  -2    8938     938                                                        9451   -4.02    4.16  1.0000
   6  10  -2    1491     670                                                        1931    2.14   -0.01  1.0000
   6  10   2    1304     663                                                        1709    2.13   -0.01  1.0000
   6 -10  -2    2365     645                                                        2973    2.13    0.01  1.0000
  -6  10  -2    3082     926                                                        3728    2.14   -0.01  1.0000
   6 -10   2    2384     659                                                        2996    2.14    0.01  1.0000
  -6  10   2    1767     916                                                        2247    2.13   -0.01  1.0000
   7  10   2     544     678                                                        1713    3.08   -2.65  1.0000
  -7  10  -2     103     873                                                         789    3.08   -2.65  1.0000
   7  10  -2     294     659                                                        1235    3.08   -2.64  1.0000
  -7  10   2       7     820                                                         398    3.10   -2.64  1.0000
   7 -10   2     481     627                                                        1591    3.08    2.65  1.0000
   7 -10  -2     584     638                                                        1777    3.10    2.64  1.0000
  -1  11   2    2613     566                                                        2860   -1.53   -5.89  1.0000
   1  11   2    2720     614                                                        2995    1.54    5.89  1.0000
   1  11  -2    2174     601                                                        2323    1.53    5.89  1.0000
  -1  11  -2    2620     600                                                        2875   -1.54   -5.89  1.0000
   1 -11   2    2796     606                                                        3378   -1.54    5.89  1.0000
  -1 -11   2    2541     614                                                        3052    1.53   -5.89  1.0000
  -2  11  -2     614     446                                                         509    1.35    1.55  1.0000
   2 -11   2      85     440                                                        -655    1.35   -1.55  1.0000
  -2 -11   2      85     397                                                        -773   -1.35    1.55  1.0000
  -2  11   2      84     445                                                        -348    1.34    1.54  1.0000
   2  11   2      86     442                                                          -7   -1.36   -1.55  1.0000
   2  11  -2     355     439                                                         256   -1.35   -1.55  1.0000
   2 -11  -2     318     456                                                         240    1.34   -1.54  1.0000
   3 -11   2    2974     622                                                        2852   -0.55    1.46  1.0000
  -3  11  -2    2485     582                                                        2567   -0.55   -1.46  1.0000
  -3  11   2    1496     686                                                        1546   -0.54   -1.45  1.0000
   3  11  -2    1718     627                                                        1774    0.54    1.45  1.0000
   3 -11  -2    2762     579                                                        2641   -0.54    1.45  1.0000
   3  11   2    2972     702                                                        3065    0.54    1.45  1.0000
   4  11  -2    4082     773                                                        4015    2.02    0.52  1.0000
   4 -11   2    5187     730                                                        5135   -2.01    0.53  1.0000
   4 -11  -2    6257     710                                                        6210   -2.01    0.53  1.0000
  -4  11   2    5202     869                                                        5135   -2.01   -0.53  1.0000
   4  11   2    5614     820                                                        5547    2.00    0.52  1.0000
   5  11   2    2088     688                                                        2135   -0.48   -1.59  1.0000
  -5  11   2    2277     839                                                        2332    0.49    1.59  1.0000
   5 -11  -2    2484     598                                                        2423    0.49   -1.59  1.0000
   5 -11   2    2862     655                                                        2797    0.48   -1.59  1.0000
   5  11  -2    2084     693                                                        2138   -0.50   -1.59  1.0000
   6  11   2    2806     673                                                        1087   -4.64    0.28  1.0000
   6 -11  -2    3473     607                                                        1596    4.63    0.29  1.0000
   6  11  -2    2677     663                                                        1010   -4.63    0.27  1.0000
  -6  11   2    1796     919                                                         497    4.63   -0.29  1.0000
   6 -11   2    2409     612                                                         892    4.64    0.29  1.0000
   0 -12   2   25059    1277                                                       24707   -0.62   -0.13  1.0000
   0  12  -2   25587    1342                                                       25249   -0.62    0.13  1.0000
   0  12   2   25414    1374                                                       25063   -0.65    0.13  1.0000
   1 -12   2    1275     572                                                        1334   -1.22    0.24  1.0000
  -1  12  -2    1372     591                                                        1441   -1.22   -0.24  1.0000
   1  12  -2    1860     649                                                        1945   -1.22   -0.24  1.0000
  -1  12   2    2005     617                                                        2093   -1.22   -0.24  1.0000
   1  12   2    1625     621                                                        1701   -1.21   -0.24  1.0000
  -2  12   2    5135     702                                                        4602   -0.78    1.36  1.0000
   2  12  -2    4828     795                                                        4304   -0.76    1.36  1.0000
  -2  12  -2    6093     753                                                        5503   -0.76    1.36  1.0000
   2  12   2    6356     801                                                        5763   -0.78    1.36  1.0000
   2 -12   2    7562     768                                                        6957   -0.76   -1.36  1.0000
   3 -12   2    3143     715                                                        4074    2.48    1.15  1.0000
   3  12   2    2069     731                                                        2783    2.48   -1.16  1.0000
   3  12  -2    2339     748                                                        3099    2.47   -1.14  1.0000
   4  12   2    2237     746                                                        2191   -1.03    2.16  1.0000
   4 -12  -2    1252     541                                                        1241   -1.03   -2.16  1.0000
   4  12  -2     767     664                                                         687   -1.01    2.16  1.0000
   4 -12   2    1340     605                                                        1330   -1.02   -2.16  1.0000
   5  12  -2     897     713                                                        1625    0.85    3.79  1.0000
   5  12   2     303     575                                                        -207    0.87    3.78  1.0000
   5 -12   2     527     648                                                        1233    0.87   -3.79  1.0000
   5 -12  -2     228     542                                                         665    0.88   -3.78  1.0000
   1  13  -2    1195     691                                                        1655   -0.37   -1.44  1.0000
   1  13   2    1028     698                                                        1455   -0.36   -1.44  1.0000
  -1  13   2     836     650                                                        1226    0.38    1.44  1.0000
  -1  13  -2    2174     729                                                        2781    0.36    1.44  1.0000
   2 -13   2     124     557                                                         127   -0.12    0.13  1.0000
  -2  13   2    1776     656                                                        1804   -0.12   -0.14  1.0000
   2  13  -2     123     607                                                         131    0.13    0.13  1.0000
  -2  13  -2     909     612                                                         928   -0.12   -0.13  1.0000
   2  13   2     834     619                                                         852    0.12    0.13  1.0000
   3 -13   2    2636     717                                                        3509   -1.99   -0.71  1.0000
   3  13   2    1996     785                                                        2851    2.00   -0.71  1.0000
   3  13  -2    3622     883                                                        4749    1.99   -0.71  1.0000
   1   0  -3  128355    2554                                                      146528   -0.01   -5.47  1.0000
   1   0  -3  127370    2545                                                      145475   -0.01   -5.47  1.0000
   1   0   3  127876    2530                                                      146005    0.00   -5.46  1.0000
  -1   0  -3  123484    2549                                                      141309    0.00    5.46  1.0000
  -1   0   3  125539    2606                                                      143518   -0.01    5.47  1.0000
   1   0   3  131744    2610                                                      150136    0.00   -5.46  1.0000
  -2   0   3     183     121                                                          97    0.02    5.19  1.0000
  -2   0  -3     193      95                                                          91    0.01    5.20  1.0000
   2   0   3     544     123                                                         -45    0.01   -5.20  1.0000
   2   0   3      53     162                                                         268    0.01   -5.20  1.0000
   2   0  -3     258     121                                                          53    0.02   -5.19  1.0000
   2   0  -3     111      95                                                         167    0.02   -5.19  1.0000
  -3   0  -3  203075    2940                                                      166511   -0.01   -9.50  1.0000
   3   0   3  202612    3158                                                      166094   -0.01    9.50  1.0000
   3   0  -3  202642    3096                                                      166125   -0.02    9.50  1.0000
   3   0   3  200170    3046                                                      163884   -0.01    9.50  1.0000
  -3   0   3  205293    3180                                                      168524   -0.02   -9.50  1.0000
   3   0  -3  203027    2906                                                      166474   -0.02    9.50  1.0000
   4   0   3    2038     336                                                        2317    0.03   -0.67  1.0000
   4   0  -3    2366     183                                                        2662    0.03   -0.66  1.0000
   4   0  -3    2464     330                                                        2766    0.03   -0.66  1.0000
   4   0   3    2624     309                                                        2940    0.03   -0.67  1.0000
  -4   0  -3    2463     214                                                        2769    0.03    0.67  1.0000
  -4   0   3    2839     350                                                        3163    0.03    0.66  1.0000
   5   0   3   13751     600                                                       11834    0.00   -1.90  1.0000
   5   0  -3   13769     630                                                       11854   -0.01   -1.90  1.0000
   5   0  -3   14199     393                                                       12253   -0.01   -1.90  1.0000
  -5   0  -3   15080     462                                                       13071    0.00    1.90  1.0000
  -5   0  -3   14170     667                                                       12224    0.00    1.90  1.0000
  -5   0   3   15096     693                                                       13089   -0.01    1.90  1.0000
  -6   0  -3   10432     682                                                        8795    0.00   -1.87  1.0000
  -6   0   3    9869     638                                                        8272    0.00   -1.87  1.0000
   6   0   3    9760     598                                                        8179    0.00    1.87  1.0000
   6   0  -3   10134     621                                                        8515    0.00    1.87  1.0000
   7   0  -3    2033     566                                                        4427   -0.01    4.82  1.0000
   7   0   3    2693     570                                                        5377    0.00    4.82  1.0000
  -7   0  -3    2801     586                                                        5525    0.00   -4.82  1.0000
  -7   0   3    2254     590                                                        4746   -0.01   -4.82  1.0000
  -8   0   3   17027    1097                                                       18445    0.01   -1.19  1.0000
  -8   0  -3   17525    1076                                                       18962    0.01   -1.19  1.0000
   8   0   3   18411    1032                                                       19883    0.01    1.19  1.0000
   8   0  -3   17726    1083                                                       19172    0.01    1.19  1.0000
   9   0   3    4377     699                                                        5087    0.00   -1.15  1.0000
   9   0  -3    4688     744                                                        5422   -0.01   -1.15  1.0000
  -9   0  -3    4446     703                                                        5161    0.00    1.15  1.0000
  -9   0   3    6039     816                                                        6869   -0.01    1.15  1.0000
  10   0  -3      13     586                                                         446    0.00   -3.92  1.0000
  10   0   3      10     565                                                         427    0.01   -3.92  1.0000
 -10   0   3     310     498                                                        -780    0.00    3.92  1.0000
 -10   0  -3       0     603                                                         318    0.01    3.92  1.0000
   0  -1  -3 1001314    8534                                                      514523  -52.40  -36.39  1.0000
   0  -1   3  977897    8522                                                      497766  -52.40  -36.40  1.0000
   0   1  -3  977223    8533                                                      501273  -52.40   36.40  1.0000
   0   1   3 1001736    8717                                                      518896  -52.40   36.39  1.0000
   1  -1   3    7449     316                                                       10555   -4.99   -6.75  1.0000
   1   1   3    7047     361                                                       10184   -4.99    6.74  1.0000
   1  -1   3    6661     347                                                        9546   -4.99   -6.75  1.0000
   1  -1  -3    6507     287                                                        9355   -5.00   -6.77  1.0000
   1   1  -3    6111     343                                                        8960   -4.98    6.73  1.0000
   1   1  -3    6843     328                                                        9913   -4.98    6.73  1.0000
  -1   1  -3    6715     310                                                        9755   -4.99    6.75  1.0000
   1  -1  -3    6451     299                                                        9282   -5.00   -6.77  1.0000
  -1  -1  -3    6410     322                                                        9220   -4.99   -6.74  1.0000
  -1   1   3    7695     399                                                       11024   -5.00    6.77  1.0000
   2  -1   3    8415     421                                                       10741   12.18    1.23  1.0000
   2   1  -3    6857     402                                                        9739   12.17   -1.23  1.0000
   2   1   3    6446     403                                                        9146   12.17   -1.23  1.0000
   2  -1  -3    7330     400                                                        9280   12.18    1.23  1.0000
  -2   1   3    7068     454                                                       10049   12.18   -1.23  1.0000
   2   1  -3    6489     360                                                        9208   12.17   -1.23  1.0000
  -2   1  -3    6789     322                                                        9648   12.18   -1.23  1.0000
   2   1   3    6595     329                                                        9361   12.17   -1.23  1.0000
   2  -1   3    7521     415                                                        9539   12.18    1.23  1.0000
  -2  -1  -3    7376     357                                                        9335   12.17    1.23  1.0000
  -2  -1   3    7811     372                                                        9926   12.17    1.23  1.0000
  -3  -1  -3  180646    3777                                                      216562    3.85    8.84  1.0000
   3   1   3  178097    3950                                                      213796    3.85   -8.84  1.0000
   3  -1  -3  173124    3861                                                      208277    3.86    8.83  1.0000
  -3   1   3  177999    4000                                                      213651    3.86   -8.83  1.0000
   3   1   3  173808    3783                                                      209091    3.85   -8.84  1.0000
  -3   1  -3  179143    3683                                                      214931    3.87   -8.83  1.0000
  -3  -1   3  179030    3931                                                      214789    3.86    8.84  1.0000
   3  -1   3  173222    3852                                                      208410    3.87    8.83  1.0000
   3   1  -3  180442    3752                                                      216363    3.86   -8.84  1.0000
   3   1  -3  175144    3859                                                      210554    3.86   -8.84  1.0000
  -3   1  -3  179280    3984                                                      215081    3.87   -8.83  1.0000
   4   1   3   10381     511                                                        9835   -2.47    1.76  1.0000
   4   1   3   11126     582                                                       10567   -2.47    1.76  1.0000
  -4   1   3   10895     576                                                       10348   -2.47    1.77  1.0000
  -4   1  -3   10009     560                                                        9478   -2.47    1.77  1.0000
  -4  -1  -3    9902     427                                                        9509   -2.47   -1.76  1.0000
   4  -1   3    9894     530                                                        9510   -2.47   -1.77  1.0000
   4  -1  -3   10288     546                                                        9899   -2.47   -1.77  1.0000
   4   1  -3    9399     390                                                        8877   -2.46    1.76  1.0000
   4   1  -3   10438     541                                                        9897   -2.46    1.76  1.0000
  -4  -1   3    9615     517                                                        9230   -2.46   -1.76  1.0000
   5   1   3   30365     912                                                       28632    0.99   -0.88  1.0000
   5  -1  -3   28212     952                                                       26440    0.98    0.91  1.0000
  -5  -1  -3   27606     754                                                       25857    0.99    0.88  1.0000
   5   1   3   27071     948                                                       25436    0.99   -0.88  1.0000
  -5  -1   3   27885     951                                                       26120    0.99    0.89  1.0000
   5   1  -3   26631     717                                                       25003    0.99   -0.89  1.0000
   5   1  -3   28722     931                                                       27031    0.99   -0.89  1.0000
  -5   1   3   27225     978                                                       25585    0.98   -0.91  1.0000
   5  -1   3   30889     962                                                       29028    0.98    0.92  1.0000
  -5   1  -3   25700     967                                                       24104    0.98   -0.92  1.0000
   6   1  -3   15604     749                                                       14102    1.69   -1.48  1.0000
   6  -1  -3   15960     785                                                       14222    1.68    1.48  1.0000
  -6  -1  -3   16454     580                                                       14698    1.67    1.49  1.0000
   6  -1   3   16473     782                                                       14716    1.67    1.48  1.0000
  -6  -1   3   14883     774                                                       13201    1.69    1.48  1.0000
  -6   1   3   15324     825                                                       13838    1.68   -1.48  1.0000
  -6   1  -3   16376     793                                                       14849    1.67   -1.48  1.0000
   6   1   3   16891     754                                                       15342    1.67   -1.49  1.0000
  -7  -1   3    2105     464                                                        1774    0.85    0.13  1.0000
   7   1  -3    2862     459                                                        2479    0.85   -0.13  1.0000
   7  -1  -3    2536     453                                                        2172    0.85    0.12  1.0000
  -7   1  -3    2302     455                                                        1959    0.85   -0.13  1.0000
  -7  -1  -3    3213     504                                                        2801    0.85    0.12  1.0000
  -7   1   3    2494     506                                                        2138    0.85   -0.12  1.0000
   7   1   3    2488     452                                                        2132    0.85   -0.12  1.0000
   7  -1   3    2680     472                                                        2304    0.85    0.13  1.0000
  -8   1  -3   19110    1058                                                       17599   -1.40    2.55  1.0000
   8  -1  -3   20467    1063                                                       18681   -1.40   -2.56  1.0000
   8   1   3   21895    1030                                                       20280   -1.41    2.54  1.0000
  -8  -1   3   22224    1104                                                       20363   -1.40   -2.53  1.0000
   8  -1   3   20220     988                                                       18438   -1.40   -2.55  1.0000
  -8   1   3   23130    1180                                                       21487   -1.40    2.56  1.0000
   8   1  -3   21190    1077                                                       19606   -1.40    2.53  1.0000
  -8  -1  -3   22201    1139                                                       20333   -1.41   -2.54  1.0000
   9  -1  -3    5088     756                                                        5720    0.13   -1.08  1.0000
  -9   1  -3    5514     755                                                        6164    0.13    1.07  1.0000
   9   1  -3    4652     727                                                        5256    0.14    1.08  1.0000
  -9   1   3    6784     859                                                        7510    0.13    1.08  1.0000
   9   1   3    5148     710                                                        5783    0.14    1.08  1.0000
  -9  -1   3    5608     736                                                        6272    0.14   -1.08  1.0000
  -9  -1  -3    6125     809                                                        6818    0.14   -1.08  1.0000
   9  -1   3    5492     695                                                        6143    0.13   -1.07  1.0000
 -10  -1   3    4481     789                                                        4756   -1.98   -1.79  1.0000
  10   1   3    3569     718                                                        3821   -1.99    1.79  1.0000
 -10  -1  -3    3092     700                                                        3295   -1.99   -1.79  1.0000
 -10   1  -3    4201     810                                                        4492   -2.00    1.81  1.0000
  10  -1   3    3448     728                                                        3675   -2.00   -1.81  1.0000
  10   1  -3    2880     720                                                        3094   -1.98    1.79  1.0000
  10  -1  -3    3115     742                                                        3326   -1.99   -1.81  1.0000
 -10   1   3    2687     749                                                        2894   -1.99    1.81  1.0000
   1  -2  -3  437568    5402                                                      318989   26.13   -4.42  1.0000
   1   2  -3  441035    5502                                                      322123  -26.15   -4.39  1.0000
  -1   2  -3  437721    5518                                                      319245   26.12    4.42  1.0000
   1  -2   3  430276    5481                                                      312758   26.12   -4.42  1.0000
   1  -2  -3  441085    5425                                                      322013   26.13   -4.42  1.0000
   1   2   3  427931    5573                                                      310866  -26.14   -4.39  1.0000
  -1  -2   3  431537    5478                                                      313869  -26.15    4.39  1.0000
  -1   2   3  441912    5648                                                      322817   26.13    4.42  1.0000
  -1   2  -3  432646    5440                                                      314885   26.12    4.42  1.0000
  -1  -2  -3  437995    5488                                                      319416  -26.14    4.39  1.0000
  -2   2  -3  205669    2633                                                      148305   14.46   -8.27  1.0000
   2   2   3  195815    2591                                                      139951  -14.43    8.29  1.0000
   2  -2  -3  204530    2595                                                      147454   14.47    8.29  1.0000
   2  -2   3  204427    2761                                                      147418   14.46    8.27  1.0000
  -2   2   3  206943    2868                                                      149338   14.47   -8.29  1.0000
   2   2   3  201755    2783                                                      144993  -14.43    8.29  1.0000
   2  -2  -3  203881    2710                                                      146901   14.47    8.29  1.0000
   2   2  -3  204868    2726                                                      147624  -14.43    8.29  1.0000
  -2  -2  -3  204248    2735                                                      147282  -14.43   -8.29  1.0000
   2   2  -3  211025    2685                                                      152871  -14.43    8.29  1.0000
  -2   2  -3  207759    2782                                                      150085   14.46   -8.27  1.0000
   2   2  -3  201866    2738                                                      145071  -14.43    8.29  1.0000
   3   2  -3  103097    1756                                                       87755    6.72    2.07  1.0000
  -3  -2  -3  104446    1774                                                       88469    6.72   -2.08  1.0000
   3   2  -3   98135    1791                                                       83172    6.72    2.07  1.0000
  -3   2  -3  100486    1861                                                       85321   -6.75   -2.06  1.0000
   3   2   3   99722    1839                                                       84625    6.72    2.08  1.0000
  -3   2   3  101158    1920                                                       85939   -6.75   -2.07  1.0000
   3  -2  -3  101525    1810                                                       85763   -6.75    2.07  1.0000
  -3   2  -3  103849    1618                                                       88428   -6.75   -2.06  1.0000
  -3  -2   3  103664    1788                                                       87761    6.72   -2.07  1.0000
   3  -2   3  103539    1837                                                       87620   -6.75    2.06  1.0000
   3   2   3  100013    1702                                                       84893    6.72    2.08  1.0000
   4   2  -3   12652     569                                                       10639    3.70   -2.75  1.0000
   4   2   3   12644     494                                                       10627    3.70   -2.76  1.0000
   4   2   3   11710     575                                                        9760    3.70   -2.76  1.0000
   4   2  -3   11826     454                                                        9872    3.70   -2.75  1.0000
  -4   2  -3   12147     579                                                       10165   -3.67    2.75  1.0000
   4  -2  -3   13096     584                                                       11089   -3.67   -2.75  1.0000
  -4  -2  -3   11684     471                                                        9772    3.70    2.76  1.0000
  -4   2   3   11687     575                                                        9741   -3.67    2.75  1.0000
   4  -2   3   11507     544                                                        9607   -3.67   -2.75  1.0000
  -4  -2   3   12049     512                                                       10116    3.70    2.75  1.0000
   5   2  -3   56853    1389                                                       51245   -1.69   -3.51  1.0000
  -5   2   3   57431    1497                                                       51821    1.67    3.54  1.0000
  -5  -2   3   53267    1362                                                       48318   -1.69    3.51  1.0000
   5  -2   3   56101    1398                                                       51050    1.67   -3.54  1.0000
   5  -2  -3   54443    1385                                                       49471    1.67   -3.54  1.0000
  -5  -2  -3   54758    1235                                                       49745   -1.69    3.51  1.0000
   5   2  -3   53247    1206                                                       47819   -1.69   -3.51  1.0000
   5   2   3   55969    1302                                                       50408   -1.69   -3.51  1.0000
   5   2   3   54536    1388                                                       49046   -1.69   -3.51  1.0000
  -5   2  -3   54638    1438                                                       49161    1.67    3.54  1.0000
   6   2   3   26993     990                                                       27306   -1.07   -1.89  1.0000
  -6  -2   3   26963    1055                                                       26983   -1.07    1.89  1.0000
   6  -2  -3   28336    1087                                                       28370    1.08   -1.88  1.0000
   6  -2   3   29149    1088                                                       29179    1.08   -1.89  1.0000
  -6  -2  -3   28054     883                                                       28083   -1.07    1.89  1.0000
  -6   2  -3   27092    1110                                                       27405    1.08    1.89  1.0000
   6   2   3   26469    1065                                                       26778   -1.07   -1.89  1.0000
  -6   2   3   27482    1156                                                       27802    1.08    1.88  1.0000
   6   2  -3   28878     872                                                       29198   -1.07   -1.89  1.0000
   6   2  -3   28903    1052                                                       29223   -1.07   -1.89  1.0000
  -7   2   3    9481     790                                                        9515    0.61   -0.40  1.0000
  -7   2  -3   10931     824                                                       10965    0.61   -0.40  1.0000
  -7  -2   3   11168     772                                                       11204   -0.63   -0.42  1.0000
   7  -2  -3   11851     773                                                       11888    0.61    0.40  1.0000
   7   2  -3   11020     790                                                       11058   -0.63    0.42  1.0000
   7   2   3   11376     748                                                       11419   -0.63    0.42  1.0000
   7  -2   3   11599     757                                                       11632    0.61    0.40  1.0000
   8   2  -3   15003     973                                                       14792    0.73   -0.68  1.0000
  -8  -2   3   16514     989                                                       16348    0.73    0.68  1.0000
  -8   2   3   15449    1051                                                       15235   -0.71    0.67  1.0000
   8   2   3   15361     927                                                       15146    0.72   -0.68  1.0000
   8  -2   3   15957     974                                                       15793   -0.72   -0.68  1.0000
   8  -2  -3   13118     927                                                       12967   -0.71   -0.67  1.0000
  -8  -2  -3   14398     987                                                       14240    0.72    0.68  1.0000
  -8   2  -3   16819    1071                                                       16597   -0.72    0.68  1.0000
  -9  -2   3    5478     731                                                        5520   -1.17    0.39  1.0000
   9  -2   3    4928     711                                                        4961    1.15   -0.39  1.0000
  -9   2   3    4547     759                                                        4622    1.15    0.39  1.0000
  -9   2  -3    5771     810                                                        5857    1.15    0.39  1.0000
   9   2  -3    5350     751                                                        5438   -1.17   -0.39  1.0000
   9   2   3    4539     672                                                        4620   -1.17   -0.39  1.0000
  -9  -2  -3    5172     752                                                        5214   -1.17    0.39  1.0000
   9  -2  -3    6397     738                                                        6442    1.15   -0.39  1.0000
  10   2  -3    2498     719                                                        3245   -1.96   -2.35  1.0000
 -10   2  -3    2176     745                                                        2865    1.97    2.35  1.0000
  10  -2  -3    3741     794                                                        4681    1.97   -2.35  1.0000
 -10  -2   3    2763     742                                                        3562   -1.96    2.35  1.0000
  10   2   3    3339     742                                                        4212   -1.96   -2.35  1.0000
 -10   2   3    1453     727                                                        1995    1.97    2.35  1.0000
  10  -2   3    3623     757                                                        4549    1.97   -2.35  1.0000
 -10  -2  -3    4154     828                                                        5149   -1.96    2.35  1.0000
   0   3   3  249762    7135                                                      415572    4.21   32.96  1.0000
   0  -3   3  242172    7128                                                      405766    4.23  -32.97  1.0000
   0   3   3  244784    7282                                                      409131    4.21   32.96  1.0000
   0   3  -3  256132    7155                                                      423816    4.23   32.97  1.0000
   0  -3  -3  253696    6994                                                      420649    4.21  -32.96  1.0000
  -1   3   3  202527    5167                                                      283731   16.90    7.52  1.0000
   1   3  -3  202422    4924                                                      283574   16.90    7.50  1.0000
  -1   3  -3  208480    4994                                                      290766   16.90    7.51  1.0000
   1   3  -3  204833    5041                                                      286426   16.90    7.50  1.0000
   1  -3   3  197137    5012                                                      276844   16.90   -7.51  1.0000
   1  -3  -3  202713    4905                                                      283449   16.90   -7.52  1.0000
   1   3   3  202310    5089                                                      283445   16.89    7.50  1.0000
  -1  -3   3  204668    5012                                                      285732   16.90   -7.50  1.0000
  -1  -3  -3  208210    4852                                                      289918   16.89   -7.50  1.0000
   1   3   3  205880    5045                                                      287669   16.89    7.50  1.0000
  -1   3  -3  198166    4999                                                      278560   16.90    7.51  1.0000
   2  -3  -3   15818     523                                                       18470    7.35   15.59  1.0000
   2   3   3   13764     644                                                       16580    7.35  -15.59  1.0000
   2   3  -3   14245     639                                                       17236    7.35  -15.58  1.0000
   2  -3   3   14484     638                                                       16718    7.35   15.59  1.0000
   2   3  -3   14850     648                                                       18051    7.35  -15.58  1.0000
   2  -3  -3   15461     609                                                       18003    7.35   15.59  1.0000
   2   3  -3   13819     504                                                       16659    7.35  -15.58  1.0000
  -2   3   3   14067     704                                                       17000    7.35  -15.59  1.0000
   2   3   3   14606     515                                                       17719    7.35  -15.59  1.0000
   2   3   3   14328     639                                                       17344    7.35  -15.59  1.0000
  -2   3  -3   15138     613                                                       18442    7.35  -15.59  1.0000
  -2   3  -3   15483     566                                                       18902    7.35  -15.59  1.0000
   3   3   3  145286    3328                                                      173605   -6.76   -5.85  1.0000
   3   3  -3  146714    3269                                                      175152   -6.76   -5.85  1.0000
   3   3  -3  139004    3252                                                      166709   -6.76   -5.85  1.0000
   3   3   3  144064    3281                                                      172268   -6.76   -5.85  1.0000
  -3   3  -3  143451    3346                                                      171584   -6.75   -5.87  1.0000
   3  -3   3  144298    3306                                                      171737   -6.75    5.87  1.0000
   3   3   3  142616    3118                                                      170682   -6.76   -5.85  1.0000
  -3   3   3  145711    3447                                                      174076   -6.76   -5.86  1.0000
   3  -3  -3  147446    3031                                                      175194   -6.76    5.86  1.0000
   3  -3  -3  138251    3240                                                      165144   -6.76    5.86  1.0000
  -3   3  -3  148737    3087                                                      177367   -6.75   -5.87  1.0000
   3   3  -3  143325    3195                                                      171443   -6.76   -5.85  1.0000
   4   3  -3    2513     399                                                        5403   -3.57    6.75  1.0000
  -4   3   3    3513     553                                                        6947   -3.59    6.75  1.0000
   4   3  -3    3138     459                                                        6380   -3.57    6.75  1.0000
   4  -3   3    2803     480                                                        5851   -3.58   -6.75  1.0000
   4   3  -3    3057     453                                                        6256   -3.57    6.75  1.0000
  -4   3  -3    3013     298                                                        6187   -3.58    6.75  1.0000
   4   3   3    2669     456                                                        5647   -3.58    6.74  1.0000
   4   3   3    2586     424                                                        5514   -3.58    6.74  1.0000
   4  -3  -3    2709     453                                                        5704   -3.59   -6.75  1.0000
  -4   3  -3    2477     454                                                        5344   -3.58    6.75  1.0000
  -4  -3  -3    2657     415                                                        5617   -3.58   -6.74  1.0000
   5   3   3   17836     763                                                       14815    2.69    0.34  1.0000
  -5  -3  -3   15834     640                                                       13136    2.69   -0.34  1.0000
   5   3   3   17440     653                                                       14454    2.69    0.34  1.0000
   5  -3   3   17402     740                                                       14567    2.69   -0.32  1.0000
   5   3  -3   17266     660                                                       14298    2.69    0.33  1.0000
  -5   3  -3   16923     776                                                       13985    2.69    0.32  1.0000
  -5   3   3   16069     802                                                       13215    2.69    0.32  1.0000
   5  -3  -3   16561     740                                                       13803    2.69   -0.32  1.0000
  -5  -3   3   16323     676                                                       13584    2.69   -0.33  1.0000
   5   3  -3   17367     702                                                       14390    2.69    0.33  1.0000
   6   3  -3   16019     687                                                       15258    1.47    0.65  1.0000
   6  -3   3   13896     781                                                       13288    1.47   -0.65  1.0000
   6   3   3   13894     816                                                       13179    1.46    0.64  1.0000
   6   3  -3   15346     808                                                       14600    1.47    0.65  1.0000
   6  -3  -3   13329     754                                                       12737    1.47   -0.65  1.0000
   6   3   3   14659     714                                                       13926    1.46    0.64  1.0000
  -6   3   3   14764     855                                                       14032    1.47    0.65  1.0000
  -6  -3  -3   14585     681                                                       13963    1.46   -0.64  1.0000
  -6  -3   3   13728     756                                                       13127    1.47   -0.65  1.0000
  -6   3  -3   13948     834                                                       13231    1.47    0.65  1.0000
   7  -3  -3   10806     755                                                       11248    0.48    0.00  1.0000
  -7  -3   3    9243     727                                                        9652    0.48   -0.01  1.0000
  -7   3   3    8934     807                                                        9342    0.48    0.00  1.0000
   7   3  -3   10978     809                                                       11430    0.48    0.01  1.0000
   7  -3   3    9810     754                                                       10236    0.48    0.01  1.0000
   7   3   3   10291     719                                                       10735    0.48    0.01  1.0000
   7   3   3   10338     794                                                       10783    0.48    0.01  1.0000
  -7   3  -3   10025     810                                                       10461    0.48   -0.01  1.0000
   8  -3  -3    6891     666                                                        5207    2.17   -1.41  1.0000
  -8  -3  -3    6591     667                                                        4951    2.16   -1.40  1.0000
   8  -3   3    4974     617                                                        3562    2.17   -1.40  1.0000
  -8  -3   3    6318     652                                                        4713    2.16   -1.41  1.0000
  -8   3   3    6531     692                                                        4913    2.17    1.41  1.0000
  -8   3  -3    6938     684                                                        5271    2.17    1.40  1.0000
   8   3  -3    6731     673                                                        5090    2.16    1.41  1.0000
   8   3   3    6503     608                                                        4893    2.16    1.40  1.0000
   9  -3  -3    8056     871                                                        9007    0.48   -1.07  1.0000
   9   3  -3    9490     899                                                       10534    0.48    1.08  1.0000
  -9  -3  -3    7243     861                                                        8153    0.49   -1.08  1.0000
   9  -3   3    8263     872                                                        9230    0.49   -1.07  1.0000
   9   3   3    6875     774                                                        7769    0.49    1.08  1.0000
  -9  -3   3    7594     868                                                        8524    0.48   -1.08  1.0000
  -9   3   3    6376     855                                                        7230    0.48    1.07  1.0000
  -9   3  -3    7132     890                                                        8039    0.49    1.07  1.0000
 -10   3  -3    2776     781                                                        2794   -0.14    0.27  1.0000
  10  -3   3    3265     736                                                        3256   -0.14   -0.27  1.0000
 -10  -3  -3    2335     708                                                        2328   -0.13   -0.26  1.0000
 -10  -3   3    2338     671                                                        2330   -0.14   -0.26  1.0000
 -10   3   3    3305     758                                                        3327   -0.14    0.28  1.0000
  10  -3  -3    3933     789                                                        3924   -0.14   -0.28  1.0000
  10   3  -3    3882     746                                                        3904   -0.14    0.26  1.0000
  10   3   3    2346     670                                                        2362   -0.13    0.26  1.0000
  -1  -4  -3   24472     419                                                       11618  -11.37  -11.07  1.0000
  -1   4   3   20063     481                                                       10817   11.35  -11.04  1.0000
  -1   4  -3   20780     509                                                       11424   11.35  -11.05  1.0000
   1   4   3   22205     565                                                       12622  -11.37   11.07  1.0000
   1   4  -3   20990     393                                                       11592  -11.37   11.06  1.0000
   1   4   3   20106     543                                                       10851  -11.37   11.07  1.0000
   1  -4  -3   23325     456                                                       10771   11.35   11.04  1.0000
   1   4  -3   20157     527                                                       10892  -11.37   11.06  1.0000
  -1   4   3   20136     588                                                       10878   11.35  -11.04  1.0000
  -1  -4   3   24752     542                                                       11827  -11.37  -11.06  1.0000
   1  -4   3   22986     556                                                       10524   11.35   11.05  1.0000
  -1   4  -3   19426     476                                                       10289   11.35  -11.05  1.0000
   2   4  -3  139116    2057                                                      109823    1.87    9.31  1.0000
   2   4   3  136199    2271                                                      107226    1.88    9.30  1.0000
  -2   4   3  134899    2347                                                      106086   -1.85   -9.31  1.0000
   2   4  -3  136348    2262                                                      107364    1.87    9.31  1.0000
   2  -4  -3  137658    2164                                                      108689   -1.85    9.31  1.0000
  -2  -4  -3  140347    2058                                                      111065    1.88   -9.30  1.0000
  -2  -4   3  136799    2218                                                      107917    1.87   -9.31  1.0000
   2   4   3  141394    2243                                                      111843    1.88    9.30  1.0000
   2  -4   3  135161    2247                                                      106463   -1.86    9.31  1.0000
  -2   4   3  138449    2112                                                      109238   -1.85   -9.31  1.0000
  -2   4  -3  133244    2195                                                      104611   -1.86   -9.31  1.0000
  -2   4  -3  135455    2129                                                      106572   -1.86   -9.31  1.0000
   3  -4  -3   22184     820                                                       25233   -8.83   -3.33  1.0000
  -3   4  -3   20590     856                                                       23463   -8.84    3.33  1.0000
   3   4  -3   22462     854                                                       25539    8.81   -3.33  1.0000
   3   4   3   21549     728                                                       24522    8.81   -3.33  1.0000
  -3   4   3   22412     947                                                       25484   -8.83    3.33  1.0000
   3   4  -3   21936     743                                                       24958    8.81   -3.33  1.0000
   3   4   3   20585     833                                                       23453    8.81   -3.33  1.0000
   3  -4  -3   20637     662                                                       23518   -8.83   -3.33  1.0000
  -3   4  -3   22049     720                                                       25080   -8.84    3.33  1.0000
   3  -4   3   22597     881                                                       25686   -8.84   -3.33  1.0000
   3   4   3   20047     854                                                       22855    8.81   -3.33  1.0000
   3   4  -3   21988     863                                                       25015    8.81   -3.33  1.0000
   4  -4  -3   17341     751                                                       17784    0.65   -1.37  1.0000
   4   4   3   17338     762                                                       17643   -0.64   -1.37  1.0000
   4   4  -3   18637     698                                                       18953   -0.64   -1.36  1.0000
   4   4   3   17034     761                                                       17336   -0.64   -1.37  1.0000
  -4   4  -3   17135     557                                                       17435    0.65    1.37  1.0000
  -4   4  -3   16543     781                                                       16837    0.65    1.37  1.0000
   4   4  -3   15878     724                                                       16166   -0.64   -1.36  1.0000
   4   4  -3   17237     738                                                       17539   -0.64   -1.36  1.0000
   4  -4   3   16870     771                                                       17313    0.65   -1.37  1.0000
  -4   4   3   17744     887                                                       18043    0.65    1.37  1.0000
   4   4   3   17564     672                                                       17872   -0.64   -1.37  1.0000
   4  -4  -3   17129     512                                                       17569    0.65   -1.37  1.0000
   5  -4  -3    7927     650                                                        8623   -1.09   -1.04  1.0000
   5   4  -3    7445     601                                                        8105    1.09   -1.02  1.0000
   5   4  -3    8022     645                                                        8707    1.09   -1.02  1.0000
   5   4   3    7867     570                                                        8542    1.08   -1.02  1.0000
  -5   4   3    7577     671                                                        8254   -1.09    1.04  1.0000
  -5  -4  -3    6667     543                                                        7290    1.08    1.02  1.0000
  -5   4  -3    8212     679                                                        8919   -1.10    1.04  1.0000
   5   4  -3    6811     550                                                        7441    1.09   -1.02  1.0000
   5  -4   3    8250     653                                                        8962   -1.10   -1.04  1.0000
   5   4   3    7513     599                                                        8172    1.08   -1.02  1.0000
  -6   4  -3    7430     668                                                        7042   -2.05   -0.48  1.0000
  -6  -4  -3    6682     525                                                        6284    2.04   -0.48  1.0000
   6   4  -3    6510     530                                                        6136    2.06    0.48  1.0000
   6   4   3    7581     633                                                        7187    2.04    0.48  1.0000
   6  -4   3    7380     634                                                        6969   -2.05    0.48  1.0000
  -6  -4   3    7216     570                                                        6802    2.06   -0.48  1.0000
   6   4   3    7303     555                                                        6915    2.04    0.48  1.0000
  -6   4   3    6963     708                                                        6583   -2.04   -0.48  1.0000
   6  -4  -3    7040     611                                                        6635   -2.04    0.48  1.0000
   6   4  -3    6986     604                                                        6601    2.06    0.48  1.0000
  -7  -4  -3    6524     555                                                        6364   -0.07    1.09  1.0000
   7  -4  -3    4820     604                                                        4671    0.06   -1.11  1.0000
   7  -4   3    5832     664                                                        5667    0.05   -1.12  1.0000
   7   4   3    5892     654                                                        5906   -0.07   -1.09  1.0000
  -7  -4   3    6025     592                                                        5868   -0.06    1.10  1.0000
  -7   4   3    6988     780                                                        6998    0.06    1.11  1.0000
   7   4   3    5403     564                                                        5415   -0.07   -1.09  1.0000
  -7   4  -3    5145     662                                                        5147    0.05    1.12  1.0000
   7   4  -3    5405     584                                                        5415   -0.06   -1.10  1.0000
   8   4   3    2015     510                                                        2104   -0.17    0.28  1.0000
  -8   4   3    1059     599                                                        1123    0.17   -0.27  1.0000
  -8   4  -3    2204     617                                                        2296    0.16   -0.28  1.0000
   8   4   3    2164     588                                                        2256   -0.17    0.28  1.0000
   8  -4   3    1393     510                                                        1463    0.16    0.28  1.0000
   8  -4  -3     976     469                                                        1035    0.17    0.27  1.0000
   8   4  -3    1653     540                                                        1731   -0.16    0.28  1.0000
  -8  -4   3    1812     491                                                        1890   -0.16   -0.28  1.0000
   9   4  -3    3992     696                                                        4398    0.25    0.66  1.0000
   9  -4  -3    2101     634                                                        2398   -0.27    0.65  1.0000
   9   4   3    2802     604                                                        3146    0.25    0.67  1.0000
  -9  -4  -3    1636     585                                                        1903    0.25   -0.67  1.0000
   9  -4   3    2708     663                                                        3044   -0.27    0.65  1.0000
  -9   4  -3    2499     664                                                        2819   -0.27   -0.65  1.0000
  -9  -4   3    2254     578                                                        2563    0.25   -0.66  1.0000
  -9   4   3    3586     776                                                        3968   -0.27   -0.65  1.0000
 -10  -4   3    2354     695                                                        2965   -1.12    0.73  1.0000
 -10   4  -3    1328     746                                                        1799    1.12    0.72  1.0000
 -10   4   3     904     736                                                        1301    1.12    0.72  1.0000
  10  -4   3     872     674                                                        1257    1.12   -0.72  1.0000
  10   4  -3    1987     708                                                        2555   -1.12   -0.73  1.0000
 -10  -4  -3    2904     745                                                        3581   -1.13    0.72  1.0000
  10  -4  -3    1523     646                                                        2023    1.12   -0.72  1.0000
   0   5   3    7852     260                                                        1524   11.82    5.75  1.0000
   0   5  -3    6859     243                                                        1032   11.81    5.76  1.0000
   0  -5   3    6413     277                                                         889   11.81   -5.76  1.0000
   0  -5  -3    6023     211                                                         714   11.82   -5.75  1.0000
   0   5  -3    6478     237                                                         858   11.81    5.76  1.0000
   0   5   3    6064     299                                                         681   11.82    5.75  1.0000
   1   5  -3    8106     423                                                        5374    0.81   -6.47  1.0000
  -1   5   3    8731     501                                                        5903    0.82   -6.47  1.0000
  -1  -5  -3    9181     394                                                        6598    0.81    6.47  1.0000
  -1   5  -3    8337     403                                                        5567    0.82   -6.47  1.0000
   1  -5   3    9163     471                                                        6579    0.82    6.47  1.0000
   1   5   3    8867     443                                                        6023    0.81   -6.47  1.0000
  -1   5   3    8981     439                                                        6118    0.82   -6.47  1.0000
   1   5   3    9394     491                                                        6476    0.81   -6.47  1.0000
  -1  -5   3    7874     427                                                        5450    0.81    6.47  1.0000
   1   5  -3    9031     354                                                        6165    0.81   -6.47  1.0000
   1  -5  -3    8403     399                                                        5909    0.82    6.47  1.0000
  -1   5  -3    8964     431                                                        6104    0.82   -6.47  1.0000
  -2   5  -3   21884     558                                                       12134   -4.28   -7.97  1.0000
   2   5   3   21640     632                                                       11950   -4.28   -7.98  1.0000
   2   5   3   22055     601                                                       12261   -4.28   -7.98  1.0000
   2  -5  -3   21425     570                                                       12168   -4.28    7.98  1.0000
  -2   5   3   22087     771                                                       12285   -4.28   -7.98  1.0000
   2  -5   3   22114     678                                                       12694   -4.28    7.97  1.0000
  -2  -5   3   20337     597                                                       11343   -4.28    7.97  1.0000
  -2   5  -3   21962     595                                                       12192   -4.28   -7.97  1.0000
  -2   5   3   21239     550                                                       11650   -4.28   -7.98  1.0000
  -2  -5  -3   21733     498                                                       12403   -4.28    7.98  1.0000
   2   5  -3   23439     483                                                       13307   -4.28   -7.97  1.0000
   2   5  -3   20489     601                                                       11094   -4.28   -7.97  1.0000
   3  -5  -3    8622     686                                                       14871   -5.86   -2.89  1.0000
  -3  -5  -3    8070     575                                                       14145   -5.85   -2.91  1.0000
   3  -5  -3    7999     540                                                       14049   -5.86   -2.89  1.0000
   3  -5   3    7475     727                                                       13351   -5.86   -2.89  1.0000
   3   5  -3    8329     723                                                       14512   -5.85    2.90  1.0000
  -3   5  -3    8692     714                                                       14985   -5.86    2.89  1.0000
  -3   5   3    9553     856                                                       16110   -5.86    2.89  1.0000
   3   5  -3    8607     579                                                       14879   -5.85    2.90  1.0000
  -3  -5   3    7720     672                                                       13683   -5.85   -2.90  1.0000
   3   5   3    8325     727                                                       14503   -5.85    2.91  1.0000
  -3   5  -3    9025     598                                                       15422   -5.86    2.89  1.0000
   3   5   3    7920     678                                                       13967   -5.85    2.91  1.0000
  -4   5  -3  127640    2238                                                      114578    0.50    5.28  1.0000
   4   5  -3  125298    2524                                                      112348    0.50    5.28  1.0000
   4  -5   3  125907    2543                                                      113595    0.50   -5.28  1.0000
   4  -5  -3  120651    2454                                                      108610    0.50   -5.27  1.0000
   4   5   3  129073    2504                                                      115921    0.51    5.28  1.0000
   4  -5  -3  127007    2188                                                      114651    0.50   -5.27  1.0000
  -4   5   3  124312    2681                                                      111435    0.50    5.27  1.0000
   4   5  -3  121627    2326                                                      108870    0.50    5.28  1.0000
   4   5   3  126548    2321                                                      113526    0.51    5.28  1.0000
  -4   5  -3  129447    2598                                                      116292    0.50    5.28  1.0000
   4   5   3  129892    2565                                                      116698    0.51    5.28  1.0000
   4   5  -3  123758    2445                                                      110889    0.50    5.28  1.0000
  -5   5   3    8430     794                                                       10548   -1.98    1.42  1.0000
  -5   5  -3    8894     761                                                       11062   -1.97    1.43  1.0000
   5   5  -3    8359     684                                                       10471   -1.98    1.43  1.0000
   5  -5   3    8735     766                                                       10880   -1.97   -1.43  1.0000
   5  -5  -3    9152     744                                                       11349   -1.98   -1.42  1.0000
   5   5   3    7573     700                                                        9586   -1.97    1.43  1.0000
   5   5  -3    8588     664                                                       10727   -1.98    1.43  1.0000
   5   5   3    9018     712                                                       11204   -1.97    1.43  1.0000
   5   5  -3    8736     733                                                       10893   -1.98    1.43  1.0000
   5   5   3    7994     635                                                       10060   -1.97    1.43  1.0000
  -6   5  -3     211     416                                                         461    1.11    1.08  1.0000
   6   5  -3      48     334                                                         -43    1.11    1.08  1.0000
   6   5  -3       1     369                                                          35    1.11    1.08  1.0000
  -6  -5  -3      51     301                                                         195    1.11   -1.07  1.0000
   6   5   3     256     363                                                         526    1.11    1.07  1.0000
   6   5  -3      67     328                                                         229    1.11    1.08  1.0000
   6   5   3     162     389                                                         386    1.11    1.07  1.0000
   6  -5   3       4     365                                                          77    1.11   -1.08  1.0000
  -6   5   3      48     374                                                        -762    1.11    1.08  1.0000
   6  -5  -3      48     348                                                        -243    1.11   -1.08  1.0000
   7   5  -3   22056    1071                                                       21202    0.50    0.41  1.0000
   7   5  -3   20550    1004                                                       19726    0.50    0.41  1.0000
  -7  -5   3   22460    1014                                                       21600    0.50   -0.41  1.0000
   7   5   3   23648    1022                                                       22752    0.51    0.41  1.0000
  -7   5  -3   22765    1175                                                       21895    0.50    0.41  1.0000
   7  -5  -3   23387    1110                                                       22515    0.50   -0.40  1.0000
   7  -5   3   21774    1075                                                       20925    0.50   -0.41  1.0000
   7   5   3   23188    1085                                                       22301    0.51    0.41  1.0000
  -7  -5  -3   22140     987                                                       21275    0.51   -0.41  1.0000
  -7   5   3   22884    1205                                                       22021    0.50    0.40  1.0000
   8   5   3    5335     683                                                        4759    1.90   -2.15  1.0000
   8   5  -3    4961     664                                                        4399    1.88   -2.14  1.0000
   8  -5  -3    4525     656                                                        4098    1.89    2.14  1.0000
   8  -5   3    3623     666                                                        3226    1.89    2.14  1.0000
  -8   5   3    3811     763                                                        3303    1.89   -2.14  1.0000
   8   5   3    5582     636                                                        4996    1.90   -2.15  1.0000
  -8  -5   3    4330     584                                                        3909    1.88    2.14  1.0000
  -8   5  -3    5038     717                                                        4473    1.89   -2.14  1.0000
   9   5  -3    5819     767                                                        5447    0.71   -1.14  1.0000
  -9  -5   3    4780     687                                                        4521    0.71    1.14  1.0000
  -9   5  -3    3229     743                                                        2945    0.72   -1.15  1.0000
  -9  -5  -3    5285     723                                                        5019    0.72    1.14  1.0000
  -9   5   3    5287     896                                                        4928    0.72   -1.16  1.0000
   9  -5  -3    5558     750                                                        5279    0.72    1.16  1.0000
   9  -5   3    4645     755                                                        4390    0.72    1.15  1.0000
 -10   5  -3    2947     815                                                        2703   -0.47    0.32  1.0000
  10   5  -3    2055     704                                                        1850   -0.47    0.32  1.0000
 -10   5   3    1676     756                                                        1491   -0.47    0.32  1.0000
  10  -5   3    3791     806                                                        3502   -0.47   -0.32  1.0000
 -10  -5  -3    1189     630                                                        1028   -0.47   -0.32  1.0000
 -10  -5   3    1499     656                                                        1318   -0.47   -0.32  1.0000
  10  -5  -3    1786     646                                                        1588   -0.47   -0.32  1.0000
   1  -6  -3   40031     828                                                       25897    2.12    8.53  1.0000
  -1   6   3   40024     921                                                       25980    2.12   -8.53  1.0000
  -1   6  -3   41262     897                                                       26977    2.12   -8.53  1.0000
   1   6  -3   39918     970                                                       25884   -2.13    8.53  1.0000
  -1   6  -3   38387     906                                                       24661    2.12   -8.53  1.0000
   1  -6   3   41071     969                                                       26732    2.12    8.53  1.0000
   1   6  -3   41994     770                                                       27562   -2.13    8.53  1.0000
  -1  -6   3   40902     938                                                       26588   -2.13   -8.53  1.0000
  -1   6   3   38412    1000                                                       24684    2.12   -8.53  1.0000
   1   6   3   41611     993                                                       27243   -2.14    8.53  1.0000
   1   6   3   41542     930                                                       27187   -2.14    8.53  1.0000
  -1  -6  -3   40827     795                                                       26520   -2.14   -8.53  1.0000
  -2   6   3     579     411                                                         872    1.95    1.17  1.0000
   2  -6  -3     244     287                                                         448    1.95   -1.17  1.0000
  -2   6   3     429     263                                                         674    1.95    1.17  1.0000
   2   6   3     420     296                                                         659   -1.95   -1.19  1.0000
   2   6   3     318     297                                                         518   -1.95   -1.19  1.0000
   2   6  -3      59     262                                                          43   -1.94   -1.18  1.0000
  -2  -6  -3     321     232                                                         559   -1.95    1.19  1.0000
  -2  -6   3     513     295                                                         825   -1.94    1.18  1.0000
   2   6  -3     287     224                                                         475   -1.94   -1.18  1.0000
  -2   6  -3     415     248                                                         656    1.95    1.16  1.0000
   2  -6   3      63     314                                                         116    1.95   -1.16  1.0000
  -2   6  -3     196     327                                                         341    1.95    1.16  1.0000
  -3   6   3    6143     750                                                        9933   -2.54    4.02  1.0000
  -3   6   3    5923     551                                                        9653   -2.54    4.02  1.0000
  -3   6  -3    5798     552                                                        9489   -2.53    4.02  1.0000
   3   6  -3    6028     515                                                        9785    2.53   -4.03  1.0000
  -3  -6   3    6106     634                                                        9885    2.53    4.03  1.0000
   3   6   3    5769     680                                                        9452    2.52   -4.03  1.0000
  -3  -6  -3    5271     524                                                        8812    2.52    4.03  1.0000
   3  -6   3    5901     693                                                        9623   -2.53   -4.02  1.0000
   3   6  -3    5273     652                                                        8816    2.53   -4.03  1.0000
   3  -6  -3    5890     617                                                        9613   -2.54   -4.02  1.0000
   3   6   3    5503     656                                                        9110    2.52   -4.03  1.0000
  -3   6  -3    5912     664                                                        9635   -2.53    4.02  1.0000
  -4   6   3   16788    1010                                                       16138   -0.82   -2.74  1.0000
   4  -6  -3   17363     832                                                       16647   -0.82    2.74  1.0000
   4   6  -3   18160     747                                                       17501    0.82    2.74  1.0000
  -4  -6  -3   18991     748                                                       18254    0.81   -2.73  1.0000
   4  -6   3   18140     909                                                       17410   -0.82    2.75  1.0000
   4   6  -3   18716     894                                                       18050    0.82    2.74  1.0000
  -4  -6   3   19517     859                                                       18779    0.82   -2.74  1.0000
  -4   6  -3   18185     702                                                       17514   -0.82   -2.75  1.0000
   4   6   3   16753     886                                                       16108    0.81    2.73  1.0000
  -4   6  -3   17924     928                                                       17256   -0.82   -2.75  1.0000
   4   6   3   17865     823                                                       17204    0.81    2.73  1.0000
   5  -6  -3    3525     534                                                        4253   -1.88    1.17  1.0000
  -5   6  -3    4149     611                                                        4941   -1.87   -1.17  1.0000
   5  -6   3    3506     559                                                        4232   -1.87    1.17  1.0000
   5   6   3    2536     470                                                        3150    1.86    1.18  1.0000
  -5   6   3    4173     687                                                        4967   -1.88   -1.17  1.0000
   5   6  -3    2804     446                                                        3450    1.87    1.17  1.0000
   5   6  -3    3647     526                                                        4388    1.87    1.17  1.0000
   5   6  -3    4277     557                                                        5082    1.87    1.17  1.0000
   5   6   3    2271     446                                                        2850    1.86    1.18  1.0000
   5   6   3    2984     502                                                        3653    1.86    1.18  1.0000
   6  -6  -3    5153     607                                                        5057   -0.54   -0.97  1.0000
   6   6  -3    5802     573                                                        5754    0.56   -0.98  1.0000
   6  -6   3    5633     650                                                        5527   -0.54   -0.95  1.0000
  -6   6   3    6073     764                                                        6035   -0.54    0.97  1.0000
   6   6   3    4663     538                                                        4625    0.55   -0.98  1.0000
   6   6  -3    6112     629                                                        6064    0.56   -0.98  1.0000
   6   6  -3    7212     648                                                        7162    0.56   -0.98  1.0000
  -6   6  -3    4990     668                                                        4947   -0.54    0.95  1.0000
   6   6   3    5931     613                                                        5891    0.55   -0.98  1.0000
  -7  -6   3   35264    1365                                                       37781   -0.81   -1.25  1.0000
  -7  -6  -3   38295    1433                                                       40912   -0.81   -1.24  1.0000
   7  -6   3   35170    1480                                                       37669    0.81    1.24  1.0000
  -7   6   3   35342    1667                                                       37842    0.80   -1.23  1.0000
   7   6   3   34492    1424                                                       36988   -0.81    1.24  1.0000
   7  -6  -3   34857    1466                                                       37329    0.80    1.23  1.0000
  -7   6  -3   34932    1572                                                       37433    0.81   -1.24  1.0000
   7   6  -3   34033    1419                                                       36517   -0.81    1.25  1.0000
   7   6  -3   35077    1428                                                       37598   -0.81    1.25  1.0000
   8  -6  -3    3839     658                                                        4127   -1.05   -0.65  1.0000
  -8   6   3    4717     860                                                        5048   -1.05    0.65  1.0000
   8   6   3    3063     656                                                        3331    1.06   -0.65  1.0000
  -8   6  -3    3878     749                                                        4174   -1.04    0.64  1.0000
  -8  -6   3    4558     632                                                        4882    1.06    0.65  1.0000
   8  -6   3    5458     760                                                        5803   -1.04   -0.64  1.0000
   8   6  -3    4644     713                                                        4980    1.06   -0.65  1.0000
   9  -6   3    5419     828                                                        5261   -1.11    0.64  1.0000
   9   6   3    5640     795                                                        5489    1.11    0.65  1.0000
   9   6  -3    4675     762                                                        4535    1.11    0.65  1.0000
  -9   6   3    4532     933                                                        4402   -1.11   -0.63  1.0000
  -9   6  -3    3299     800                                                        3180   -1.11   -0.64  1.0000
   9  -6  -3    4716     739                                                        4570   -1.11    0.63  1.0000
   0  -7   3   11843     830                                                       16462    4.71    6.47  1.0000
   0   7  -3   12217     698                                                       16844    4.71   -6.47  1.0000
   0   7   3   13324     872                                                       18179    4.72   -6.47  1.0000
   0   7  -3   11047     787                                                       15418    4.71   -6.47  1.0000
   0  -7  -3   13071     728                                                       17950    4.72    6.47  1.0000
   0   7   3   12654     810                                                       17371    4.72   -6.47  1.0000
   1  -7   3   10550     645                                                        9013   -1.86    0.55  1.0000
   1   7   3   11403     695                                                        9803   -1.86   -0.54  1.0000
  -1   7  -3    9741     605                                                        8266   -1.86   -0.55  1.0000
  -1  -7  -3   10460     576                                                        8929   -1.86    0.54  1.0000
   1   7  -3   10492     635                                                        8956   -1.86   -0.54  1.0000
  -1   7   3   12637     759                                                       10949   -1.86   -0.55  1.0000
   1   7  -3   10711     533                                                        9159   -1.86   -0.54  1.0000
   1  -7  -3   11636     616                                                       10018   -1.86    0.55  1.0000
  -1   7  -3   11855     655                                                       10223   -1.86   -0.55  1.0000
   1   7   3   10378     633                                                        8854   -1.86   -0.54  1.0000
  -1  -7   3   10913     664                                                        9345   -1.86    0.54  1.0000
  -1   7   3   10607     641                                                        9065   -1.86   -0.55  1.0000
  -2   7   3   74958    1653                                                       65553   -4.10    0.75  1.0000
   2  -7   3   75836    1753                                                       66177   -4.10   -0.75  1.0000
  -2   7   3   76688    1850                                                       67172   -4.10    0.75  1.0000
   2   7  -3   74611    1799                                                       65222   -4.10    0.75  1.0000
   2   7   3   69718    1632                                                       60657   -4.10    0.74  1.0000
  -2   7  -3   71892    1697                                                       62674   -4.10    0.75  1.0000
  -2   7  -3   75236    1675                                                       65800   -4.10    0.75  1.0000
   2   7  -3   72501    1467                                                       63250   -4.10    0.75  1.0000
   2  -7  -3   72361    1596                                                       62946   -4.10   -0.75  1.0000
  -2  -7   3   73019    1681                                                       63554   -4.10   -0.75  1.0000
   2   7   3   70986    1775                                                       61840   -4.10    0.74  1.0000
  -2  -7  -3   74271    1528                                                       64730   -4.10   -0.74  1.0000
   3  -7  -3    7935     686                                                       10687    1.36    3.65  1.0000
  -3  -7   3    8771     718                                                       11659    1.35    3.64  1.0000
   3  -7   3    7962     726                                                       10718    1.35    3.64  1.0000
  -3   7   3    8253     863                                                       11049    1.36   -3.65  1.0000
  -3   7   3    8439     651                                                       11266    1.36   -3.65  1.0000
   3   7  -3    7826     757                                                       10552    1.35   -3.64  1.0000
  -3  -7  -3    9216     652                                                       12168    1.36    3.64  1.0000
   3   7   3    8648     702                                                       11503    1.36   -3.64  1.0000
  -3   7  -3    9478     800                                                       12467    1.35   -3.64  1.0000
   3   7   3    8048     787                                                       10806    1.36   -3.64  1.0000
   3   7  -3    8210     586                                                       10999    1.35   -3.64  1.0000
  -3   7  -3    8575     630                                                       11423    1.35   -3.64  1.0000
   4  -7   3   21765    1026                                                       22691   -0.02   -3.53  1.0000
  -4   7   3   23421    1209                                                       23640   -0.02    3.52  1.0000
  -4  -7  -3   22376     881                                                       23311   -0.02   -3.53  1.0000
  -4   7  -3   23055     861                                                       23281   -0.02    3.53  1.0000
   4   7  -3   23680    1065                                                       23916   -0.03    3.53  1.0000
   4   7   3   23189    1063                                                       23408   -0.02    3.53  1.0000
   4  -7  -3   21769     988                                                       22684   -0.02   -3.52  1.0000
   4   7   3   21485     958                                                       21686   -0.02    3.53  1.0000
  -4   7  -3   25439    1115                                                       25689   -0.02    3.53  1.0000
  -4  -7   3   22197     992                                                       23138   -0.03   -3.53  1.0000
  -5   7  -3    2619     583                                                        3012    1.09   -0.52  1.0000
   5  -7  -3    2275     506                                                        2642    1.10    0.52  1.0000
  -5  -7   3    2006     470                                                        2351    1.09    0.53  1.0000
   5   7   3    1937     495                                                        2275    1.09   -0.52  1.0000
  -5   7   3    1932     655                                                        2271    1.10   -0.52  1.0000
   5   7   3    1986     493                                                        2328    1.09   -0.52  1.0000
   5  -7   3    2456     528                                                        2836    1.09    0.52  1.0000
   5   7  -3    2141     502                                                        2498    1.09   -0.53  1.0000
  -6   7  -3    9173     859                                                        9480   -4.12    0.12  1.0000
   6  -7   3    8546     795                                                        8832   -4.12   -0.12  1.0000
   6  -7  -3   10011     783                                                       10349   -4.12   -0.11  1.0000
  -6  -7   3    9417     768                                                        9741   -4.12   -0.11  1.0000
   6   7  -3    9826     788                                                       10162   -4.12    0.11  1.0000
   6   7   3    8420     786                                                        8709   -4.13    0.10  1.0000
  -6   7   3    9343     926                                                        9656   -4.12    0.11  1.0000
   6   7   3    8719     742                                                        9019   -4.13    0.10  1.0000
   7   7  -3    8805     822                                                        8933   -0.13   -0.76  1.0000
   7  -7  -3    8500     799                                                        8539   -0.12    0.77  1.0000
   7   7   3    8339     786                                                        8457   -0.12   -0.77  1.0000
  -7   7  -3    7174     860                                                        7285   -0.13   -0.75  1.0000
   7  -7   3    7683     787                                                        7724   -0.13    0.75  1.0000
   7   7  -3    7378     760                                                        7494   -0.13   -0.76  1.0000
  -7  -7  -3    6713     741                                                        6747   -0.12    0.77  1.0000
  -7   7   3    7900     960                                                        8015   -0.12   -0.77  1.0000
   8  -7   3    5244     719                                                        5285    0.03   -0.34  1.0000
  -8   7   3    4407     887                                                        4463    0.04    0.34  1.0000
   8   7  -3    5636     734                                                        5695    0.04    0.33  1.0000
  -8   7  -3    4278     818                                                        4329    0.03    0.34  1.0000
   8   7   3    5076     761                                                        5133    0.04    0.32  1.0000
   8  -7  -3    4561     662                                                        4604    0.04   -0.34  1.0000
  -9   7   3     281     805                                                         532    1.49   -0.04  1.0000
   9  -7  -3     521     594                                                         871    1.49    0.04  1.0000
  -9   7  -3     677     738                                                        1045    1.49   -0.04  1.0000
   9  -7   3    1072     636                                                        1553    1.49    0.04  1.0000
   9   7   3     624     625                                                         981    1.49   -0.01  1.0000
  -1   8  -3    8026     590                                                        6509   -1.04   -1.80  1.0000
  -1  -8   3    7410     574                                                        5936    1.04   -1.81  1.0000
   1  -8  -3    7620     526                                                        6124   -1.04    1.81  1.0000
   1   8   3    6224     571                                                        4893    1.03    1.81  1.0000
   1   8   3    6913     615                                                        5507    1.03    1.81  1.0000
  -1   8   3    7137     546                                                        5708   -1.04   -1.81  1.0000
  -1   8  -3    7949     569                                                        6440   -1.04   -1.80  1.0000
   1  -8   3    7487     603                                                        6009   -1.04    1.80  1.0000
  -1   8   3    7428     662                                                        5968   -1.04   -1.81  1.0000
   1   8  -3    6290     553                                                        4953    1.04    1.81  1.0000
  -1  -8  -3    7069     509                                                        5631    1.03   -1.81  1.0000
   2  -8  -3   33179    1080                                                       30456    1.56    0.97  1.0000
  -2  -8  -3   31354    1001                                                       28719   -1.55   -0.94  1.0000
   2   8   3   31948    1102                                                       29412   -1.55    0.94  1.0000
  -2  -8   3   31872    1124                                                       29214   -1.55   -0.95  1.0000
  -2   8   3   29467    1236                                                       27027    1.56   -0.97  1.0000
   2   8  -3   32344    1196                                                       29794   -1.55    0.95  1.0000
  -2   8   3   32228    1124                                                       29675    1.56   -0.97  1.0000
  -2   8  -3   31440    1098                                                       28910    1.56   -0.97  1.0000
  -2   8  -3   31819    1154                                                       29274    1.56   -0.97  1.0000
   2  -8   3   30430    1128                                                       27816    1.56    0.97  1.0000
   2   8   3   31354    1226                                                       28842   -1.55    0.94  1.0000
   3   8   3    5265     568                                                        5924   -3.65    0.30  1.0000
   3  -8   3    4681     627                                                        5348    3.66    0.30  1.0000
  -3   8  -3    5369     679                                                        6036    3.66   -0.30  1.0000
  -3   8   3    4966     739                                                        5598    3.65   -0.30  1.0000
  -3   8  -3    4635     525                                                        5238    3.66   -0.30  1.0000
   3   8  -3    5113     615                                                        5762   -3.66    0.30  1.0000
   3   8   3    4505     609                                                        5096   -3.65    0.30  1.0000
  -3  -8   3    4465     561                                                        5114   -3.66   -0.30  1.0000
  -3   8   3    4724     543                                                        5335    3.65   -0.30  1.0000
   3  -8  -3    5004     560                                                        5702    3.65    0.30  1.0000
   4  -8  -3    5957     592                                                        5429   -1.17    0.90  1.0000
  -4  -8   3    5901     584                                                        5380    1.18   -0.89  1.0000
   4   8  -3    4313     571                                                        3870    1.18    0.89  1.0000
  -4   8   3    6239     806                                                        5706   -1.17   -0.90  1.0000
   4   8   3    4606     607                                                        4153    1.18    0.88  1.0000
  -4   8  -3    4999     700                                                        4518   -1.16   -0.90  1.0000
   4   8   3    5894     585                                                        5384    1.18    0.88  1.0000
   4  -8   3    4530     602                                                        4065   -1.16    0.90  1.0000
   5   8  -3    6868     754                                                        7710   -1.89   -0.82  1.0000
   5  -8  -3    6853     696                                                        7705    1.88   -0.83  1.0000
  -5  -8   3    5959     649                                                        6744   -1.89    0.82  1.0000
  -5   8  -3    6411     836                                                        7230    1.89    0.83  1.0000
   5   8   3    6649     690                                                        7478   -1.89   -0.82  1.0000
  -5   8   3    8533     951                                                        9485    1.88    0.83  1.0000
   5  -8   3    6588     735                                                        7422    1.89   -0.83  1.0000
   5   8   3    7111     779                                                        7970   -1.89   -0.82  1.0000
   6  -8   3   13340     927                                                       12864    0.88   -1.22  1.0000
   6   8   3   13815     991                                                       13436   -0.87   -1.24  1.0000
   6   8  -3   13989     979                                                       13614   -0.87   -1.23  1.0000
  -6   8   3   14451    1161                                                       14083    0.88    1.23  1.0000
  -6  -8   3   13519     888                                                       13026   -0.87    1.23  1.0000
   6   8   3   14722     915                                                       14332   -0.87   -1.24  1.0000
  -6   8  -3   13919    1084                                                       13558    0.88    1.22  1.0000
   6  -8  -3   15694     960                                                       15179    0.88   -1.23  1.0000
   7  -8  -3    3800     645                                                        3059    1.81   -1.47  1.0000
   7   8  -3    4213     642                                                        3442   -1.82   -1.47  1.0000
  -7  -8  -3    3461     589                                                        2758   -1.82    1.46  1.0000
  -7   8  -3    3199     741                                                        2519    1.82    1.47  1.0000
   7   8   3    3656     606                                                        2937   -1.82   -1.46  1.0000
  -7  -8   3    2580     546                                                        1967   -1.82    1.47  1.0000
  -7   8   3    3345     810                                                        2651    1.81    1.47  1.0000
   7  -8   3    3143     618                                                        2466    1.82   -1.47  1.0000
  -8   8  -3      32     691                                                         -26    1.12   -0.58  1.0000
   8  -8   3     252     541                                                         211    1.12    0.58  1.0000
   8  -8  -3     402     515                                                         342    1.09    0.56  1.0000
  -8  -8   3     469     496                                                         402   -1.08   -0.55  1.0000
   8   8   3     969     555                                                         833   -1.06    0.52  1.0000
  -8   8   3      30     748                                                        -240    1.09   -0.56  1.0000
  -8  -8  -3      28     429                                                        -186   -1.06   -0.52  1.0000
   0   9  -3    9779     783                                                       10423   -0.09    0.77  1.0000
   0  -9  -3    9034     696                                                        9660   -0.08   -0.78  1.0000
   0   9   3    9928     782                                                       10576   -0.08    0.78  1.0000
   0   9   3   10318     806                                                       10979   -0.08    0.78  1.0000
   0  -9   3   10043     798                                                       10703   -0.09   -0.77  1.0000
   1  -9  -3   18999     942                                                       20762    1.66   -0.21  1.0000
   1   9  -3   20033    1095                                                       21779    1.66    0.22  1.0000
   1   9   3   22094    1147                                                       23928    1.65    0.22  1.0000
  -1  -9  -3   19705     918                                                       21500    1.65   -0.22  1.0000
  -1  -9   3   21659    1066                                                       23539    1.66   -0.22  1.0000
   1  -9   3   21096    1082                                                       22948    1.66   -0.21  1.0000
  -1   9   3   22135    1090                                                       23970    1.66    0.21  1.0000
   1   9   3   21145    1046                                                       22939    1.65    0.22  1.0000
  -1   9  -3   21527    1073                                                       23332    1.66    0.21  1.0000
  -1   9   3   20663    1077                                                       22437    1.66    0.21  1.0000
   2  -9  -3   29063    1051                                                       26494   -0.19   -2.02  1.0000
   2   9   3   26897    1184                                                       24518   -0.19    2.01  1.0000
   2   9   3   30153    1109                                                       27633   -0.19    2.01  1.0000
   2   9  -3   27233    1180                                                       24838   -0.18    2.02  1.0000
  -2  -9   3   30145    1149                                                       27538   -0.18   -2.02  1.0000
  -2   9   3   27806    1236                                                       25376   -0.19    2.02  1.0000
  -2   9  -3   30267    1143                                                       27728   -0.19    2.02  1.0000
   2  -9   3   30053    1185                                                       27439   -0.19   -2.02  1.0000
[truncated: 1,826,409 more chars]
